# Supplementary material for: TFPN-mediated racemization/epimerization-free amide and peptide bond formation
Source: Royal Society of Chemistry journal article supplement (doi:10.1039/d4qo01009d), 2024-01-01
Supplement: d4qo01009d1.pdf [file d4qo01009d1.pdf]

# Supporting Information

## TFPN-mediated racemization/epimerization-free amide and peptide bond formation

Jinhua Yang,<sup>a\*</sup> Dou Zhang,<sup>a</sup> Yajin Chang,<sup>a</sup> Bo Zhang,<sup>a</sup> Peng Shen,<sup>a</sup> Chunyu Han<sup>a\*</sup>  
and Junfeng Zhao<sup>b\*</sup>

<sup>a</sup>Hubei Key Laboratory of Pollutant Analysis & Reuse Technology, College of Chemistry and  
Chemical Engineering, Hubei Normal University, Huangshi 435002, P. R. China

<sup>b</sup>Affiliated Cancer Hospital, Guangdong Provincial Key Laboratory of Major Obstetric Diseases,  
School of Pharmaceutical Sciences, Guangzhou Medical University, Guangzhou 511436, P. R.  
China

E-mail: [jhyang@hunu.edu.cn](mailto:jhyang@hunu.edu.cn); [cyhan@hbnu.edu.cn](mailto:cyhan@hbnu.edu.cn); [zhaojf@gzhmu.edu.cn](mailto:zhaojf@gzhmu.edu.cn)

# Contents

|                                                                            |            |
|----------------------------------------------------------------------------|------------|
| <b>General information .....</b>                                           | <b>S2</b>  |
| <b>Synthesis of acyl fluorides .....</b>                                   | <b>S3</b>  |
| <b>General procedure for the challenge amide formation .....</b>           | <b>S8</b>  |
| <b>General procedure for the synthesis of peptides .....</b>               | <b>S13</b> |
| <b>The synthesis of protected Leu-enkephalin .....</b>                     | <b>S30</b> |
| <b>HPLC studies for determining epimerization with Ser, Asn, Asp .....</b> | <b>S35</b> |
| <b>Procedures for the synthesis of peptides on resin (SPPS) .....</b>      | <b>S38</b> |
| <b>NMR spectrum .....</b>                                                  | <b>S45</b> |

## General information

Unless otherwise stated, all components as well as reagents and solvents were bought from commercial suppliers (Leyan, Energy Chemical) and used without further purification. TLC analysis was performed using commercially prepared silica gel plates, and visualization was affected at ultraviolet light (254 nm).  $^1\text{H}/^{13}\text{C}\{\text{H}\}$  NMR spectra were recorded on Bruker Avance 300 MHz and Bruker AMX 300 MHz spectrometer at 300/75 MHz, respectively, in  $\text{CDCl}_3$  unless otherwise stated, using either TMS or the undeuterated solvent residual signal as the reference.  $\text{CDCl}_3$  referenced at  $\delta$  7.26 and 77.00 ppm,  $\text{DMSO-}d_6$  referenced at  $\delta$  2.50 and 39.8 ppm. Data for  $^1\text{H}$  is reported as follows: chemical shift ( $\delta$  ppm), integration, multiplicity (s = singlet, d = doublet, t = triplet, q = quartet, m = multiplet), broad peaks (br), coupling constant (Hz) and assignment. Data for  $^{13}\text{C}\{\text{H}\}$  NMR are reported in terms of chemical shift ( $\delta$  ppm), multiplicity (s = singlet, d = doublet, t = triplet, q = quartet, m = multiplet), coupling constant (Hz) and no special nomenclature is used for equivalent carbons. Flash column chromatography purification of compounds was carried out by gradient elution using ethyl acetate (EA) in light petroleum ether (PE). HRMS (ESI) spectra were obtained by the electrospray ionization time-of-flight (ESI-TOF) mass spectrometry. Analytical HPLC was performed on an UltiMate 3000 HPLC system with appropriate columns and elution conditions.

## Synthesis of acyl fluorides

In a round bottom flask, 4-methoxybenzoic acid (**1a**, 0.20 mmol), TFPN (**2a**, 0.24 mmol) was dissolved in DMF (1 mL), then DIPEA (0.24 mmol) was added to the solution and reaction mixture was stirred at room temperature until 4-methoxybenzoic acid was fully consumed. After the reaction was finished, water (10 mL) was added followed by EtOAc (3 x 10 mL). Combined organic layers were washed with brine (1 x 20 mL), dried over Na<sub>2</sub>SO<sub>4</sub>, filtered, and concentrated in vacuum. The crude product was purified by silica gel chromatography to afford the 4-methoxybenzoyl fluoride (**4a**) in 93% yield.

### 3,4-dicyano-2,5,6-trifluorophenyl 4-methoxybenzoate (**3a**)

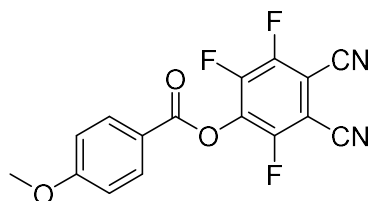

White solid, 92% yield,  $R_f = 0.3$  (PE/EA = 4:1). <sup>1</sup>H NMR (400 MHz, CDCl<sub>3</sub>)  $\delta$  8.14 (d,  $J = 8.9$  Hz, 2H), 7.03 (d,  $J = 8.9$  Hz, 2H), 3.93 (s, 3H). <sup>13</sup>C{<sup>1</sup>H} NMR (100 MHz, CDCl<sub>3</sub>)  $\delta$  165.4, 161.1, 154.0 (dt,  $J = 264.5, 3.4$  Hz), 149.7 (ddd,  $J = 265.5, 14.0, 3.7$  Hz), 148.4 (ddd,  $J = 266.9, 13.7, 4.9$  Hz), 134.6 (tt,  $J = 16.0, 2.9$  Hz), 133.4, 117.7, 114.5, 108.8 (dt,  $J = 10.3, 2.9$  Hz), 102.7 (dt,  $J = 16.3, 2.6$  Hz), 100.8 (ddd,  $J = 17.9, 4.6, 1.8$  Hz), 55.8. <sup>19</sup>F NMR (376 MHz, CDCl<sub>3</sub>)  $\delta$  -113.15 – -117.83 (d,  $J = 8.8$  Hz), -127.02 (dd,  $J = 21.0, 11.0$  Hz), -131.00 (dd,  $J = 21.0, 8.4$  Hz). (s, 1F). HRMS  $m/z$  (ESI) calcd for C<sub>16</sub>H<sub>8</sub>F<sub>3</sub>N<sub>2</sub>O<sub>3</sub><sup>+</sup> [M+H]<sup>+</sup>: 333.0482, found: 333.0486.

### 4-methoxybenzoyl fluoride (**4a**)<sup>1</sup>

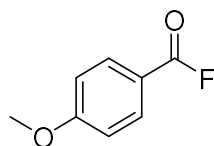

Colorless oil, 93% yield,  $R_f = 0.5$  (PE/EA = 10:1).  $^1\text{H}$  NMR (400 MHz,  $\text{DMSO-}d_6$ )  $\delta$  8.00 (d,  $J = 9.0$  Hz, 2H), 7.15 (d,  $J = 9.0$  Hz, 2H), 3.89 (s, 3H);  $^{13}\text{C}\{\text{H}\}$  NMR (100 MHz,  $\text{DMSO-}d_6$ )  $\delta$  165.5, 157.1 (d,  $J = 338.9$  Hz), 134.0 (d,  $J = 4.1$  Hz), 115.9 (d,  $J = 61.5$  Hz), 115.2, 56.2.  $^{19}\text{F}$  NMR (376 MHz,  $\text{DMSO-}d_6$ )  $\delta$  16.0 (s, 1F).

**4-ethylbenzoyl fluoride (4b)** <sup>2</sup>

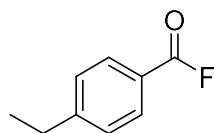

Colorless oil, 95% yield,  $R_f = 0.5$  (PE/EA = 10:1).  $^1\text{H}$  NMR (400 MHz,  $\text{DMSO-}d_6$ )  $\delta$  7.96 (d,  $J = 8.3$  Hz, 2H), 7.48 (d,  $J = 7.9$  Hz, 1H), 2.73 (q,  $J = 7.6$  Hz, 2H), 1.21 (t,  $J = 7.6$  Hz, 3H).  $^{13}\text{C}\{\text{H}\}$  NMR (100 MHz,  $\text{DMSO-}d_6$ )  $\delta$  157.3 (d,  $J = 342.2$  Hz), 153.2, 131.72 (d,  $J = 4.0$  Hz), 129.2, 121.7 (d,  $J = 60.6$  Hz), 28.6, 15.2.  $^{19}\text{F}$  NMR (376 MHz,  $\text{DMSO-}d_6$ )  $\delta$  18.0 (s, 1F).

**(a)  $^1\text{H}$  NMR study of acyl fluoride formation and (b) Proposed mechanism for the deoxyfluorination intermediate formation**

**$^1\text{H}$  NMR spectra of 3a**

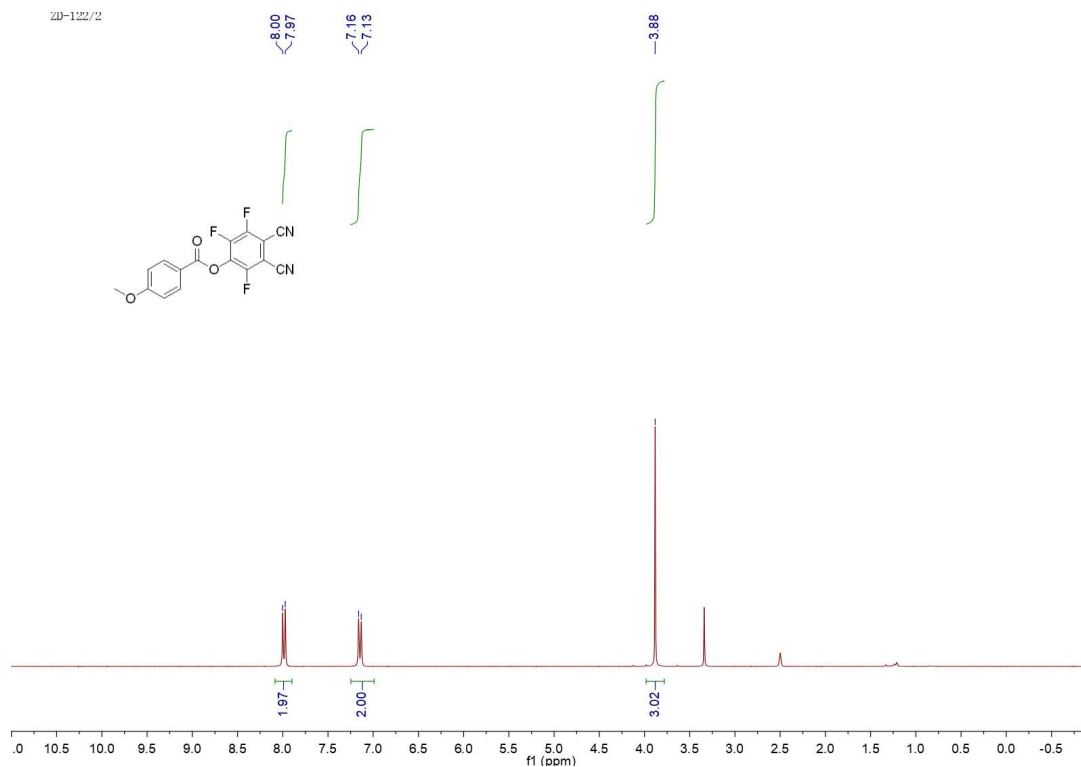

**$^1\text{H}$  NMR spectra of 4a**

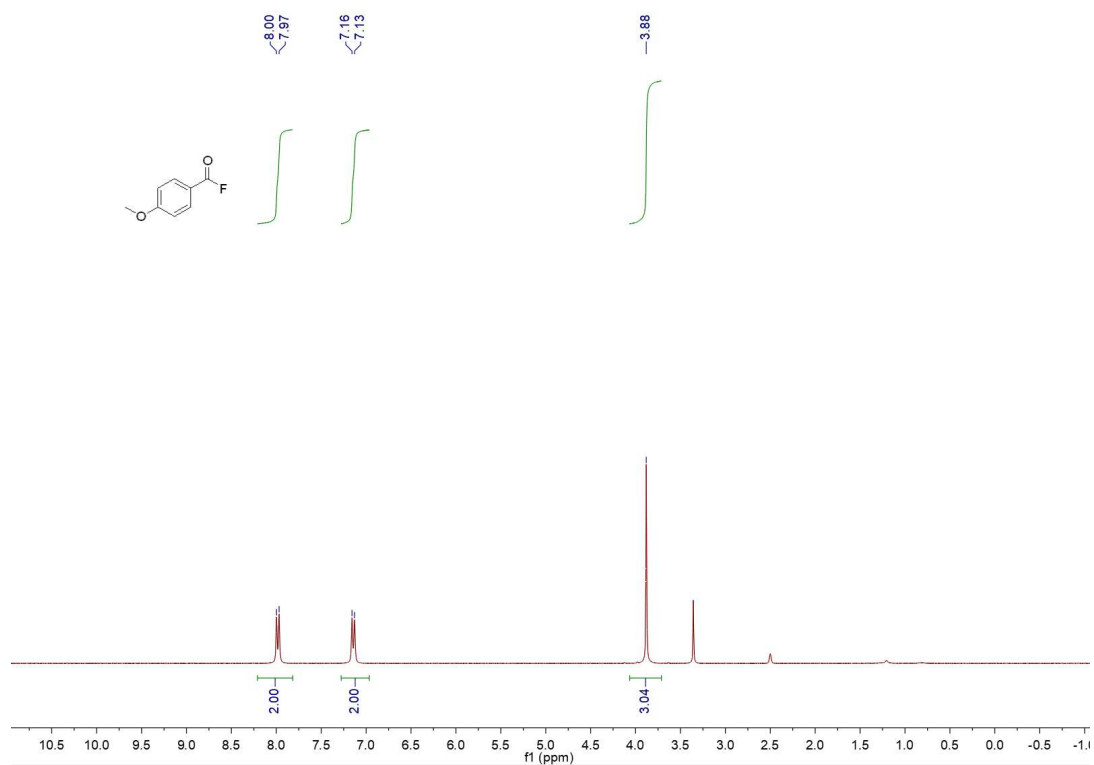

### <sup>1</sup>H NMR spectra of 4b

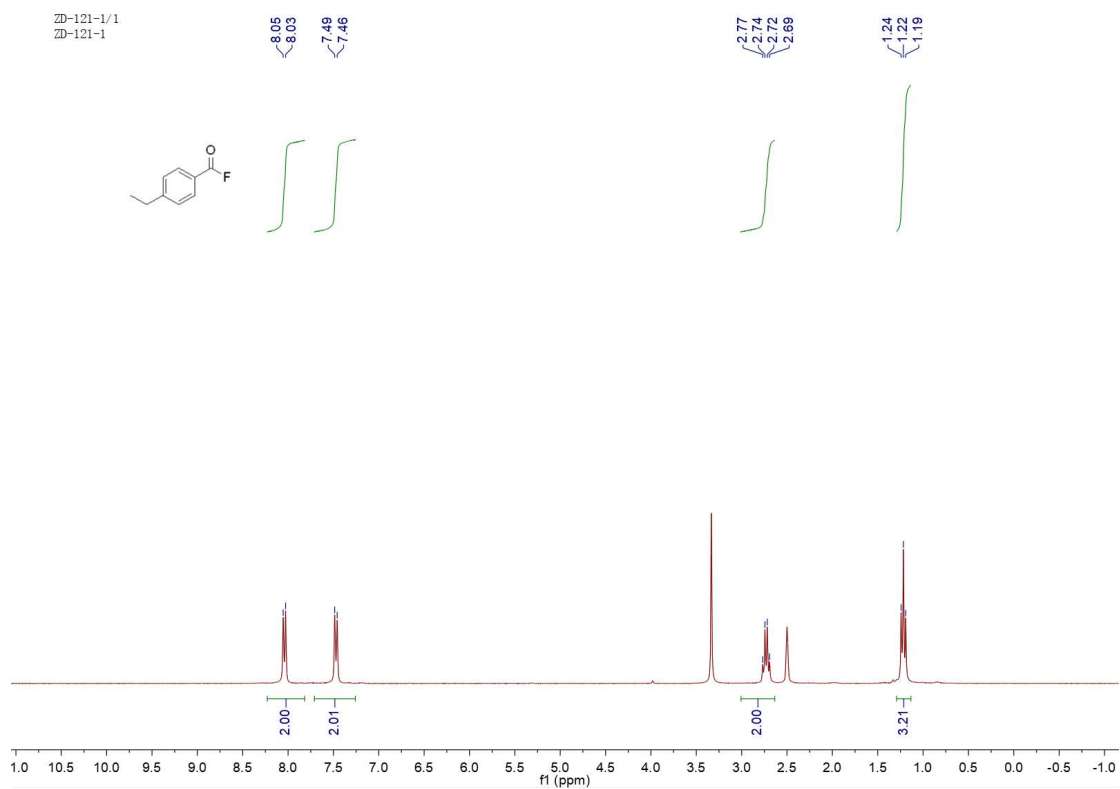

### Acyl fluoride formation reaction monitored by <sup>1</sup>H NMR

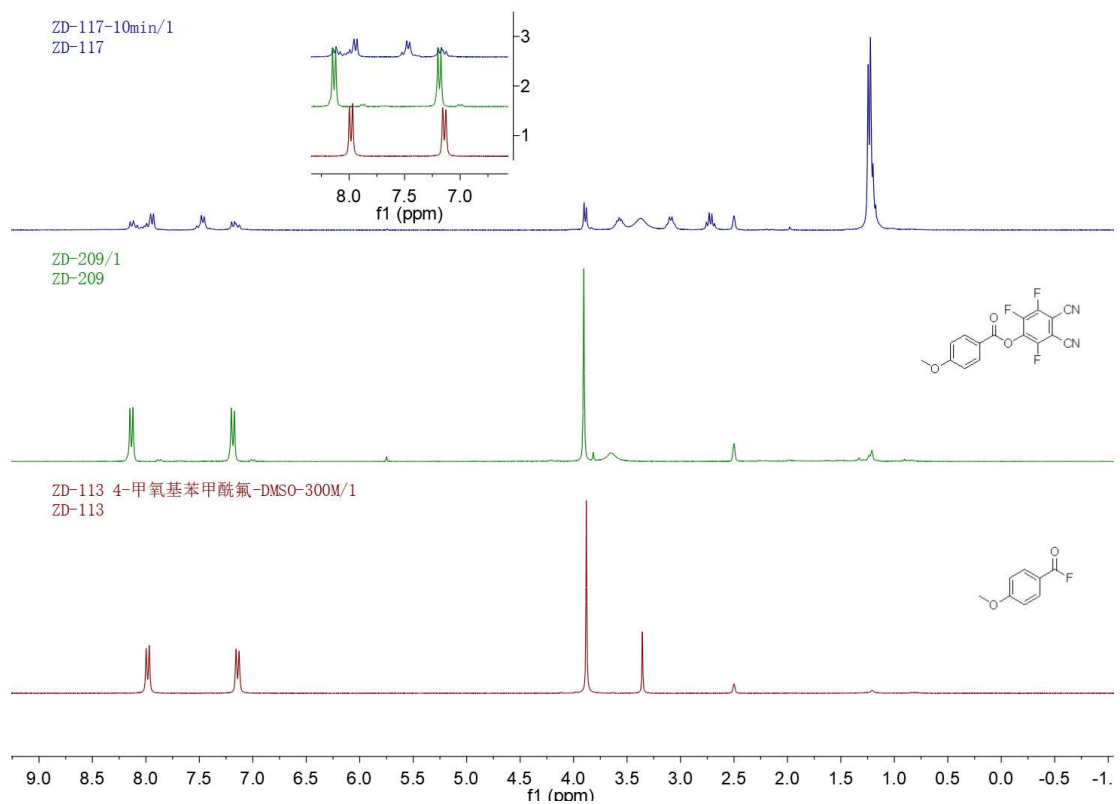

**(b) Proposed mechanism for the deoxyfluorination intermediate formation**

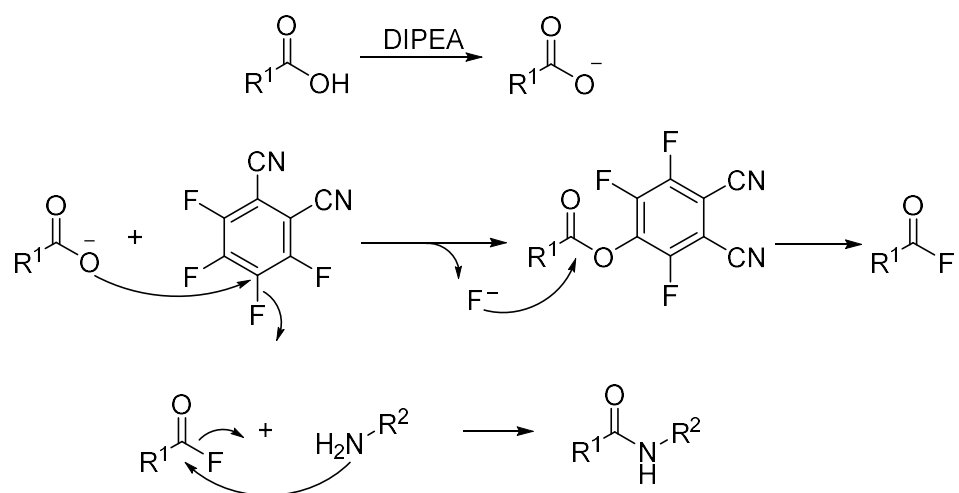



## General procedure for the challenge amide formation

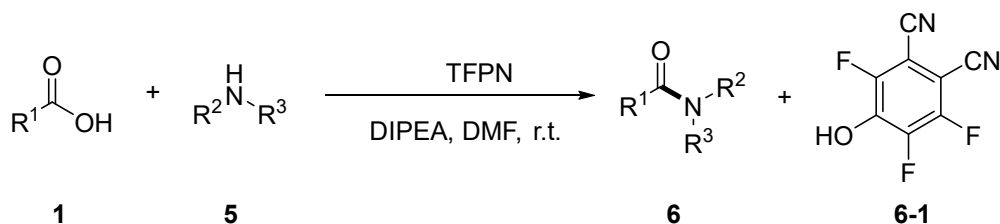

To a mixture of compound **1** (0.30 mmol) and TFPN (0.36 mmol) in DMF (1 mL) was added the DIPEA (0.36 mmol). The reaction solution was stirred at room temperature for 10 min. Then amine **5** (0.36 mmol) was added to the above solution and the reaction mixture was stirred at room temperature under air until the acyl fluoride intermediate was fully consumed. After these reactions were finished, water (20 mL) was added followed by EtOAc (3 x 10 mL), and the layers were separated. Combined organic layers were washed with brine (1 x 20 mL), dried over Na<sub>2</sub>SO<sub>4</sub>, filtered, and concentrated in vacuum. The crude product was purified by silica gel chromatography to afford **6** and **6-1**.

### 4-(*N,N*-dipropylsulfamoyl)-*N*-phenylbenzamide (**6a**)<sup>3</sup>

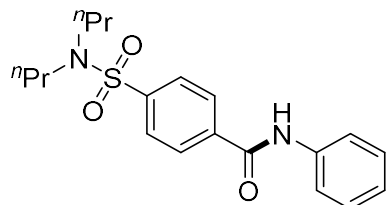

White solid, 99% yield,  $R_f = 0.3$  (PE/EA = 4:1). <sup>1</sup>H NMR 8.67 (s, 1H), 7.89 (d,  $J = 8.1$  Hz, 2H), 7.69 (t,  $J = 8.8$  Hz, 4H), 7.35 (t,  $J = 7.8$  Hz, 2H), 7.15 (t,  $J = 7.4$  Hz, 1H), 3.05 (t,  $J = 7.7$  Hz, 4H), 1.52 (h,  $J = 7.5$  Hz, 4H), 0.85 (t,  $J = 7.4$  Hz, 6H). <sup>13</sup>C{<sup>1</sup>H} NMR (75 MHz, CDCl<sub>3</sub>)  $\delta$  165.0, 142.4, 138.9, 137.9, 129.0, 128.1, 127.1, 124.8, 120.4, 50.0, 21.9, 11.1.

### *N*-(4-chlorophenyl)-4-(*N,N*-dipropylsulfamoyl)benzamide (**6b**)<sup>4</sup>

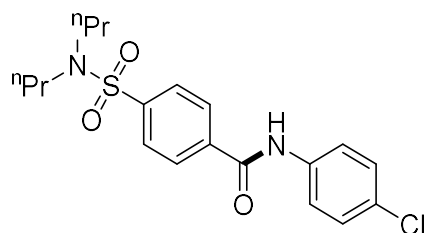

Yellow solid, 98% yield,  $R_f = 0.3$  (PE/EA = 5:1).  $^1\text{H}$  NMR (300 MHz,  $\text{CDCl}_3$ )  $\delta$  8.59 (s, 1H), 7.89 (d,  $J = 8.1$  Hz, 2H), 7.69 (d,  $J = 8.1$  Hz, 4H), 7.35 (d,  $J = 8.6$  Hz, 2H), 7.27 (s, 1H), 3.22 – 2.86 (m, 4H), 1.53 (q,  $J = 7.5$  Hz, 4H), 0.86 (t,  $J = 7.4$  Hz, 6H).  $^{13}\text{C}\{\text{H}\}$  NMR (75 MHz,  $\text{CDCl}_3$ )  $\delta$  164.9, 142.5, 138.7, 136.5, 129.8, 129.1, 128.0, 127.2, 121.5, 50.0, 21.9, 11.1.

***N*-(4-bromophenyl)-4-(*N,N*-dipropylsulfamoyl)benzamide (6c) <sup>5</sup>**

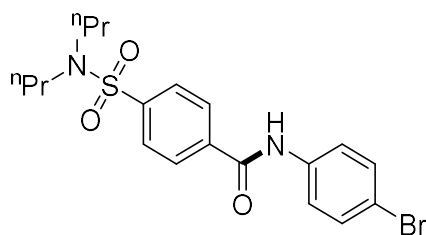

Yellow solid, 98% yield,  $R_f = 0.3$  (PE/EA = 5:1).  $^1\text{H}$  NMR (300 MHz,  $\text{CDCl}_3$ )  $\delta$  8.70 (s, 1H), 7.87 (d,  $J = 8.1$  Hz, 2H), 7.64 (dd,  $J = 8.4, 2.0$  Hz, 4H), 7.46 (d,  $J = 8.5$  Hz, 2H), 3.05 (t,  $J = 7.6$  Hz, 4H), 1.52 (h,  $J = 7.2$  Hz, 4H), 0.85 (t,  $J = 7.4$  Hz, 6H).  $^{13}\text{C}\{\text{H}\}$  NMR (75 MHz,  $\text{CDCl}_3$ )  $\delta$  164.9, 142.4, 138.7, 137.1, 132.0, 128.1, 127.1, 121.8, 117.4, 50.0, 21.9, 11.2.

***N*-(3-chlorophenyl)-4-(*N,N*-dipropylsulfamoyl)benzamide (6d) <sup>6</sup>**

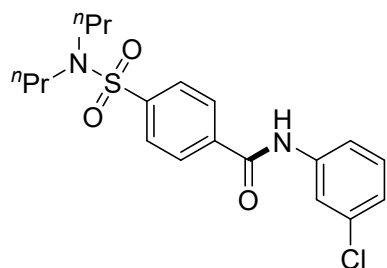

White solid, 90% yield,  $R_f = 0.25$  (PE/EA = 5:1).  $^1\text{H}$  NMR (300 MHz,  $\text{CDCl}_3$ )  $\delta$  8.83 (s, 1H), 7.86 (t,  $J = 8.1$  Hz, 3H), 7.64 (d,  $J = 8.1$  Hz, 3H), 7.28 (t,  $J = 8.0$  Hz, 1H), 7.13

(d,  $J = 7.0$  Hz, 1H), 3.06 (t,  $J = 7.6$  Hz, 4H), 1.54 (h,  $J = 7.4$  Hz, 4H), 0.87 (t,  $J = 7.4$  Hz, 6H).  $^{13}\text{C}\{\text{H}\}$  NMR (75 MHz,  $\text{CDCl}_3$ )  $\delta$  165.1, 142.4, 139.2, 138.7, 134.6, 130.0, 128.1, 127.1, 124.7, 120.3, 118.3, 50.0, 22.0, 11.2.

***N*-(3,5-bis(trifluoromethyl)phenyl)-4-(*N,N*-dipropylsulfamoyl)benzamide (6e)**

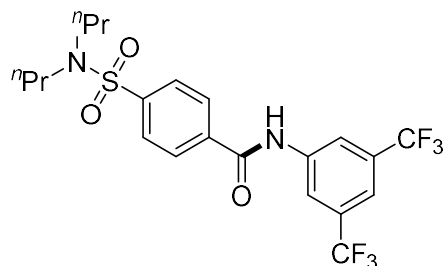

White solid, 99% yield,  $R_f = 0.3$  (PE/EA = 5:1).  $^1\text{H}$  NMR (300 MHz,  $\text{CDCl}_3$ )  $\delta$  9.32 (s, 1H), 8.33 (s, 2H), 7.86 (d,  $J = 8.2$  Hz, 2H), 7.65 (s, 1H), 7.59 (d,  $J = 8.3$  Hz, 2H), 3.06 (d,  $J = 7.5$  Hz, 5H), 1.55 (h,  $J = 7.4$  Hz, 4H), 0.86 (t,  $J = 7.4$  Hz, 6H).  $^{13}\text{C}\{\text{H}\}$  NMR (75 MHz,  $\text{CDCl}_3$ )  $\delta$  165.7, 142.2, 139.8, 138.6, 132.3 (q,  $J = 33.3$  Hz), 128.3, 127.2, 123.2 (d,  $J = 272.8$  Hz), 119.9 (d,  $J = 3.2$  Hz), 117.8, 50.2, 22.0, 11.1. HRMS  $m/z$  (ESI) calcd for  $\text{C}_{21}\text{H}_{23}\text{F}_6\text{N}_2\text{O}_3\text{S}^+$   $[\text{M}+\text{H}]^+$ : 497.1328, found: 497.1317.

***4*-(*N,N*-dipropylsulfamoyl)-*N*-(*o*-tolyl)benzamide (6f)**

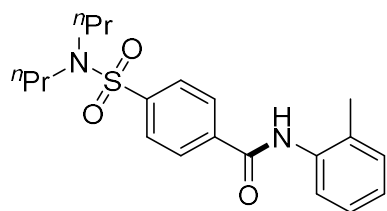

White solid, 99% yield,  $R_f = 0.3$  (PE/EA = 5:1).  $^1\text{H}$  NMR (300 MHz,  $\text{CDCl}_3$ )  $\delta$  8.00 (d,  $J = 8.2$  Hz, 2H), 7.95 – 7.83 (m, 3H), 7.79 (s, 1H), 7.34 – 7.23 (m, 2H), 7.18 (t,  $J = 7.3$  Hz, 1H), 3.22 – 3.00 (m, 4H), 2.36 (s, 3H), 1.62 – 1.48 (m, 4H), 0.89 (t,  $J = 7.4$  Hz, 6H).  $^{13}\text{C}\{\text{H}\}$  NMR (75 MHz,  $\text{CDCl}_3$ )  $\delta$  164.4, 143.2, 138.4, 135.2, 130.7, 129.8, 127.8, 127.5, 127.0, 126.0, 123.5, 50.0, 22.0, 17.9, 11.2. HRMS  $m/z$  (ESI) calcd for  $\text{C}_{20}\text{H}_{27}\text{N}_2\text{O}_3\text{S}^+$   $[\text{M}+\text{H}]^+$ : 375.1737, found: 375.1729.

***4*-(*N,N*-dipropylsulfamoyl)-*N*-mesitylbenzamide (6g)**

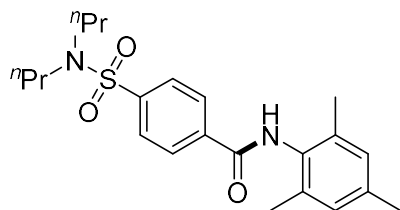

White solid, 90% yield,  $R_f = 0.3$  (PE/EA = 5:1).  $^1\text{H}$  NMR (300 MHz,  $\text{CDCl}_3$ )  $\delta$  7.99 (d,  $J = 8.1$  Hz, 2H), 7.85 (d,  $J = 8.0$  Hz, 2H), 7.62 (s, 1H), 6.94 (s, 2H), 3.20 – 3.01 (m, 4H), 2.30 (s, 3H), 2.23 (s, 6H), 1.55 (p,  $J = 7.4$  Hz, 4H), 0.88 (t,  $J = 7.4$  Hz, 6H).  $^{13}\text{C}\{\text{H}\}$  NMR (75 MHz,  $\text{CDCl}_3$ )  $\delta$  164.9, 142.9, 138.1, 137.5, 135.2, 130.8, 129.1, 128.0, 127.3, 50.0, 22.0, 21.0, 18.4, 11.2. HRMS  $m/z$  (ESI) calcd for  $\text{C}_{22}\text{H}_{31}\text{N}_2\text{O}_3\text{S}^+$   $[\text{M}+\text{H}]^+$ : 403.2050, found: 403.2037.

***N*-(tert-butyl)-4-(*N,N*-dipropylsulfamoyl)benzamide (6h) <sup>7</sup>**

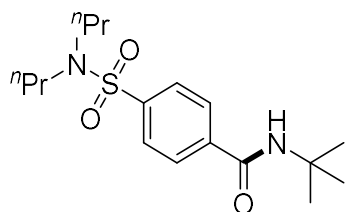

White solid, 99% yield,  $R_f = 0.3$  (PE/EA = 5:1).  $^1\text{H}$  NMR (300 MHz,  $\text{CDCl}_3$ )  $\delta$  7.79 (d,  $J = 8.3$  Hz, 2H), 7.71 (d,  $J = 7.8$  Hz, 2H), 6.25 (s, 1H), 3.11 – 2.92 (m, 4H), 1.60 – 1.37 (m, 13H), 0.83 (t,  $J = 7.3$  Hz, 6H).  $^{13}\text{C}\{\text{H}\}$  NMR (75 MHz,  $\text{CDCl}_3$ )  $\delta$  165.7, 142.1, 139.5, 127.6, 127.0, 52.0, 49.9, 28.7, 21.9, 11.1.

***N*-benzyl-4-(*N,N*-dipropylsulfamoyl)-*N*-methylbenzamide (6i)**

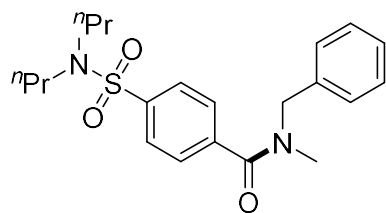

White solid, 99% yield,  $R_f = 0.4$  (PE/EA = 5:1).  $^1\text{H}$  NMR (300 MHz,  $\text{CDCl}_3$ )  $\delta$  7.92 – 7.71 (m, 2H), 7.63 – 7.50 (m, 2H), 7.47 – 7.22 (m, 4H), 7.19 – 7.06 (m, 1H), 4.61 (s, 2H), 3.17 – 2.76 (m, 7H), 1.69 – 1.44 (m, 4H), 1.00 – 0.75 (m, 6H).  $^{13}\text{C}\{\text{H}\}$  NMR (75 MHz,  $\text{CDCl}_3$ )  $\delta$  170.7, 170.0, 141.2, 140.0, 139.9, 136.5, 135.9, 130.5, 129.0, 128.8, 128.2, 127.9, 127.7, 127.6, 127.4, 127.3, 126.6, 55.0, 50.8, 50.1, 49.9, 36.9, 33.4, 22.1,

21.9, 11.2. HRMS  $m/z$  (ESI) calcd for  $C_{21}H_{29}N_2O_3S^+$   $[M+H]^+$ : 389.1893, found: 389.1880

***N*-(*tert*-butyl)adamantane-1-carboxamide (6j) <sup>8</sup>**

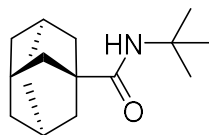

White solid, 92% yield,  $R_f = 0.4$  (PE/EA = 5:1).  $^1H$  NMR (300 MHz,  $CDCl_3$ )  $\delta$  5.36 (s, 1H), 2.07 – 1.96 (m, 3H), 1.85 – 1.75 (m, 6H), 1.75 – 1.60 (m, 6H), 1.31 (s, 9H).  $^{13}C$  { $^1H$ } NMR (75 MHz,  $CDCl_3$ )  $\delta$  177.4, 50.5, 40.8, 39.3, 36.5, 28.8, 28.2.

## General procedure for the synthesis of peptides

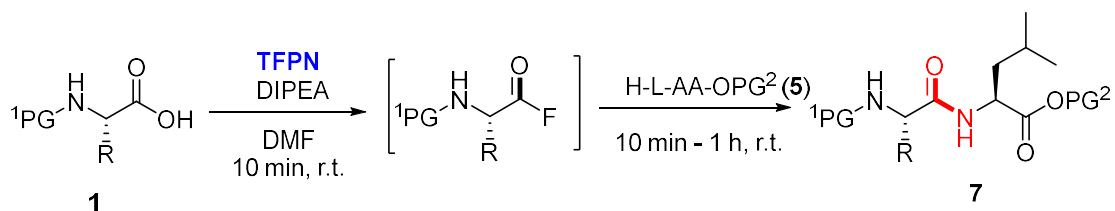

To a mixture of compound **1** (0.30 mmol) and **TFPN** (0.36 mmol) in DMF (1 mL) was added the **DIPEA** (0.36 mmol). The reaction solution was stirred at room temperature for 10 min. Then amine **5** (0.36 mmol) was added to the above solution and the reaction mixture was stirred at room temperature under air until the acyl fluoride intermediate was fully consumed. After these reactions were finished, water (20 mL) was added followed by EtOAc (3 x 10 mL), and the layers were separated. Combined organic layers were washed with brine (1 x 20 mL), dried over Na<sub>2</sub>SO<sub>4</sub>, filtered, and concentrated in vacuum. The crude product was purified by silica gel chromatography to afford **7**.

### tert-butyl (((9H-fluoren-9-yl)methoxy)carbonyl)-L-alanyl-L-leucinate (**7a**)<sup>9</sup>

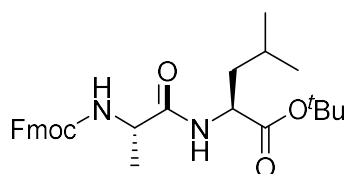

Yellow solid, 95% yield,  $R_f = 0.55$  (PE/EA = 2:1). <sup>1</sup>H NMR (300 MHz, CDCl<sub>3</sub>)  $\delta$  7.68 (d,  $J = 7.5$  Hz, 2H), 7.51 (d,  $J = 7.4$  Hz, 2H), 7.32 (t,  $J = 7.4$  Hz, 2H), 7.23 (t,  $J = 7.4$  Hz, 2H), 6.41 (d,  $J = 8.2$  Hz, 1H), 5.49 (d,  $J = 7.8$  Hz, 1H), 4.48 – 4.36 (m, 1H), 4.36 – 4.17 (m, 3H), 4.13 (t,  $J = 7.1$  Hz, 1H), 1.62 – 1.48 (m, 2H), 1.47 – 1.25 (m, 13H), 0.83 (d,  $J = 5.7$  Hz, 6H). <sup>13</sup>C {<sup>1</sup>H} NMR (75 MHz, CDCl<sub>3</sub>)  $\delta$  171.9, 171.8, 155.9, 143.8, 141.3, 127.7, 127.1, 125.1, 120.0, 82.0, 67.1, 51.5, 50.4, 47.1, 41.7, 28.0, 24.9, 22.8, 22.1, 18.9.

### tert-butyl (((9H-fluoren-9-yl)methoxy)carbonyl)glycyl-L-leucinate (**7b**)<sup>9</sup>

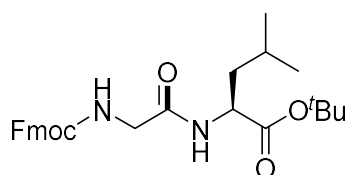

White solid, 97% yield,  $R_f = 0.55$  (PE/EA = 2:1).  $^1\text{H}$  NMR (300 MHz,  $\text{CDCl}_3$ )  $\delta$  7.76 (d,  $J = 7.5$  Hz, 2H), 7.60 (d,  $J = 7.4$  Hz, 2H), 7.40 (t,  $J = 7.4$  Hz, 2H), 7.32 (d,  $J = 7.4$  Hz, 2H), 6.73 (d,  $J = 8.3$  Hz, 1H), 5.80 (t,  $J = 5.5$  Hz, 1H), 4.56 (td,  $J = 8.5, 4.9$  Hz, 1H), 4.40 (d,  $J = 7.1$  Hz, 2H), 4.23 (t,  $J = 7.1$  Hz, 1H), 3.96 (d,  $J = 5.5$  Hz, 2H), 1.77 – 1.51 (m, 3H), 1.47 (s, 9H), 0.94 (dd,  $J = 6.3, 2.4$  Hz, 6H).  $^{13}\text{C}\{\text{H}\}$  NMR (75 MHz,  $\text{CDCl}_3$ )  $\delta$  172.2, 168.8, 156.7, 143.8, 141.3, 127.7, 127.1, 125.1, 120.0, 82.1, 67.3, 51.4, 47.0, 44.4, 41.7, 28.0, 24.9, 22.8, 22.0.

**(9H-fluoren-9-yl)methyl (S)-2-(((S)-1-(tert-butoxy)-4-methyl-1-oxopentan-2-yl)carbamoyl)pyrrolidine-1-carboxylate (7c)**<sup>8</sup>

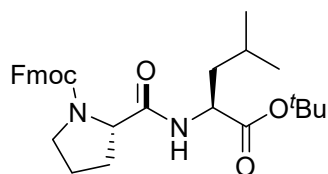

White solid, 93% yield,  $R_f = 0.5$  (PE/EA = 2:1).  $^1\text{H}$  NMR (300 MHz,  $\text{CDCl}_3$ )  $\delta$  7.67 (d,  $J = 7.5$  Hz, 2H), 7.51 (d,  $J = 8.0$  Hz, 2H), 7.35 – 7.13 (m, 4H), 6.99 – 6.18 (m, 1H), 4.56 – 4.22 (m, 4H), 4.23 – 4.08 (m, 1H), 3.62 – 3.26 (m, 2H), 2.33 – 2.05 (m, 1H), 2.02 – 1.74 (m, 3H), 1.61 – 1.47 (m, 2H), 1.46 – 1.19 (m, 10H), 0.81 (d,  $J = 5.8$  Hz, 6H).  $^{13}\text{C}\{\text{H}\}$  NMR (75 MHz,  $\text{CDCl}_3$ )  $\delta$  171.8, 171.2, 156.0, 143.8, 141.3, 127.7, 127.1, 125.1, 120.0, 81.7, 67.8, 61.1, 60.4, 51.6, 47.2, 47.0, 42.0, 41.6, 31.4, 28.3, 28.0, 25.0, 24.7, 23.6, 22.8, 22.2.

**tert-butyl (((9H-fluoren-9-yl)methoxy)carbonyl)-L-valyl-L-leucinate (7d)**<sup>8</sup>

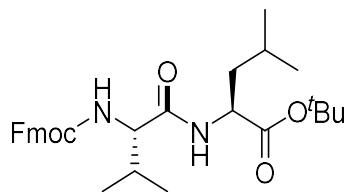

White solid, 91% yield,  $R_f = 0.4$  (PE/EA = 4:1).  $^1\text{H}$  NMR (300 MHz,  $\text{CDCl}_3$ )  $\delta$  7.66 (d,  $J = 7.5$  Hz, 2H), 7.50 (d,  $J = 7.5$  Hz, 2H), 7.29 (t,  $J = 7.5$  Hz, 2H), 7.20 (t,  $J = 7.7$  Hz, 2H), 6.45 (d,  $J = 8.2$  Hz, 1H), 5.57 (d,  $J = 9.0$  Hz, 1H), 4.48 – 4.29 (m, 2H), 4.23 (dd,  $J = 10.5, 7.0$  Hz, 1H), 4.12 (t,  $J = 7.1$  Hz, 1H), 4.06 – 3.96 (m, 1H), 2.10 – 1.93 (m,

1H), 1.65 – 1.45 (m, 2H), 1.45 – 1.23 (m, 10H), 0.95 – 0.69 (m, 12H). <sup>13</sup>C{H} NMR (75 MHz, CDCl<sub>3</sub>) δ 171.9, 171.0, 156.4, 143.9, 143.8, 141.3, 127.7, 127.1, 125.2, 125.1, 120.0, 119.9, 81.9, 67.1, 60.2, 51.5, 47.1, 41.6, 31.5, 28.0, 24.9, 22.7, 22.1, 19.2, 18.0.

**tert-butyl (((9H-fluoren-9-yl)methoxy)carbonyl)-L-isoleucyl-L-leucinate (7e)**<sup>8</sup>

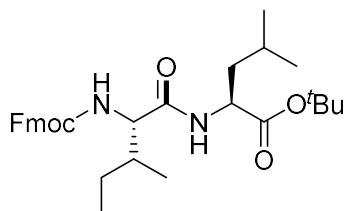

Yellow solid, 92% yield,  $R_f = 0.3$  (PE/EA = 3:1). <sup>1</sup>H NMR (300 MHz, CDCl<sub>3</sub>) δ 7.65 (d,  $J = 7.5$  Hz, 2H), 7.49 (d,  $J = 7.4$  Hz, 2H), 7.28 (t,  $J = 7.5$  Hz, 2H), 7.19 (t,  $J = 7.3$  Hz, 2H), 6.47 (d,  $J = 8.1$  Hz, 1H), 5.59 (d,  $J = 9.0$  Hz, 1H), 4.48 – 4.28 (m, 2H), 4.27 – 4.18 (m, 1H), 4.16 – 4.06 (m, 1H), 4.03 (t,  $J = 8.1$  Hz, 1H), 1.84 – 1.68 (m, 1H), 1.64 – 1.22 (m, 13H), 1.15 – 0.99 (m, 1H), 0.95 – 0.67 (m, 12H). <sup>13</sup>C{H} NMR (75 MHz, CDCl<sub>3</sub>) δ 171.8, 171.0, 156.3, 143.9, 143.8, 141.3, 127.7, 127.1, 125.2, 125.1, 120.0, 119.9, 81.8, 67.1, 59.5, 51.5, 47.1, 41.6, 37.8, 28.0, 24.9, 22.7, 22.1, 15.4, 11.4.

**tert-butyl (((9H-fluoren-9-yl)methoxy)carbonyl)-L-leucyl-L-leucinate (7f)**<sup>8</sup>

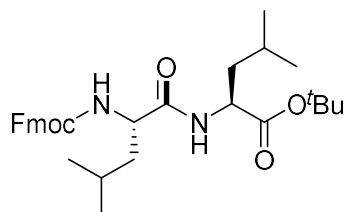

White solid, 99% yield,  $R_f = 0.3$  (PE/EA = 5:1). <sup>1</sup>H NMR (300 MHz, CDCl<sub>3</sub>) δ 7.75 (d,  $J = 7.4$  Hz, 2H), 7.58 (d,  $J = 7.2$  Hz, 2H), 7.39 (t,  $J = 7.3$  Hz, 2H), 7.31 (t,  $J = 7.3$  Hz, 2H), 6.46 (d,  $J = 7.8$  Hz, 1H), 5.42 (d,  $J = 8.4$  Hz, 1H), 4.53 – 4.43 (m, 1H), 4.44 – 4.29 (m, 2H), 4.29 – 4.13 (m, 2H), 1.77 – 1.49 (m, 6H), 1.45 (s, 9H), 0.94 (d,  $J = 4.5$  Hz, 6H), 0.90 (d,  $J = 5.4$  Hz, 6H). <sup>13</sup>C{H} NMR (75 MHz, CDCl<sub>3</sub>) δ 171.8, 171.8, 156.2, 143.9, 143.7, 141.3, 127.7, 127.1, 125.1, 120.0, 120.0, 81.9, 67.1, 53.4, 51.5, 47.1, 41.7, 28.0, 24.9, 24.6, 23.0, 22.7, 22.1.



**tert-butyl (((9H-fluoren-9-yl)methoxy)carbonyl)-L-phenylalanyl-L-leucinate (7g)**

8

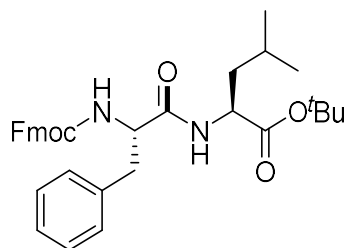

White solid, 92% yield,  $R_f = 0.3$  (PE/EA = 5:1).  $^1\text{H}$  NMR (300 MHz,  $\text{CDCl}_3$ )  $\delta$  7.66 (d,  $J = 7.5$  Hz, 2H), 7.44 (t,  $J = 6.4$  Hz, 2H), 7.30 (t,  $J = 7.4$  Hz, 2H), 7.25 – 7.03 (m, 7H), 6.39 (s, 1H), 5.46 (s, 1H), 4.51 – 4.26 (m, 3H), 4.18 (t,  $J = 8.6$  Hz, 1H), 4.12 – 4.02 (m, 1H), 2.99 (d,  $J = 6.5$  Hz, 2H), 1.53 – 1.42 (m, 2H), 1.42 – 1.27 (m, 10H), 0.79 (t,  $J = 4.8$  Hz, 6H).  $^{13}\text{C}\{\text{H}\}$  NMR (75 MHz,  $\text{CDCl}_3$ )  $\delta$  171.7, 170.5, 155.9, 143.8, 143.7, 141.3, 136.3, 129.5, 128.6, 127.7, 127.1, 127.0, 125.2, 125.1, 120.0, 82.0, 67.1, 55.9, 51.5, 47.1, 41.8, 38.6, 28.0, 24.8, 22.7, 22.1.

**tert-butyl ((S)-2-(((9H-fluoren-9-yl)methoxy)carbonyl)amino)-3-(4-(tert-butoxy)phenyl)propanoyl)-L-leucinate (7h)**

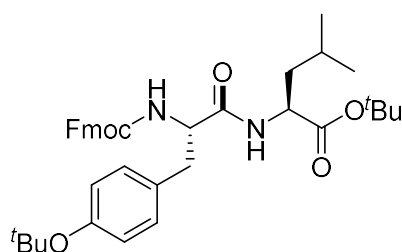

White solid, 91% yield,  $R_f = 0.75$  (PE/EA = 2:1).  $^1\text{H}$  NMR (300 MHz,  $\text{CDCl}_3$ )  $\delta$  7.67 (d,  $J = 7.5$  Hz, 2H), 7.47 (dd,  $J = 7.4, 2.4$  Hz, 2H), 7.31 (t,  $J = 7.4$  Hz, 2H), 7.22 (t,  $J = 7.4$  Hz, 2H), 7.00 (d,  $J = 8.0$  Hz, 2H), 6.80 (d,  $J = 8.1$  Hz, 2H), 6.26 (d,  $J = 8.0$  Hz, 1H), 5.37 (d,  $J = 8.3$  Hz, 1H), 4.46 – 4.28 (m, 3H), 4.24 (d,  $J = 7.4$  Hz, 1H), 4.10 (t,  $J = 6.9$  Hz, 1H), 2.96 (t,  $J = 6.6$  Hz, 2H), 1.54 – 1.42 (m, 2H), 1.42 – 1.29 (m, 10H), 1.22 (s, 9H), 0.80 (dd,  $J = 6.0, 3.5$  Hz, 6H).  $^{13}\text{C}\{\text{H}\}$  NMR (75 MHz,  $\text{CDCl}_3$ )  $\delta$  171.6, 170.4, 155.9, 154.4, 143.8, 143.7, 141.3, 131.0, 129.9, 127.7, 127.1, 125.1, 125.1, 124.2, 120.0, 82.0, 78.4, 67.1, 55.9, 51.5, 47.1, 41.7, 37.8, 28.8, 28.0, 24.8, 22.7, 22.1. HRMS  $m/z$  (ESI) calcd for  $\text{C}_{38}\text{H}_{49}\text{N}_2\text{O}_6^+$   $[\text{M}+\text{H}]^+$ : 629.3585, found: 629.3577.

**tert-butyl 3-((S)-2-(((9H-fluoren-9-yl)methoxy)carbonyl)amino)-3-(((S)-1-(tert-butoxy)-4-methyl-1-oxopentan-2-yl)amino)-3-oxopropyl)-1H-indole-1-carboxylate (7i)** <sup>10</sup>

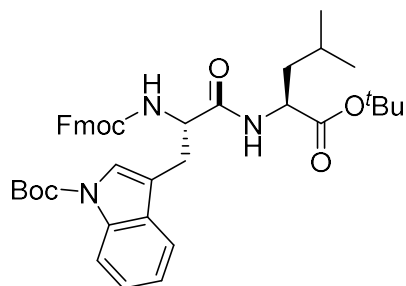

White solid, 93% yield,  $R_f = 0.75$  (PE/EA = 2:1).  $^1\text{H}$  NMR (300 MHz,  $\text{CDCl}_3$ )  $\delta$  8.04 (d,  $J = 8.1$  Hz, 1H), 7.65 (d,  $J = 7.5$  Hz, 2H), 7.57 (d,  $J = 7.6$  Hz, 1H), 7.44 (t,  $J = 6.1$  Hz, 3H), 7.28 (q,  $J = 5.7, 4.1$  Hz, 2H), 7.24 – 7.09 (m, 4H), 6.25 (dd,  $J = 7.9, 4.3$  Hz, 1H), 5.58 (d,  $J = 8.0$  Hz, 1H), 4.50 (q,  $J = 7.2$  Hz, 1H), 4.39 – 4.18 (m, 3H), 4.09 (t,  $J = 7.2$  Hz, 1H), 3.28 – 2.97 (m, 2H), 1.54 (s, 9H), 1.48 – 1.38 (m, 2H), 1.39 – 1.24 (m, 10H), 0.77 (dd,  $J = 5.9, 2.7$  Hz, 7H).  $^{13}\text{C}\{\text{H}\}$  NMR (75 MHz,  $\text{CDCl}_3$ )  $\delta$  171.4, 170.5, 156.0, 149.5, 143.8, 143.7, 141.3, 135.5, 130.3, 127.7, 127.1, 125.2, 125.1, 124.7, 124.6, 122.8, 120.0, 119.1, 115.4, 115.3, 83.6, 81.9, 67.3, 54.7, 51.7, 47.1, 41.7, 28.4, 28.2, 28.0, 24.8, 22.7, 22.2.

**tert-butyl 5-((S)-2-(((9H-fluoren-9-yl)methoxy)carbonyl)amino)-3-(((S)-1-(tert-butoxy)-4-methyl-1-oxopentan-2-yl)amino)-3-oxopropyl)-1H-imidazole-1-carboxylate (7j)** <sup>8</sup>

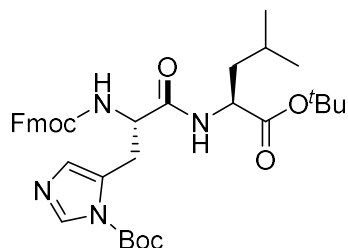

White solid, 96% yield,  $R_f = 0.4$  (PE/EA = 2:1).  $^1\text{H}$  NMR (300 MHz,  $\text{CDCl}_3$ )  $\delta$  7.96 (s, 1H), 7.68 (d,  $J = 7.5$  Hz, 2H), 7.63 – 7.48 (m, 2H), 7.32 (t,  $J = 7.4$  Hz, 2H), 7.23 (t,  $J = 7.5$  Hz, 2H), 7.11 (d,  $J = 7.0$  Hz, 2H), 6.62 (d,  $J = 7.5$  Hz, 1H), 4.50 (d,  $J = 6.3$  Hz, 1H), 4.40 – 4.22 (m, 3H), 4.19 (d,  $J = 7.4$  Hz, 1H), 3.09 (dd,  $J = 14.8, 5.0$  Hz, 1H), 2.89 (dd,

$J = 14.9, 5.9$  Hz, 1H), 1.51 (s, 9H), 1.44 – 1.22 (m, 12H), 0.77 (t,  $J = 6.0$  Hz, 6H).  $^{13}\text{C}\{\text{H}\}$  NMR (75 MHz,  $\text{CDCl}_3$ )  $\delta$  171.6, 170.5, 156.2, 146.8, 143.9, 141.2, 139.1, 136.7, 127.7, 127.1, 125.2, 119.9, 114.9, 85.7, 81.7, 67.3, 54.7, 51.4, 47.1, 41.5, 30.3, 27.9, 27.8, 24.6, 22.8, 21.8.

**tert-butyl N-(((9H-fluoren-9-yl)methoxy)carbonyl)-O-(tert-butyl)-L-seryl-L-leucinate (7k)** <sup>11</sup>

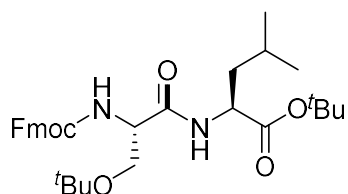

White solid, 98% yield,  $R_f = 0.25$  (PE/EA = 4:1).  $^1\text{H}$  NMR (300 MHz,  $\text{CDCl}_3$ )  $\delta$  7.77 (d,  $J = 7.0$  Hz, 2H), 7.69 – 7.53 (m, 2H), 7.40 (t,  $J = 6.8$  Hz, 2H), 7.32 (t,  $J = 6.9$  Hz, 2H), 7.28 – 7.19 (m, 1H), 5.79 (s, 1H), 4.60 – 4.33 (m, 3H), 4.25 (d,  $J = 5.9$  Hz, 2H), 3.91 – 3.76 (m, 1H), 3.40 (t,  $J = 7.7$  Hz, 1H), 1.70 – 1.57 (m, 2H), 1.54 (s, 1H), 1.46 (s, 9H), 1.22 (s, 9H), 0.95 (d,  $J = 4.8$  Hz, 6H).  $^{13}\text{C}\{\text{H}\}$  NMR (75 MHz,  $\text{CDCl}_3$ )  $\delta$  171.6, 169.9, 156.0, 143.9, 143.8, 141.3, 127.7, 127.1, 125.1, 120.0, 81.7, 74.3, 67.1, 61.8, 54.3, 51.6, 47.1, 41.9, 28.0, 27.4, 24.9, 22.8, 22.1.

**tert-butyl N-(((9H-fluoren-9-yl)methoxy)carbonyl)-O-(tert-butyl)-L-threonyl-L-leucinate (7l)**

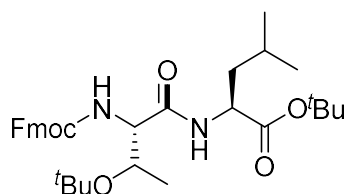

Yellow solid, 97% yield,  $R_f = 0.5$  (PE/EA = 4:1).  $^1\text{H}$  NMR (300 MHz,  $\text{CDCl}_3$ )  $\delta$  7.67 (d,  $J = 7.5$  Hz, 2H), 7.53 (d,  $J = 7.5$  Hz, 3H), 7.31 (t,  $J = 7.5$  Hz, 2H), 7.23 (t,  $J = 7.4$  Hz, 2H), 5.96 (d,  $J = 4.8$  Hz, 1H), 4.49 – 4.23 (m, 3H), 4.22 – 3.98 (m, 3H), 1.66 – 1.50 (m, 2H), 1.51 – 1.32 (m, 10H), 1.22 (s, 9H), 1.05 (d,  $J = 6.2$  Hz, 3H), 0.88 (t,  $J = 6.3$  Hz, 6H).  $^{13}\text{C}\{\text{H}\}$  NMR (75 MHz,  $\text{CDCl}_3$ )  $\delta$  171.5, 169.2, 156.1, 144.0, 143.7, 141.3, 141.3, 127.7, 127.1, 125.2, 120.0, 120.0, 81.6, 75.6, 66.9, 66.8, 58.3, 51.9, 47.2, 41.4,

28.2, 28.0, 25.1, 22.8, 22.1, 16.5. HRMS  $m/z$  (ESI) calcd for  $C_{33}H_{47}N_2O_6^+$   $[M+H]^+$ : 567.3429, found: 567.3409.

**tert-butyl N2-(((9H-fluoren-9-yl)methoxy)carbonyl)-N6-(tert-butoxycarbonyl)-L-lysyl-L-leucinate (7m)**<sup>12</sup>

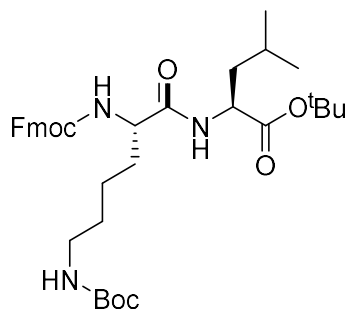

White solid, 99% yield,  $R_f = 0.3$  (PE/EA = 4:1).  $^1H$  NMR (300 MHz,  $CDCl_3$ )  $\delta$  7.74 (d,  $J = 7.5$  Hz, 2H), 7.58 (d,  $J = 7.5$  Hz, 2H), 7.38 (t,  $J = 7.5$  Hz, 2H), 7.30 (d,  $J = 7.5$  Hz, 2H), 6.63 (d,  $J = 8.1$  Hz, 1H), 5.68 (d,  $J = 8.3$  Hz, 1H), 4.78 (d,  $J = 6.1$  Hz, 1H), 4.53 – 4.41 (m, 1H), 4.36 (d,  $J = 7.2$  Hz, 2H), 4.29 – 4.15 (m, 2H), 3.23 – 2.95 (m, 2H), 1.85 (p,  $J = 6.5$  Hz, 1H), 1.74 – 1.57 (m, 3H), 1.43 (d,  $J = 6.3$  Hz, 23H), 0.89 (d,  $J = 5.8$  Hz, 6H).  $^{13}C$  {H} NMR (75 MHz,  $CDCl_3$ )  $\delta$  171.9, 171.5, 156.2, 143.9, 143.7, 141.3, 127.7, 127.1, 125.1, 120.0, 120.0, 81.9, 79.1, 67.1, 54.5, 51.5, 47.1, 41.4, 39.9, 32.4, 29.5, 28.4, 28.0, 24.9, 22.7, 22.3, 22.0.

**tert-butyl N-(((9H-fluoren-9-yl)methoxy)carbonyl)-S-trityl-L-cysteinyl-L-leucinate (7n)**<sup>13</sup>

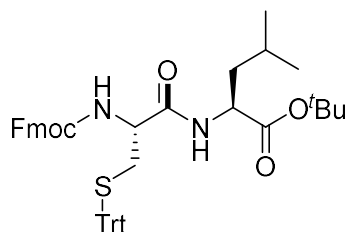

Yellow solid, 96% yield,  $R_f = 0.5$  (PE/EA = 4:1).  $^1H$  NMR (300 MHz,  $CDCl_3$ )  $\delta$  8.08 (d,  $J = 7.7$  Hz, 1H), 7.88 (d,  $J = 7.6$  Hz, 2H), 7.78 – 7.60 (m, 3H), 7.50 – 7.10 (m, 19H), 4.42 – 4.10 (m, 4H), 4.05 (q,  $J = 7.7$  Hz, 1H), 2.44 – 2.27 (m, 2H), 1.62 – 1.37 (m, 3H), 1.27 (s, 9H), 0.80 (dd,  $J = 17.4, 6.3$  Hz, 6H).  $^{13}C$  {H} NMR (75 MHz,  $CDCl_3$ )  $\delta$  171.4,

169.6, 155.9, 144.4, 143.8, 143.7, 141.3, 129.6, 128.1, 127.8, 127.1, 126.9, 125.1, 120.0, 81.9, 67.3, 67.1, 54.0, 51.6, 47.1, 41.7, 33.9, 27.9, 24.9, 22.7, 22.2.

**tert-butyl (((9H-fluoren-9-yl)methoxy)carbonyl)-L-methionyl-L-leucinate (7o)**

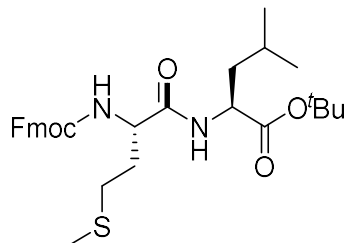

White solid, 97% yield,  $R_f = 0.4$  (PE/EA = 4:1).  $^1\text{H}$  NMR (300 MHz,  $\text{CDCl}_3$ )  $\delta$  7.75 (d,  $J = 7.5$  Hz, 2H), 7.59 (d,  $J = 7.4$  Hz, 2H), 7.39 (t,  $J = 7.4$  Hz, 2H), 7.35 – 7.23 (m, 2H), 6.80 (d,  $J = 8.1$  Hz, 1H), 5.87 (d,  $J = 8.3$  Hz, 1H), 4.56 – 4.32 (m, 4H), 4.22 (d,  $J = 7.2$  Hz, 1H), 2.61 (t,  $J = 7.3$  Hz, 2H), 2.18 – 1.90 (m, 5H), 1.72 – 1.58 (m, 2H), 1.57 – 1.38 (m, 10H), 0.92 (d,  $J = 5.7$  Hz, 6H).  $^{13}\text{C}\{\text{H}\}$  NMR (75 MHz,  $\text{CDCl}_3$ )  $\delta$  171.7, 170.9, 156.1, 143.8, 143.7, 141.3, 127.7, 127.1, 125.1, 125.1, 120.0, 120.0, 81.9, 67.1, 53.5, 51.6, 47.1, 41.5, 32.0, 29.9, 28.0, 24.9, 22.7, 22.1, 15.1. HRMS  $m/z$  (ESI) calcd for  $\text{C}_{30}\text{H}_{41}\text{N}_2\text{O}_5\text{S}^+$   $[\text{M}+\text{H}]^+$ : 541.2731, found: 541.2715.

**tert-butyl ((S)-2-(((9H-fluoren-9-yl)methoxy)carbonyl)amino)-5-(((Z)-amino ((2,2,4,6,7-pentamethyl-2,3-dihydrobenzofuran)-5-sulfonamido)methylene) amino)pentanoyl)-L-leucinate (7p)**

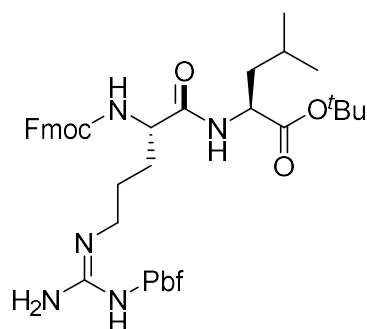

Colorless oil, 80% yield,  $R_f = 0.4$  (PE/EA = 1:1).  $^1\text{H}$  NMR (300 MHz,  $\text{CDCl}_3$ )  $\delta$  7.72 (d,  $J = 7.5$  Hz, 2H), 7.55 (d,  $J = 7.5$  Hz, 2H), 7.35 (t,  $J = 7.3$  Hz, 3H), 7.25 (d,  $J = 8.0$  Hz, 3H), 6.38 (s, 2H), 6.09 (d,  $J = 8.2$  Hz, 2H), 4.48 – 4.26 (m, 4H), 4.13 (t,  $J = 7.0$  Hz, 1H), 3.24 (s, 2H), 2.89 (s, 2H), 2.59 (s, 3H), 2.51 (s, 3H), 2.06 (s, 3H), 2.00 – 1.89 (m,

1H), 1.80 – 1.68 (m, 1H), 1.68 – 1.49 (m, 5H), 1.41 (d,  $J = 2.7$  Hz, 15H), 0.83 (d,  $J = 6.2$  Hz, 6H).  $^{13}\text{C}\{\text{H}\}$  NMR (75 MHz,  $\text{CDCl}_3$ )  $\delta$  172.5, 172.1, 158.7, 156.4, 143.9, 143.7, 141.2, 141.2, 138.4, 132.9, 132.3, 127.7, 127.1, 125.2, 124.6, 119.9, 117.5, 86.4, 81.9, 67.1, 60.4, 53.9, 51.9, 47.0, 43.2, 40.5, 28.6, 28.0, 25.1, 24.8, 22.7, 21.8, 19.4, 18.0, 14.2, 12.5. HRMS  $m/z$  (ESI) calcd for  $\text{C}_{44}\text{H}_{60}\text{N}_5\text{O}_8\text{S}^+$   $[\text{M}+\text{H}]^+$ : 818.4157, found: 818.4140.

**tert-butyl ((S)-2-(((9H-fluoren-9-yl)methoxy)carbonyl)amino)-4-(tert-butoxy)-4-oxobutanoyl)-L-leucinate (7q)**

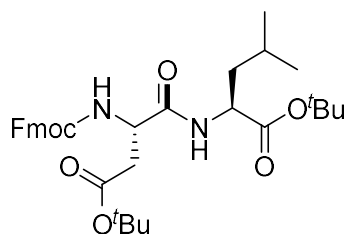

Colorless oil, 95% yield,  $R_f = 0.3$  (PE/EA = 4:1).  $^1\text{H}$  NMR (300 MHz,  $\text{CDCl}_3$ )  $\delta$  7.67 (d,  $J = 7.5$  Hz, 2H), 7.50 (d,  $J = 7.4$  Hz, 2H), 7.31 (t,  $J = 7.4$  Hz, 2H), 7.22 (t,  $J = 7.4$  Hz, 2H), 6.87 (d,  $J = 8.2$  Hz, 1H), 5.97 (d,  $J = 8.4$  Hz, 1H), 4.49 (q,  $J = 6.6$  Hz, 1H), 4.44 – 4.26 (m, 3H), 4.14 (t,  $J = 7.1$  Hz, 1H), 2.85 (dd,  $J = 17.3, 4.3$  Hz, 1H), 2.54 (dd,  $J = 17.2, 6.8$  Hz, 1H), 1.66 – 1.29 (m, 21H), 0.84 (d,  $J = 6.0$  Hz, 6H).  $^{13}\text{C}\{\text{H}\}$  NMR (75 MHz,  $\text{CDCl}_3$ )  $\delta$  171.5, 171.4, 170.2, 156.0, 143.8, 143.7, 141.3, 127.8, 127.1, 125.1, 120.0, 81.9, 81.8, 67.3, 51.6, 51.0, 47.1, 41.6, 37.7, 28.0, 28.0, 24.8, 22.9, 22.0. HRMS  $m/z$  (ESI) calcd for  $\text{C}_{33}\text{H}_{44}\text{N}_2\text{NaO}_7^+$   $[\text{M}+\text{Na}]^+$ : 603.3041, found: 603.3027.

**tert-butyl (S)-4-(((9H-fluoren-9-yl)methoxy)carbonyl)amino)-5-(((S)-1-(tert-butoxy)-4-methyl-1-oxopentan-2-yl)amino)-5-oxopentanoate (7r)**

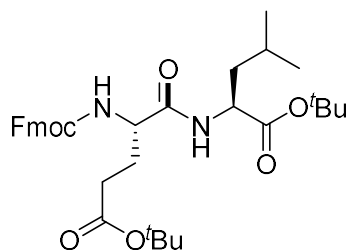

Yellow oil, 93% yield,  $R_f = 0.7$  (PE/EA = 5:1).  $^1\text{H}$  NMR (300 MHz,  $\text{CDCl}_3$ )  $\delta$  7.76 (d,  $J = 7.4$  Hz, 2H), 7.59 (d,  $J = 7.3$  Hz, 2H), 7.39 (t,  $J = 7.4$  Hz, 2H), 7.30 (t,  $J = 7.4$  Hz, 2H), 6.77 (d,  $J = 7.8$  Hz, 1H), 5.79 (d,  $J = 7.6$  Hz, 1H), 4.54 – 4.41 (m, 1H), 4.36 (d,  $J = 7.1$  Hz, 2H), 4.32 – 4.25 (m, 1H), 4.21 (t,  $J = 7.1$  Hz, 1H), 2.54 – 2.35 (m, 2H), 2.20 – 2.02 (m, 1H), 2.02 – 1.92 (m, 1H), 1.74 – 1.60 (m, 2H), 1.58 – 1.32 (m, 20H), 0.92 (d,  $J = 5.6$  Hz, 6H).  $^{13}\text{C}$  {H} NMR (75 MHz,  $\text{CDCl}_3$ )  $\delta$  173.0, 171.6, 170.9, 156.1, 143.9, 143.7, 141.3, 141.3, 127.7, 127.1, 125.1, 120.0, 81.9, 81.0, 67.1, 53.9, 51.7, 47.1, 41.5, 31.6, 28.6, 28.1, 28.0, 24.9, 22.8, 22.0. HRMS  $m/z$  (ESI) calcd for  $\text{C}_{34}\text{H}_{47}\text{N}_2\text{O}_7^+$   $[\text{M}+\text{H}]^+$ : 595.3378, found: 595.3362.

**tert-butyl  $\text{N}^2$ -(((9H-fluoren-9-yl)methoxy)carbonyl)- $\text{N}^5$ -trityl-L-glutaminyll-L-leucinate (7s)**

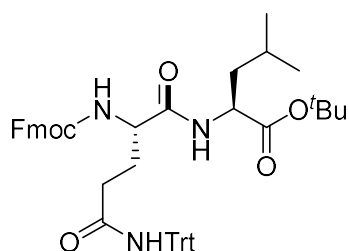

Yellow solid, 91% yield,  $R_f = 0.3$  (PE/EA = 2:1).  $^1\text{H}$  NMR (300 MHz,  $\text{CDCl}_3$ )  $\delta$  7.66 (d,  $J = 7.5$  Hz, 2H), 7.49 (d,  $J = 7.4$  Hz, 2H), 7.29 (t,  $J = 7.5$  Hz, 2H), 7.26 – 7.09 (m, 17H), 7.06 (s, 1H), 6.82 (d,  $J = 7.6$  Hz, 1H), 5.79 (d,  $J = 7.2$  Hz, 1H), 4.26 (d,  $J = 6.9$  Hz, 3H), 4.18 – 4.07 (m, 1H), 4.08 – 3.96 (m, 1H), 2.44 (t,  $J = 6.5$  Hz, 2H), 2.09 – 1.82 (m, 3H), 1.55 – 1.38 (m, 2H), 1.33 (s, 9H), 0.77 (d,  $J = 5.9$  Hz, 6H).  $^{13}\text{C}$  {H} NMR (75 MHz,  $\text{CDCl}_3$ )  $\delta$  172.0, 171.9, 171.2, 156.1, 144.6, 143.9, 143.8, 141.3, 141.3, 128.7, 128.0, 127.7, 127.1, 127.0, 125.2, 120.0, 81.7, 70.7, 67.0, 53.5, 51.7, 47.2, 40.7, 33.4, 30.1, 28.0, 24.8, 22.8, 21.8. HRMS  $m/z$  (ESI) calcd for  $\text{C}_{49}\text{H}_{54}\text{N}_3\text{O}_6^+$   $[\text{M}+\text{H}]^+$ : 780.4007, found: 780.3986.

**tert-butyl  $\text{N}^2$ -(((9H-fluoren-9-yl)methoxy)carbonyl)- $\text{N}^4$ -trityl-L-asparaginyll-L-leucinate (7t)**

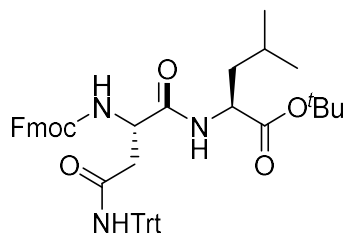

White solid, 90% yield,  $R_f = 0.4$  (PE/EA = 2:1).  $^1\text{H NMR}$  (300 MHz,  $\text{CDCl}_3$ )  $\delta$  7.79 (d,  $J = 7.4$  Hz, 2H), 7.60 (d,  $J = 7.4$  Hz, 2H), 7.44 (d,  $J = 7.4$  Hz, 2H), 7.38 – 7.10 (m, 19H), 7.03 (s, 1H), 6.49 (d,  $J = 7.4$  Hz, 1H), 4.67 – 4.54 (m, 1H), 4.49 – 4.32 (m, 3H), 4.22 (t,  $J = 7.2$  Hz, 1H), 3.10 (d,  $J = 15.2$  Hz, 1H), 2.72 (dd,  $J = 15.6, 6.4$  Hz, 1H), 1.71 – 1.54 (m, 2H), 1.53 – 1.36 (m, 10H), 0.91 (d,  $J = 4.9$  Hz, 6H).  $^{13}\text{C}\{\text{H}\}$  NMR (75 MHz,  $\text{CDCl}_3$ )  $\delta$  170.9, 170.2, 155.8, 143.8, 143.3, 143.2, 140.8, 140.8, 128.2, 127.5, 127.2, 126.6, 124.7, 119.5, 81.1, 70.4, 66.8, 51.4, 50.6, 46.6, 40.5, 38.0, 27.5, 24.4, 22.2, 21.6. HRMS  $m/z$  (ESI) calcd for  $\text{C}_{48}\text{H}_{52}\text{N}_3\text{O}_6^+$   $[\text{M}+\text{H}]^+$ : 766.3851, found: 766.3839.

**tert-butyl ((benzyloxy)carbonyl)-L-alanyl-L-leucinate (7u)** <sup>14</sup>

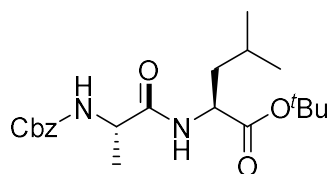

White solid, 95% yield,  $R_f = 0.2$  (PE/EA = 5:1).  $^1\text{H NMR}$  (300 MHz,  $\text{CDCl}_3$ )  $\delta$  7.43 – 7.27 (m, 5H), 6.70 (d,  $J = 6.1$  Hz, 1H), 5.65 (d,  $J = 6.5$  Hz, 1H), 5.08 (s, 2H), 4.52 – 4.40 (m, 1H), 4.39 – 4.21 (m, 1H), 1.68 – 1.53 (m, 2H), 1.50 – 1.40 (m, 10H), 1.36 (d,  $J = 6.9$  Hz, 3H), 0.90 (d,  $J = 5.5$  Hz, 6H).  $^{13}\text{C}\{\text{H}\}$  NMR (75 MHz,  $\text{CDCl}_3$ )  $\delta$  172.0, 171.8, 155.8, 136.2, 128.5, 128.1, 127.9, 81.8, 66.8, 51.4, 50.3, 41.5, 27.9, 24.8, 22.7, 22.0, 18.8.

**tert-butyl (tert-butoxycarbonyl)-L-alanyl-L-leucinate (7v)** <sup>15</sup>

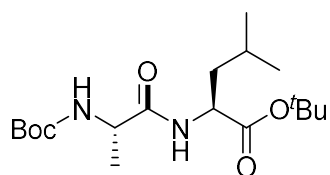

White solid, 91% yield,  $R_f = 0.55$  (PE/EA = 2:1).  $^1\text{H NMR}$  (300 MHz,  $\text{CDCl}_3$ )  $\delta$  6.58 (d,  $J = 7.6$  Hz, 1H), 5.15 (d,  $J = 7.2$  Hz, 1H), 4.44 (q,  $J = 8.3$  Hz, 1H), 4.17 (s, 1H), 1.69



– 1.50 (m, 3H), 1.42 (s, 9H), 1.41 (s, 9H), 1.32 (d,  $J = 7.0$  Hz, 3H), 0.89 (d,  $J = 6.0$  Hz, 6H).  $^{13}\text{C}\{\text{H}\}$  NMR (75 MHz,  $\text{CDCl}_3$ )  $\delta$  172.2, 171.9, 155.4, 81.7, 79.9, 51.3, 49.9, 41.7, 28.3, 27.9, 24.8, 22.8, 22.0, 18.3.

**methyl N-(((9H-fluoren-9-yl)methoxy)carbonyl)-L-alanyl)-N-methyl-L-leucinate (7w)**

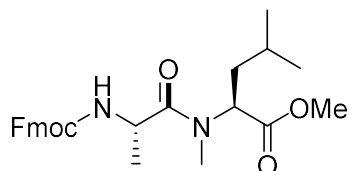

White solid, 93% yield,  $R_f = 0.25$  (PE/EA = 5:1).  $^1\text{H}$  NMR (300 MHz,  $\text{CDCl}_3$ )  $\delta$  7.76 (d,  $J = 7.5$  Hz, 2H), 7.60 (d,  $J = 7.5$  Hz, 2H), 7.39 (t,  $J = 7.5$  Hz, 2H), 7.31 (t,  $J = 7.4$  Hz, 2H), 5.85 (d,  $J = 8.0$  Hz, 1H), 5.39 – 5.24 (m, 1H), 4.72 (p,  $J = 7.1$  Hz, 1H), 4.36 (d,  $J = 7.3$  Hz, 2H), 4.21 (t,  $J = 7.3$  Hz, 1H), 3.70 (s, 3H), 2.98 (s, 3H), 1.81 – 1.66 (m, 2H), 1.58 – 1.45 (m, 1H), 1.40 (d,  $J = 6.8$  Hz, 3H), 0.94 (t,  $J = 6.8$  Hz, 6H).  $^{13}\text{C}\{\text{H}\}$  NMR (75 MHz,  $\text{CDCl}_3$ )  $\delta$  173.4, 172.0, 155.6, 144.0, 143.8, 141.3, 127.7, 127.1, 125.2, 125.2, 120.0, 67.0, 54.7, 52.3, 47.3, 47.2, 36.9, 31.0, 24.9, 23.2, 21.4, 18.6. HRMS  $m/z$  (ESI) calcd for  $\text{C}_{26}\text{H}_{33}\text{N}_2\text{O}_5^+$   $[\text{M}+\text{H}]^+$ : 453.2384, found: 453.2371.

**tert-butyl N-(((9H-fluoren-9-yl)methoxy)carbonyl)-N-methyl-L-alanyl-L-leucinate (7x)**

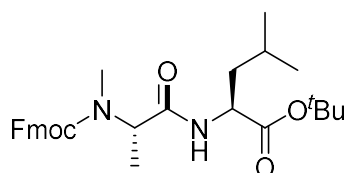

Yellow oil, 94% yield,  $R_f = 0.65$  (PE/EA = 4:1).  $^1\text{H}$  NMR (300 MHz,  $\text{CDCl}_3$ )  $\delta$  7.77 (d,  $J = 7.5$  Hz, 2H), 7.58 (d,  $J = 7.3$  Hz, 2H), 7.40 (t,  $J = 7.4$  Hz, 2H), 7.31 (t,  $J = 7.4$  Hz, 2H), 6.38 (s, 1H), 4.81 (s, 1H), 4.56 – 4.39 (m, 3H), 4.26 (t,  $J = 6.8$  Hz, 1H), 2.84 (s, 3H), 1.68 – 1.52 (m, 2H), 1.50 – 1.39 (m, 10H), 1.34 (d,  $J = 7.1$  Hz, 3H), 0.90 (d,  $J = 5.4$  Hz, 6H).  $^{13}\text{C}\{\text{H}\}$  NMR (75 MHz,  $\text{CDCl}_3$ )  $\delta$  171.8, 170.6, 157.0, 143.8, 141.3, 127.8,

127.1, 124.9, 120.0, 81.9, 67.9, 54.4, 51.3, 47.2, 41.6, 29.6, 28.0, 25.0, 22.8, 22.0, 13.7.  
HRMS m/z (ESI) calcd for C<sub>29</sub>H<sub>38</sub>N<sub>2</sub>NaO<sub>5</sub><sup>+</sup> [M+H]<sup>+</sup>: 517.2673, found:517.2665.

**methyl N-(N-(((9H-fluoren-9-yl)methoxy)carbonyl)-N-methyl-L-alanyl)-N-methyl-L-leucinate (7y)**

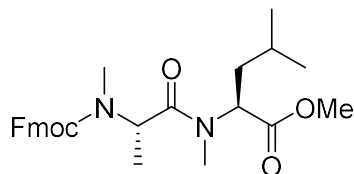

Yellow oil, 94% yield, R<sub>f</sub> = 0.6 (PE/EA = 4:1). <sup>1</sup>H NMR (300 MHz, DMSO-*d*<sub>6</sub>) δ 7.89 (d, *J* = 7.3 Hz, 2H), 7.63 (t, *J* = 6.8 Hz, 2H), 7.42 (t, *J* = 7.4 Hz, 2H), 7.38 – 7.29 (m, 2H), 5.09 – 4.48 (m, 3H), 4.47 – 4.09 (m, 2H), 3.61 (s, 3H), 2.87 – 2.54 (m, 3H), 2.51 – 2.34 (m, 2H), 1.87 – 1.51 (m, 2H), 1.35 – 1.21 (m, 1H), 1.11 (d, *J* = 6.7 Hz, 2H), 0.99 – 0.73 (m, 7H). <sup>13</sup>C {<sup>1</sup>H} NMR (75 MHz, DMSO-*d*<sub>6</sub>) δ 172.0, 171.8, 171.5, 170.5, 155.5, 144.2, 141.3, 128.1, 128.0, 127.5, 125.3, 125.2, 125.1, 120.6, 120.5, 66.9, 56.8, 55.0, 52.4, 51.5, 51.1, 47.4, 38.2, 37.1, 31.4, 29.7, 29.5, 29.1, 28.7, 24.9, 24.8, 23.6, 23.2, 21.8, 21.4, 14.9, 14.6. HRMS m/z (ESI) calcd for C<sub>27</sub>H<sub>35</sub>N<sub>2</sub>O<sub>5</sub><sup>+</sup> [M+H]<sup>+</sup>: 467.2540, found: 467.2532.

**methyl (((9H-fluoren-9-yl)methoxy)carbonyl)-L-alanyl-L-prolinate (7z) <sup>16</sup>**

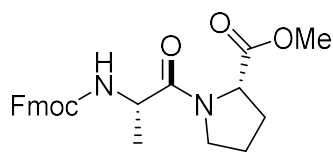

Colorless oil, 91% yield, R<sub>f</sub> = 0.2 (PE/EA = 2:1). <sup>1</sup>H NMR (300 MHz, CDCl<sub>3</sub>) δ 7.64 (d, *J* = 7.5 Hz, 2H), 7.49 (dd, *J* = 7.5, 2.9 Hz, 2H), 7.28 (t, *J* = 7.4 Hz, 2H), 7.19 (t, *J* = 7.5 Hz, 2H), 5.77 (d, *J* = 8.0 Hz, 1H), 4.54 – 4.37 (m, 2H), 4.31 – 4.16 (m, 2H), 4.10 (t, *J* = 7.2 Hz, 1H), 3.69 – 3.38 (m, 5H), 2.20 – 2.02 (m, 1H), 2.01 – 1.75 (m, 3H), 1.32 (d, *J* = 6.8 Hz, 3H). <sup>13</sup>C {<sup>1</sup>H} NMR (75 MHz, CDCl<sub>3</sub>) δ 172.3, 171.3, 155.7, 143.9, 143.8, 141.2, 127.7, 127.1, 125.2, 119.9, 67.0, 58.8, 52.3, 48.3, 47.1, 46.8, 28.9, 24.9, 18.3.

**methyl (((9H-fluoren-9-yl)methoxy)carbonyl)-L-alanyl-L-serinate (7aa)**

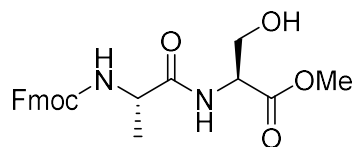

Colorless oil, 90% yield,  $R_f = 0.2$  (PE/EA = 1:1).  $^1\text{H}$  NMR (300 MHz, DMSO- $d_6$ )  $\delta$  8.19 (d,  $J = 7.7$  Hz, 1H), 7.89 (d,  $J = 7.5$  Hz, 2H), 7.79 – 7.67 (m, 2H), 7.56 (d,  $J = 7.7$  Hz, 1H), 7.42 (t,  $J = 7.4$  Hz, 2H), 7.34 (d,  $J = 7.4$  Hz, 2H), 5.09 (t,  $J = 5.5$  Hz, 1H), 4.40 – 4.32 (m, 1H), 4.30 – 4.13 (m, 4H), 3.77 – 3.68 (m, 1H), 3.62 (s, 4H), 1.23 (d,  $J = 7.1$  Hz, 3H).  $^{13}\text{C}$  NMR (75 {H} MHz, DMSO- $d_6$ )  $\delta$  172.9, 171.1, 155.7, 143.9, 143.8, 140.7, 127.7, 127.1, 125.3, 120.1, 65.6, 61.3, 54.6, 51.9, 49.7, 46.7, 18.3. HRMS  $m/z$  (ESI) calcd for  $\text{C}_{22}\text{H}_{25}\text{N}_2\text{O}_6^+$   $[\text{M}+\text{H}]^+$ : 413.1707, found: 413.1717.

**tert-butyl (((9H-fluoren-9-yl)methoxy)carbonyl)-L-alanyl-L-glutamate (7ab) <sup>8</sup>**

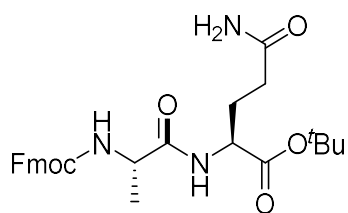

White solid, 93% yield,  $R_f = 0.3$  (PE/EA = 4:1).  $^1\text{H}$  NMR (300 MHz, DMSO- $d_6$ )  $\delta$  8.13 (d,  $J = 7.2$  Hz, 1H), 7.82 (d,  $J = 7.4$  Hz, 2H), 7.73 – 7.61 (m, 2H), 7.47 (d,  $J = 7.7$  Hz, 1H), 7.35 (t,  $J = 7.3$  Hz, 2H), 7.31 – 7.19 (m, 3H), 6.75 (s, 1H), 4.18 (d,  $J = 6.7$  Hz, 3H), 4.10 – 3.93 (m, 2H), 2.10 (t,  $J = 7.5$  Hz, 2H), 1.87 (dd,  $J = 14.9, 7.3$  Hz, 1H), 1.73 (dt,  $J = 13.9, 8.0$  Hz, 1H), 1.32 (s, 9H), 1.19 (d,  $J = 7.0$  Hz, 3H).  $^{13}\text{C}$  {H} NMR (75 MHz, DMSO- $d_6$ )  $\delta$  173.8, 173.2, 171.4, 156.1, 144.4, 144.2, 141.2, 128.1, 127.5, 125.8, 120.5, 80.9, 66.1, 52.8, 50.1, 47.1, 31.6, 28.0, 27.1, 18.7.

**methyl (((9H-fluoren-9-yl)methoxy)carbonyl)-L-alanyl-L-tyrosinate (7ac)**

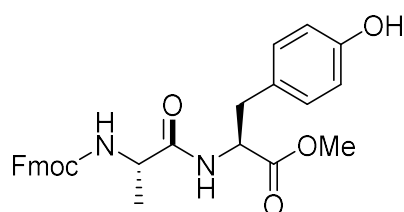

White solid, 99% yield,  $R_f = 0.2$  (PE/EA = 1:1).  $^1\text{H}$  NMR (300 MHz,  $\text{DMSO-}d_6$ )  $\delta$  10.93 (s, 1H), 8.45 – 8.23 (m, 1H), 7.88 (d,  $J = 7.5$  Hz, 2H), 7.75 (t,  $J = 6.8$  Hz, 2H), 7.63 – 7.48 (m, 2H), 7.50 – 7.26 (m, 5H), 7.30 – 7.16 (m, 1H), 7.09 (t,  $J = 7.5$  Hz, 1H), 7.01 (t,  $J = 7.4$  Hz, 1H), 4.59 (q,  $J = 7.1$  Hz, 1H), 4.42 – 4.09 (m, 4H), 3.58 (s, 3H), 3.30 – 3.04 (m, 2H), 1.27 (d,  $J = 7.0$  Hz, 3H).  $^{13}\text{C}\{\text{H}\}$  NMR (75 MHz,  $\text{DMSO-}d_6$ )  $\delta$  173.0, 172.3, 156.3, 155.9, 144.2, 144.1, 141.0, 130.3, 127.9, 127.4, 127.3, 125.6, 120.4, 115.4, 65.9, 54.3, 52.1, 50.0, 47.0, 36.2, 18.5. HRMS  $m/z$  (ESI) calcd for  $\text{C}_{28}\text{H}_{29}\text{N}_2\text{O}_6^+$   $[\text{M}+\text{H}]^+$ : 489.2020, found: 489.2010.

**methyl (((9H-fluoren-9-yl)methoxy)carbonyl)-L-alanyl-L-tryptophanate (7ad)**

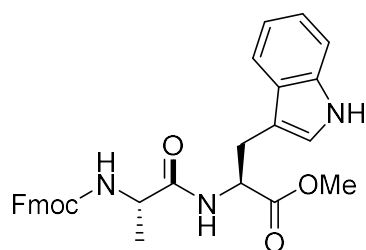

White solid, 90% yield,  $R_f = 0.3$  (PE/EA = 2:1).  $^1\text{H}$  NMR (300 MHz,  $\text{DMSO-}d_6$ )  $\delta$  10.93 (s, 1H), 8.46 – 8.22 (m, 1H), 7.88 (d,  $J = 7.5$  Hz, 2H), 7.75 (t,  $J = 6.9$  Hz, 2H), 7.54 (dd,  $J = 12.6, 7.9$  Hz, 2H), 7.37 (dq,  $J = 15.7, 7.5$  Hz, 5H), 7.23 (s, 0H), 7.09 (t,  $J = 7.5$  Hz, 1H), 7.01 (t,  $J = 7.4$  Hz, 1H), 4.59 (q,  $J = 7.1$  Hz, 1H), 4.39 – 4.08 (m, 4H), 3.58 (s, 3H), 3.30 – 3.03 (m, 2H), 1.27 (d,  $J = 7.1$  Hz, 3H).  $^{13}\text{C}\{\text{H}\}$  NMR (75 MHz,  $\text{DMSO-}d_6$ )  $\delta$  173.2, 172.7, 156.1, 144.4, 144.2, 141.2, 136.5, 128.1, 127.5, 125.8, 124.2, 121.4, 120.5, 118.9, 118.4, 111.9, 109.7, 66.1, 53.6, 52.3, 50.2, 47.1, 27.5, 18.7. HRMS  $m/z$  (ESI) calcd for  $\text{C}_{30}\text{H}_{30}\text{N}_3\text{O}_5^+$   $[\text{M}+\text{H}]^+$ : 512.2180, found: 512.2173.

**(9H-fluoren-9-yl)methyl ((S)-1-(((S)-1-amino-1-oxopropan-2-yl)amino)-1-oxopropan-2-yl)carbamate (7ae)**

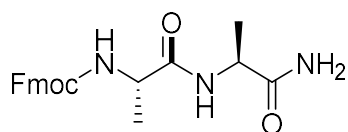

White solid, 91% yield,  $R_f = 0.3$  (PE/EA = 4:1).  $^1\text{H}$  NMR (300 MHz,  $\text{DMSO-}d_6$ )  $\delta$  8.08 (s, 1H), 7.90 (d,  $J = 6.2$  Hz, 2H), 7.73 (s, 2H), 7.64 (s, 1H), 7.53 – 7.21 (m, 5H), 7.09

(s, 1H), 4.39 – 4.11 (m, 4H), 4.05 (s, 1H), 1.31 – 1.10 (m, 6H);  $^{13}\text{C}\{\text{H}\}$  NMR (75 MHz, DMSO- $d_6$ )  $\delta$  174.6, 172.6, 156.3, 144.2, 141.1, 128.1, 127.5, 125.7, 120.6, 66.1, 50.6, 48.4, 47.0, 18.7, 18.3. HRMS  $m/z$  (ESI) calcd for  $\text{C}_{21}\text{H}_{23}\text{N}_3\text{NaO}_4^+$   $[\text{M}+\text{H}]^+$ : 404.1581, found: 404.1574.

**tert-butyl ((S)-2-((tert-butoxycarbonyl)amino)-3,3-dimethylbutanoyl)-L-leucinate (7af)**

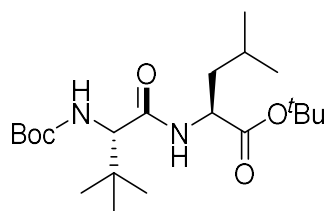

Yellow solid, 94% yield,  $R_f = 0.55$  (PE/EA = 5:1).  $^1\text{H}$  NMR (300 MHz,  $\text{CDCl}_3$ )  $\delta$  6.01 (d,  $J = 8.3$  Hz, 1H), 5.24 (d,  $J = 9.5$  Hz, 1H), 4.56 – 4.40 (m, 1H), 3.81 (d,  $J = 9.5$  Hz, 1H), 1.69 – 1.53 (m, 2H), 1.52 – 1.46 (m, 1H), 1.44 (s, 9H), 1.41 (s, 9H), 0.99 (s, 9H), 0.91 (d,  $J = 5.9$  Hz, 6H).  $^{13}\text{C}\{\text{H}\}$  NMR (75 MHz,  $\text{CDCl}_3$ )  $\delta$  171.7, 170.5, 155.8, 81.8, 79.6, 62.5, 51.4, 41.9, 34.5, 28.3, 27.9, 26.5, 24.8, 22.7, 22.1. HRMS  $m/z$  (ESI) calcd for  $\text{C}_{21}\text{H}_{41}\text{N}_2\text{O}_5^+$   $[\text{M}+\text{H}]^+$ : 401.3010, found: 401.2999.

**tert-butyl 2-(2-(((9H-fluoren-9-yl)methoxy)carbonyl)amino)-2-methylpropanamido)-2-methylpropanoate (7ag) <sup>8</sup>**

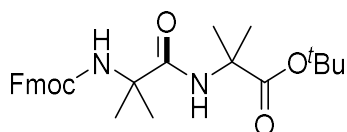

White solid, 91% yield,  $R_f = 0.4$  (PE/EA = 3:1).  $^1\text{H}$  NMR (300 MHz,  $\text{CDCl}_3$ )  $\delta$  7.76 (d,  $J = 7.4$  Hz, 2H), 7.62 (d,  $J = 7.3$  Hz, 2H), 7.40 (t,  $J = 7.3$  Hz, 2H), 7.32 (t,  $J = 7.4$  Hz, 2H), 6.95 (s, 1H), 5.66 (s, 1H), 4.40 (d,  $J = 6.2$  Hz, 2H), 4.22 (t,  $J = 6.7$  Hz, 1H), 1.54 (s, 12H), 1.46 (s, 9H).  $^{13}\text{C}\{\text{H}\}$  NMR (75 MHz,  $\text{CDCl}_3$ )  $\delta$  173.8, 173.3, 155.0, 143.9, 141.3, 127.7, 127.1, 125.1, 120.0, 81.6, 66.5, 56.9, 56.8, 47.2, 27.8, 25.3, 24.2.

**Leuphasyl (L-Ala) (7ah)**

A 10 mL round-bottomed flask was charged with **1ah** (Cbz-*L*-Tyr(O<sup>t</sup>Bu)-*L*-Ala-Gly-OH, 0.30 mmol), **TFPN** (0.36 mmol), DIPEA (0.36 mmol) and DMF (1 mL). The reaction solution was stirred at room temperature for 10 min. Then amine **5** (NH<sub>2</sub>-*L*-Phe-*L*-Leu-O<sup>t</sup>Bu, 0.36 mmol) was added to the above solution and the reaction mixture was stirred at room temperature under air until the acyl fluoride intermediate was fully consumed. After these reactions were finished, water (20 mL) was added followed by EtOAc (3 x 10 mL), and the layers were separated. Combined organic layers were washed with brine (1 x 20 mL), dried over Na<sub>2</sub>SO<sub>4</sub>, filtered, and concentrated in vacuum. The crude product was purified by silica gel chromatography to afford **7ah**.

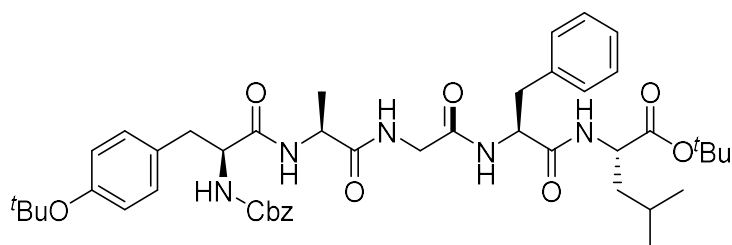

White solid, 92% yield,  $R_f = 0.3$  (DCM/MeOH = 10:1). <sup>1</sup>H NMR (300 MHz, CDCl<sub>3</sub>)  $\delta$  8.44 – 7.47 (m, 3H), 7.39 – 7.23 (m, 5H), 7.25 – 6.87 (m, 8H), 6.81 (d,  $J = 7.2$  Hz, 2H), 6.64 (s, 1H), 5.31 (s, 1H), 5.13 (d,  $J = 12.3$  Hz, 2H), 5.00 (d,  $J = 12.4$  Hz, 1H), 4.83 (s, 1H), 4.52 (s, 2H), 3.90 (d,  $J = 16.6$  Hz, 1H), 3.23 – 2.77 (m, 4H), 2.10 – 1.84 (m, 1H), 1.70 – 1.54 (m, 2H), 1.49 – 1.36 (m, 12H), 1.27 (s, 9H), 0.95 – 0.79 (m, 6H). <sup>13</sup>C {<sup>1</sup>H} NMR (75 MHz, CDCl<sub>3</sub>)  $\delta$  172.8, 172.1, 171.4, 170.7, 168.5, 156.5, 154.2, 136.9, 136.6, 131.8, 130.0, 129.7, 128.4, 128.3, 128.0, 127.9, 126.7, 124.1, 81.8, 78.3, 66.8, 56.2, 53.8, 51.5, 48.6, 43.2, 42.0, 39.7, 28.9, 28.1, 25.0, 22.7, 22.6, 20.7. HRMS  $m/z$  (ESI) calcd for C<sub>45</sub>H<sub>62</sub>N<sub>5</sub>O<sub>9</sub><sup>+</sup> [M+H]<sup>+</sup>: 816.4542, found: 816.4536.

## The synthesis of protected Leu-enkephalin

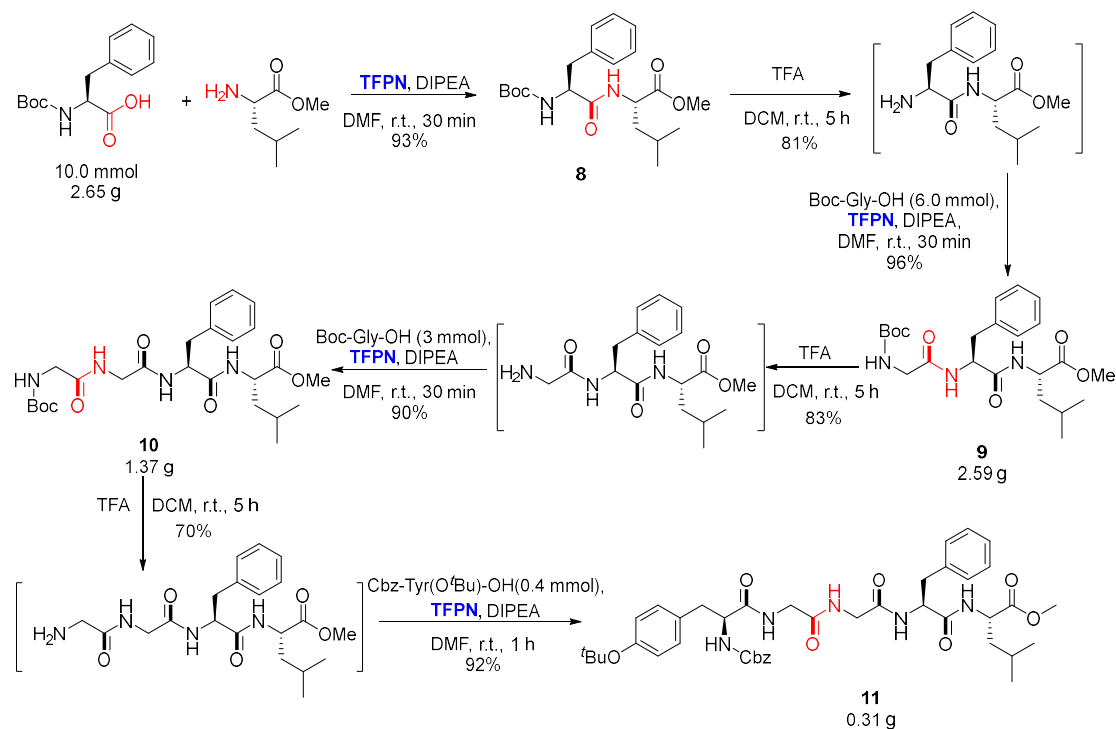

### **Boc-L-Phe-L-Leu-OMe (8)**<sup>17</sup>:

A 10 mL round-bottomed flask was charged with **Boc-L-Phe-OH** (10 mmol, 2.65 g), **TFPN** (11 mmol), **DIPEA** (12 mmol) and **DMF** (15 mL). The reaction solution was stirred at room temperature for 10 min. Then amine **5** ( $\text{NH}_2\text{-L-Leu-OMe}$ , 12 mmol) was added to the above solution and the reaction mixture was stirred at room temperature under air until the acyl fluorides intermediates was fully consumed. After these reactions were finished, water (50 mL) was added followed by **EtOAc** (3 x 20 mL) and the layers were separated. Combined organic layers was washed with brine (1 x 30 mL), dried over  $\text{Na}_2\text{SO}_4$ , filtered and concentrated in vacuum. The crude product was purified by silica gel chromatography to afford **8** (93%, 3.65g).

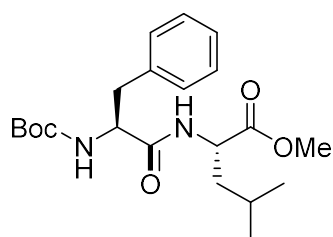

$^1\text{H}$  NMR (300 MHz,  $\text{CDCl}_3$ )  $\delta$  7.38 – 7.14 (m, 5H), 6.28 (s, 1H), 5.02 (s, 1H), 4.69 – 4.49 (m, 1H), 4.45 – 4.25 (m, 1H), 3.69 (s, 3H), 3.07 (d,  $J = 6.4$  Hz, 2H), 1.64 – 1.45 (m, 3H), 1.42 (s, 9H), 0.90 (t,  $J = 5.0$  Hz, 6H).  $^{13}\text{C}\{\text{H}\}$  NMR (75 MHz,  $\text{CDCl}_3$ )  $\delta$  172.8, 170.9, 155.4, 136.6, 129.4, 128.6, 126.9, 80.2, 55.6, 52.3, 50.7, 41.6, 38.0, 28.2, 24.6, 22.8, 21.9.

**Boc-Gly-L-Phe-L-Leu-OMe (9)**<sup>17</sup>:

**8** (7.2 mmol, 2.82 g) was dissolved in 10 mL of DCM and TFA (6 mL) was added dropwise at 0 °C. The mixture was allowed to warm to room temperature and stirred for 4 h. After the reaction was finished, the solvent was removed under reduced pressure. Then  $\text{NaHCO}_3$  (30 mL, 2 M) was added and extracted with DCM (3 x 20 mL). The combined organic layers were washed with water (50 mL), brine (30 mL), dried over  $\text{Na}_2\text{SO}_4$ , filtered, and concentrated in vacuum. The crude product was used for further reaction without purification.

A 10 mL round-bottomed flask was charged with **Boc-Gly-OH** (6.0 mmol, 1.05 g), **TFPN** (6.6 mmol), DIPEA (7.2 mmol), and DMF (15 mL). The reaction solution was stirred at room temperature for 10 min. Then the crude amine (6.6 mmol) was added to the above solution and the reaction mixture was stirred at room temperature under air until the acyl fluoride intermediate was fully consumed. After these reactions were finished, water (40 mL) was added followed by EtOAc (3 x 20 mL), and the layers were separated. Combined organic layers were washed with brine (1 x 30 mL), dried over  $\text{Na}_2\text{SO}_4$ , filtered, and concentrated in vacuum. The crude product was purified by silica gel chromatography to afford **9** (96%, 2.59 g).

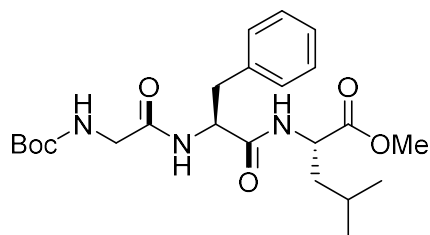



$^1\text{H}$  NMR (300 MHz,  $\text{CDCl}_3$ )  $\delta$  7.34 – 7.23 (m, 3H), 7.23 – 7.17 (m, 2H), 6.95 – 6.72 (m, 1H), 6.69 – 6.38 (m, 1H), 5.22 (s, 1H), 4.73 (d,  $J = 6.0$  Hz, 1H), 4.62 – 4.44 (m, 1H), 3.77 (s, 2H), 3.69 (s, 3H), 3.22 – 2.91 (m, 2H), 1.66 – 1.47 (m, 4H), 1.43 (s, 9H), 0.88 (d,  $J = 4.2$  Hz, 6H).  $^{13}\text{C}\{\text{H}\}$  NMR (75 MHz,  $\text{CDCl}_3$ )  $\delta$  172.8, 170.5, 169.5, 156.1, 136.4, 129.5, 128.7, 127.2, 80.5, 54.2, 52.4, 51.0, 44.5, 41.3, 38.2, 28.4, 24.8, 22.8, 22.0.

**Boc-Gly-Gly-L-Phe-L-Leu-OMe (10)** <sup>17</sup>:

**9** (3.6 mmol, 1.12 g) was dissolved in 5 mL of DCM and TFA (3 mL) was added dropwise at 0 °C. The mixture was allowed to warm to room temperature and stirred for 4 h. After the reaction was finished, the solvent was removed under reduced pressure. Then  $\text{NaHCO}_3$  (20 mL, 2 M) was added and extracted with DCM (3 x 15 mL). The combined organic layers were washed with water (30 mL), brine (30 mL), dried over  $\text{Na}_2\text{SO}_4$ , filtered, and concentrated in vacuum. The crude product was used for further reaction without purification.

A 10 mL round-bottomed flask was charged with **Boc-Gly-OH** (3.0 mmol, 0.53 g), **TFPN** (3.3 mmol), DIPEA (3.6 mmol), and DMF (15 mL). The reaction solution was stirred at room temperature for 10 min. Then the crude amine (3.6 mmol) was added to the above solution and the reaction mixture was stirred at room temperature under air until the acyl fluoride intermediate was fully consumed. After these reactions were finished, water (30 mL) was added followed by EtOAc (3 x 20 mL), and the layers were separated. Combined organic layers were washed with brine (1 x 30 mL), dried over  $\text{Na}_2\text{SO}_4$ , filtered, and concentrated in vacuum. The crude product was purified by silica gel chromatography to afford **10** (90%, 1.37 g).

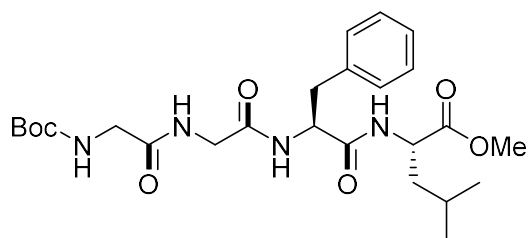

$^1\text{H}$  NMR (300 MHz,  $\text{CDCl}_3$ )  $\delta$  8.01 – 7.54 (m, 3H), 7.30 – 7.06 (m, 5H), 5.90 (s, 1H), 5.04 (s, 1H), 4.59 (s, 1H), 4.18 – 3.84 (m, 4H), 3.71 (s, 3H), 3.24 – 3.05 (m, 1H), 2.96 (s, 1H), 1.71 – 1.56 (m, 3H), 1.45 (s, 9H), 0.90 (s, 6H).  $^{13}\text{C}\{\text{H}\}$  NMR (75 MHz,  $\text{CDCl}_3$ )  $\delta$  173.1, 171.4, 169.9, 168.6, 156.2, 136.5, 129.4, 128.3, 126.8, 79.8, 54.2, 52.2, 50.9, 43.7, 42.9, 40.9, 39.0, 28.4, 24.8, 22.7, 21.9.

**Fmoc-L-Tyr(O<sup>t</sup>Bu)-Gly-Gly-L-Phe-L-Leu-OMe (11):**

**10** (0.48 mmol, 0.243 g) was dissolved in 1 mL of DCM, and TFA (1 mL) was added dropwise at 0 °C. The mixture was allowed to warm to room temperature and stirred for 4 h. After the reaction was finished, the solvent was removed under reduced pressure. Then  $\text{NaHCO}_3$  (10 mL, 2 M) was added and extracted with DCM (3 x 10 mL). The combined organic layers were washed with water (10 mL), brine (10 mL), dried over  $\text{Na}_2\text{SO}_4$ , filtered, and concentrated in vacuum. The crude product was used for further reaction without purification.

A 10 mL round-bottomed flask was charged with Fmoc-L-Tyr(O<sup>t</sup>Bu)-OH (0.4 mmol, 0.15 g), **TFPN** (0.44 mmol), DIPEA (0.48 mmol) and DMF (1 mL). The reaction solution was stirred at room temperature for 10 min. Then the crude amine (0.48 mmol) was added to the above solution and the reaction mixture was stirred at room temperature under air until the acyl fluoride intermediate was fully consumed. After these reactions were finished, water (20 mL) was added followed by EtOAc (3 x 10 mL) and the layers were separated. Combined organic layers were washed with brine (1 x 10 mL), dried over  $\text{Na}_2\text{SO}_4$ , filtered, and concentrated in vacuum. The crude product was purified by silica gel chromatography to afford **14** (92%, 0.31 g).

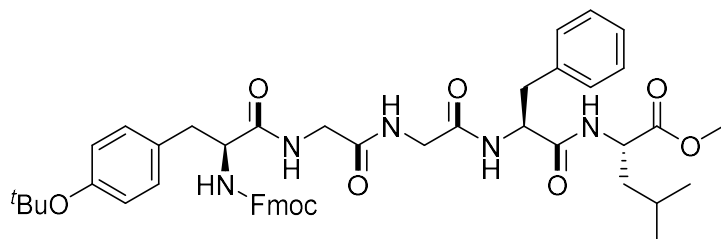

$^1\text{H}$  NMR (300 MHz,  $\text{CDCl}_3$ )  $\delta$  8.67 – 7.92 (m, 3H), 7.69 (d,  $J = 7.8$  Hz, 3H), 7.57 (d,  $J = 7.0$  Hz, 1H), 7.47 – 7.14 (m, 5H), 7.13 – 6.87 (m, 8H), 6.75 (d,  $J = 7.7$  Hz, 2H), 5.34 (s, 1H), 5.01 (s, 1H), 4.69 (s, 1H), 4.61 – 4.44 (m, 1H), 4.45 – 4.03 (m, 6H), 3.29 (s, 3H), 3.19 – 2.79 (m, 4H), 1.64 – 1.34 (m, 3H), 1.15 (s, 9H), 0.78 (s, 6H).  $^{13}\text{C}$  {H} NMR (75 MHz,  $\text{CDCl}_3$ )  $\delta$  172.9, 172.0, 170.6, 168.5, 168.1, 156.3, 154.1, 144.2, 143.8, 141.2, 136.4, 131.5, 130.0, 129.6, 128.1, 127.6, 127.0, 126.6, 125.6, 125.3, 123.9, 119.8, 78.1, 67.3, 55.5, 53.9, 51.8, 50.6, 46.9, 43.7, 43.3, 41.6, 39.9, 39.6, 28.7, 24.8, 22.6, 22.3. HRMS  $m/z$  (ESI) calcd for  $\text{C}_{48}\text{H}_{58}\text{N}_5\text{O}_9^+$   $[\text{M}+\text{H}]^+$ : 848.4229, found: 848.4224.

# HPLC studies for determining epimerization with Ser, Asn, Asp

## HPLC Studies for Determining Racemization of 7k

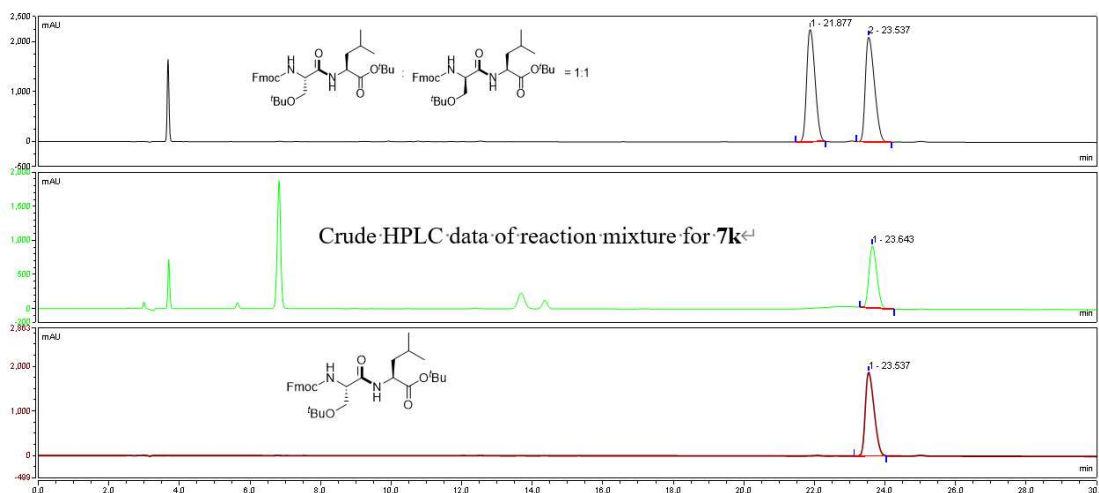

**HPLC condition:** Chiralpak®IC 250 × 4.6 mm column; hexanes (solvent A); isopropanol (solvent B); isocratic 15% solvent B in 30 min; flow rate = 1.0 mL/min; detection wavelength = 254 nm.

### (1) Mixed HPLC data of 7k and 7k'

| Peak No | RT (min) | Area (%) | Area      | Height (mAU) |
|---------|----------|----------|-----------|--------------|
| 1       | 21.877   | 49.64    | 615.1429  | 2250.94      |
| 2       | 23.537   | 50.36    | 624.0292  | 2095.08      |
| Total:  |          | 100.00   | 1239.1721 | 4346.02      |

### (2) Crude HPLC data of reaction mixture for preparing compound 7k

| Peak No | RT (min) | Area (%) | Area     | Height (mAU) |
|---------|----------|----------|----------|--------------|
| 1       | 23.643   | 100.00   | 236.0804 | 910.23       |
| Total:  |          | 100.00   | 236.0804 | 910.23       |

### (3) Pure HPLC data of 7k

| Peak No | RT (min) | Area (%) | Area     | Height (mAU) |
|---------|----------|----------|----------|--------------|
| 1       | 23.537   | 100.00   | 538.4030 | 1875.91      |
| Total:  |          | 100.00   | 538.4030 | 1875.91      |

## HPLC Studies for Determining Racemization of 7q

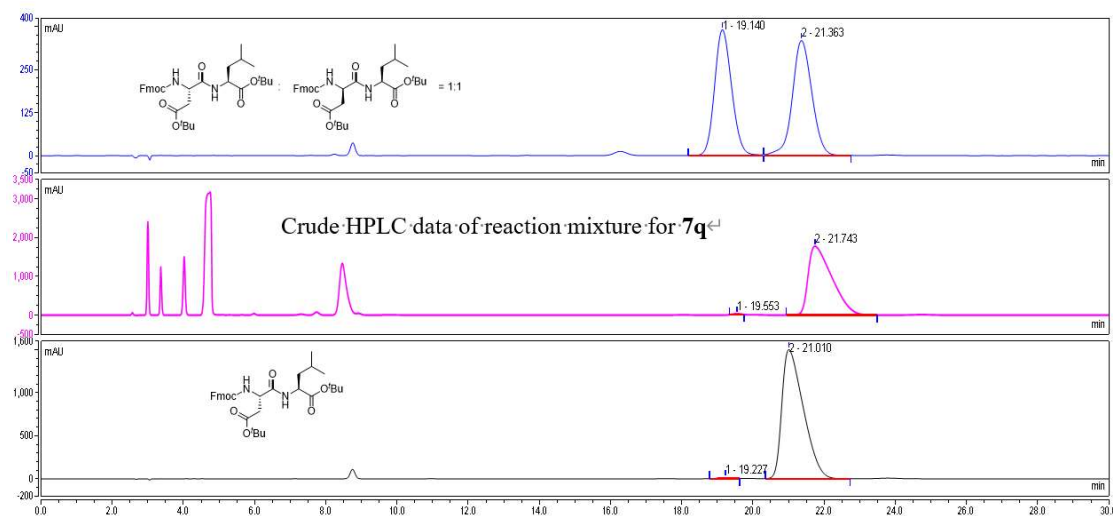

**HPLC condition:** Chiralpak®IC 250 × 4.6 mm column; hexanes (solvent A); isopropanol (solvent B); isocratic 15% solvent B in 35 min; flow rate = 1.0 mL/min; detection wavelength = 254 nm.

### (1) Mixed HPLC data of 7q and 7q'

| Peak No | RT (min) | Area (%) | Area     | Height (mAU) |
|---------|----------|----------|----------|--------------|
| 1       | 19.140   | 48.95    | 203.2103 | 365.79       |
| 2       | 21.363   | 51.05    | 211.9121 | 334.10       |
| Total:  |          | 100.00   | 415.1224 | 699.89       |

### (2) Crude HPLC data of reaction mixture for preparing compound 7q

| Peak No | RT (min) | Area (%) | Area      | Height (mAU) |
|---------|----------|----------|-----------|--------------|
| 1       | 19.553   | 0.40     | 5.4583    | 22.92        |
| 2       | 21.743   | 99.60    | 1367.4906 | 1778.45      |
| Total:  |          | 100.00   | 1372.9489 | 1801.37      |

### (3) Pure HPLC data of 7q

| Peak No | RT (min) | Area (%) | Area      | Height (mAU) |
|---------|----------|----------|-----------|--------------|
| 1       | 19.227   | 0.49     | 5.1248    | 11.54        |
| 2       | 21.010   | 99.51    | 1045.5387 | 1499.59      |
| Total:  |          | 100.00   | 1050.6635 | 1511.13      |

## HPLC Studies for Determining Racemization of 7t

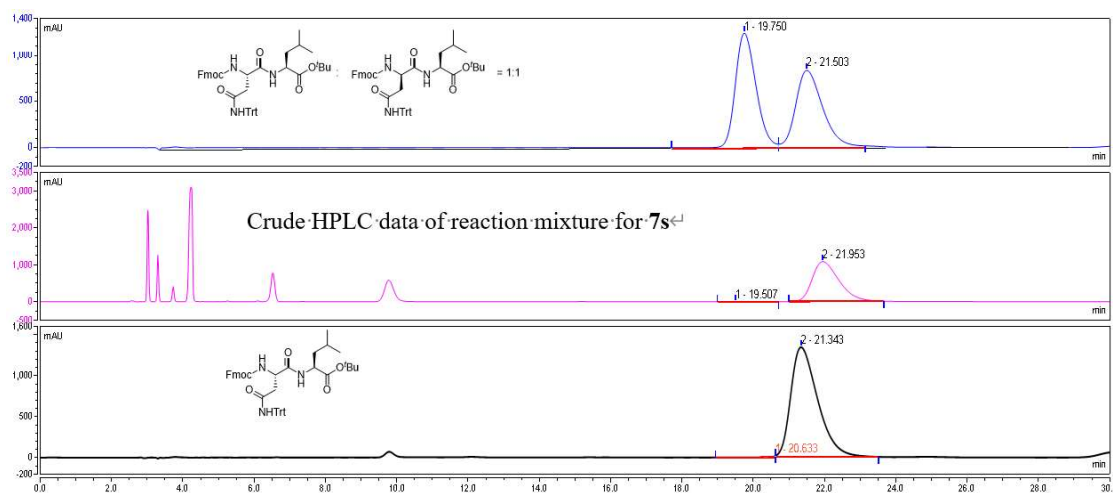

**HPLC condition:** Chiralpak®IC 250 × 4.6 mm column; hexanes (solvent A); isopropanol (solvent B); isocratic 15% solvent B in 35 min; flow rate = 1.0 mL/min; detection wavelength = 254 nm.

### (1) Mixed HPLC data of 7t and 7t'

| Peak No | RT (min) | Area (%) | Area      | Height (mAU) |
|---------|----------|----------|-----------|--------------|
| 1       | 19.750   | 53.13    | 853.7111  | 1248.72      |
| 2       | 21.503   | 46.87    | 753.2121  | 844.08       |
| Total:  |          | 100.00   | 1606.9232 | 2092.80      |

### (2) Crude HPLC data of reaction mixture for preparing compound 7t

| Peak No | RT (min) | Area (%) | Area     | Height (mAU) |
|---------|----------|----------|----------|--------------|
| 1       | 19.507   | 0.04     | 0.3512   | 0.85         |
| 2       | 21.953   | 99.96    | 937.0125 | 1078.06      |
| Total:  |          | 100.00   | 937.3637 | 1078.92      |

### (3) Pure HPLC data of 7t

| Peak No | RT (min) | Area (%) | Area      | Height (mAU) |
|---------|----------|----------|-----------|--------------|
| 1       | 20.633   | 0.02     | 0.2424    | 19.25        |
| 2       | 21.343   | 99.98    | 1172.9898 | 1341.83      |
| Total:  |          | 100.00   | 1173.2322 | 1361.08      |

## **Procedures for the synthesis of peptides on resin (SPPS)**

### **General procedure for incorporating the first amino acid on the solid support (2-CTC resin)**

2-CTC resin (39.0 mg, 0.03 mmol) with a loading of 0.77 mmol/g was placed in a 5.0 mL fritted syringe, and the resin was swollen in DCM (2 mL) for 30 min. Then the syringe was drained, and Fmoc-Gly-OH (0.09 mmol 3.0 equiv.), DIPEA (18.2 mg, 6.0 equiv.), and 2 mL of a 1:1 DMF/DCM mixture (v/v) were added to the fritted syringe. The loading reaction was left to proceed for 2 h at room temperature before the syringe was drained. Then, the resin was washed with DMF ( $4 \times 2$  mL) and DCM ( $4 \times 2$  mL).

### **General procedure for incorporating the first amino acid on the solid support (MBHA resin)**

MBHA resin (0.03 mmol) with a loading of 0.79 mmol/g was placed in a 5.0 mL fritted syringe. The resin was successively swollen in DCM (2 mL) for 30 min, then drained and treated with a solution (2 mL) of piperidine: DMF (20:80, v/v, 20% piperidine in DMF) for 5 min before being drained. The solution was added again for 15 min, then drained and the resin was washed with DMF ( $4 \times 2$  mL) and DCM ( $4 \times 2$  mL). A 5 mL tube was charged with Fmoc-Xaa-OH (0.09 mmol), TFPN (0.09 mmol), DIPEA (0.11 mmol), and DMF (1 mL). The reaction solution was reacted at room temperature for 10 min. Then this solution was added to the fritted syringe. The loading reaction was left to proceed until the resin gave a negative color test. Then, the resin was washed with DMF ( $4 \times 2.0$  mL) and DCM ( $4 \times 2.0$  mL) before being drained.

### **General procedure for removing Fmoc-protection group**

The solution of 20% piperidine in DMF (1 mL) was added to the fritted syringe to react for 5 min before being drained. A further 1 mL of 20% piperidine was added to react for 15 min. Then, the resin was again carefully washed with DMF ( $4 \times 2$  mL) and DCM ( $4 \times 2$  mL) before being drained.

### **General procedure for peptide elongation**

A 5 mL tube was charged with Fmoc-Xaa-OH (0.09 mmol), TFPN (0.09 mmol), DIPEA (0.11 mmol), and DMF (1 mL). The reaction solution was reacted at room temperature for 10 min. Then this solution was added to the fritted syringe. The loading reaction was left to proceed until the resin gave a negative color test. Then, the resin was washed with DMF ( $4 \times 2.0$  mL) and DCM ( $4 \times 2.0$  mL) before being drained.

### **General procedure of resin cleavage**

The resin was washed with DCM ( $4 \times 2$  mL) and diethyl ether ( $4 \times 2$  mL) immediately after synthesis was completed. Cleavage was then performed with 0.5 mL of a freshly prepared TFA/TIS/H<sub>2</sub>O (95:2.5:2.5) solution for 2 h. The resin was then filtered and washed with pure TFA ( $2 \times 0.5$  mL). After combining the TFA solution, TFA was removed by Nitrogen, the residue was washed by ice-cold ether ( $4 \times 5$  mL) and dissolved in MeCN/H<sub>2</sub>O (1:1, 3 mL). This solution was analyzed by analytical RP-HPLC subsequently.



**NH<sub>2</sub>-Ala-Ala-Val-Gly-Phe-OH (12):** HRMS m/z (ESI) calcd for C<sub>22</sub>H<sub>34</sub>N<sub>5</sub>O<sub>6</sub><sup>+</sup>  
[M+H]<sup>+</sup>: 464.2504, found: 464.2501.

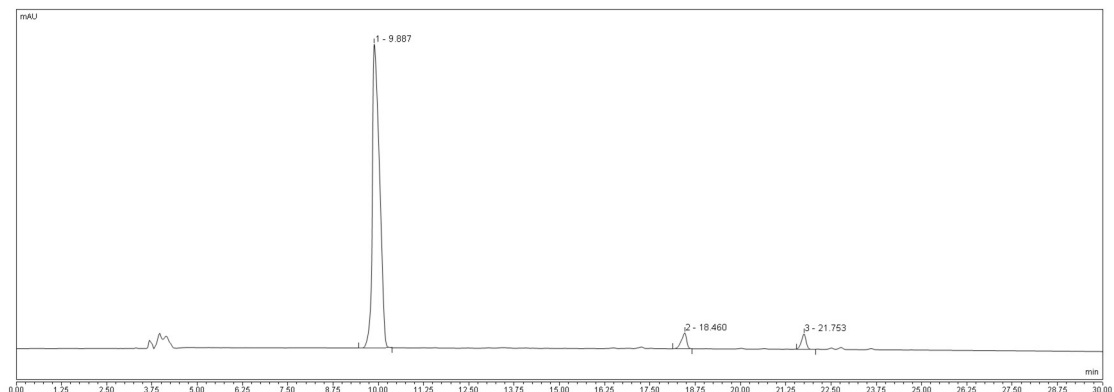

HPLC condition: Jupiter 5 $\mu$ m C18 4.6  $\times$  250 mm<sup>2</sup> column; 0.05% TFA (v/v) in H<sub>2</sub>O (solvent A), 0.05% TFA (v/v) in MeCN (solvent B); gradient 10%-100% (solvent B) in 30 min; flow rate = 1.0 mL/min; detection wavelength = 214 nm.

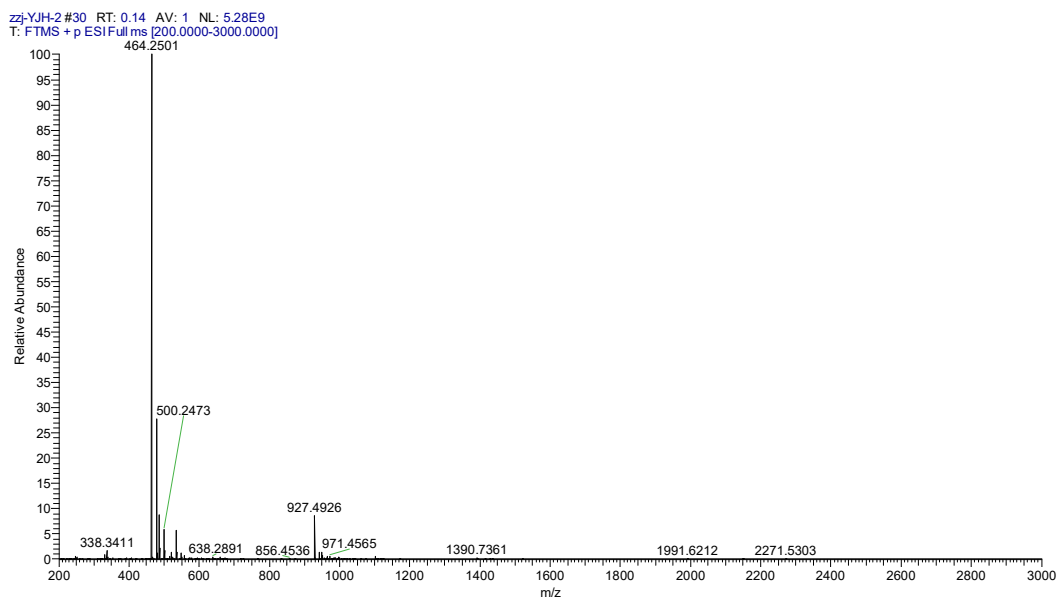

| Peak No | RT (min) | Area (%) | Area     |
|---------|----------|----------|----------|
| 1       | 9.887    | 93.50    | 452.9561 |
| 2       | 18.460   | 3.55     | 17.1751  |
| 3       | 21.753   | 2.95     | 14.3003  |
| Total   |          | 100.00   | 484.4316 |

**NH<sub>2</sub>-Tyr-Ala-Gly-Phe-Leu-OH (13):** HRMS m/z (ESI) calcd for C<sub>29</sub>H<sub>40</sub>N<sub>5</sub>O<sub>7</sub><sup>+</sup>  
[M+H]<sup>+</sup>: 570.2922, found: 570.2916.

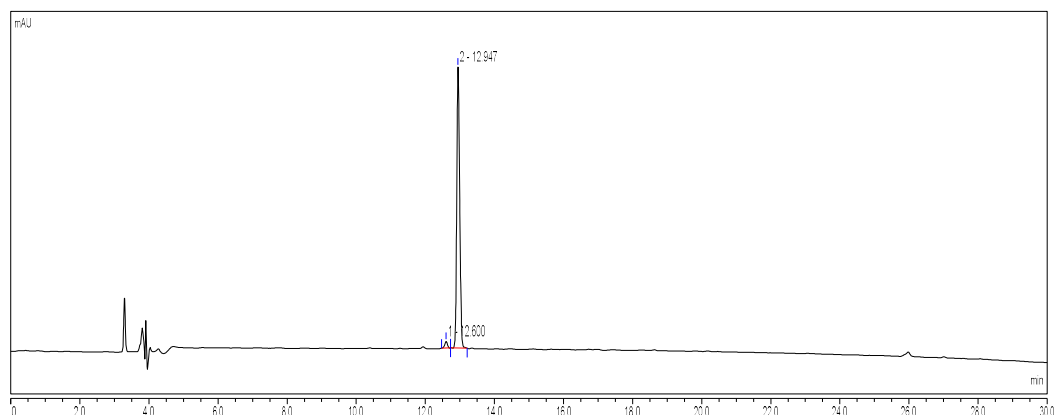

HPLC condition: Jupiter 5 $\mu$ m C18 4.6  $\times$  250 mm<sup>2</sup> column; 0.05% TFA (v/v) in H<sub>2</sub>O (solvent A), 0.05% TFA (v/v) in MeCN (solvent B); gradient 10%-100% (solvent B) in 30 min; flow rate = 1.0 mL/min; detection wavelength = 214 nm.

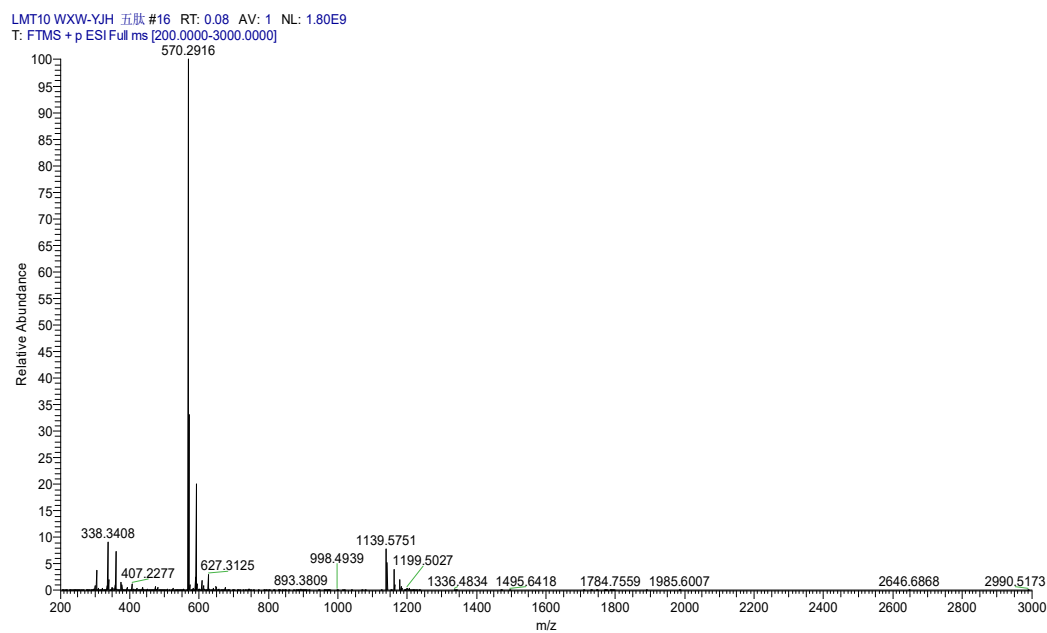

| Peak No | RT (min) | Area (%) | Area    |
|---------|----------|----------|---------|
| 1       | 12.600   | 1.97     | 0.6548  |
| 2       | 12.947   | 98.03    | 32.5899 |
| Total   |          | 100.00   | 33.2447 |

**NH<sub>2</sub>-Tyr-Aib-Aib-Phe-Leu-NH<sub>2</sub> (14):** HRMS m/z (ESI) calcd for C<sub>32</sub>H<sub>47</sub>N<sub>6</sub>O<sub>6</sub><sup>+</sup>  
[M+H]<sup>+</sup>: 611.3552, found: 611.3549.

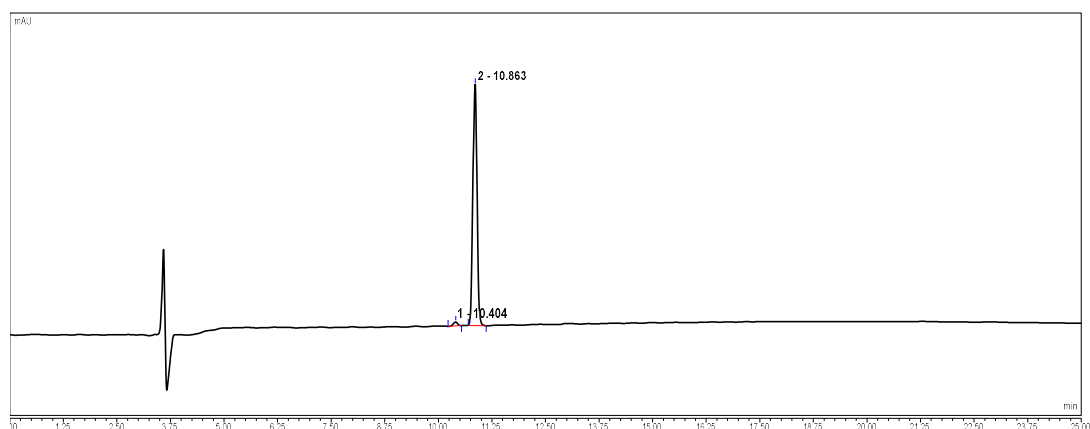

HPLC condition: Jupiter 5 $\mu$ m C18 4.6  $\times$  250 mm<sup>2</sup> column; 0.05% TFA (v/v) in H<sub>2</sub>O (solvent A), 0.05% TFA (v/v) in MeCN (solvent B); gradient 10%-100% (solvent B) in 30 min; flow rate = 1.0 mL/min; detection wavelength = 214 nm.

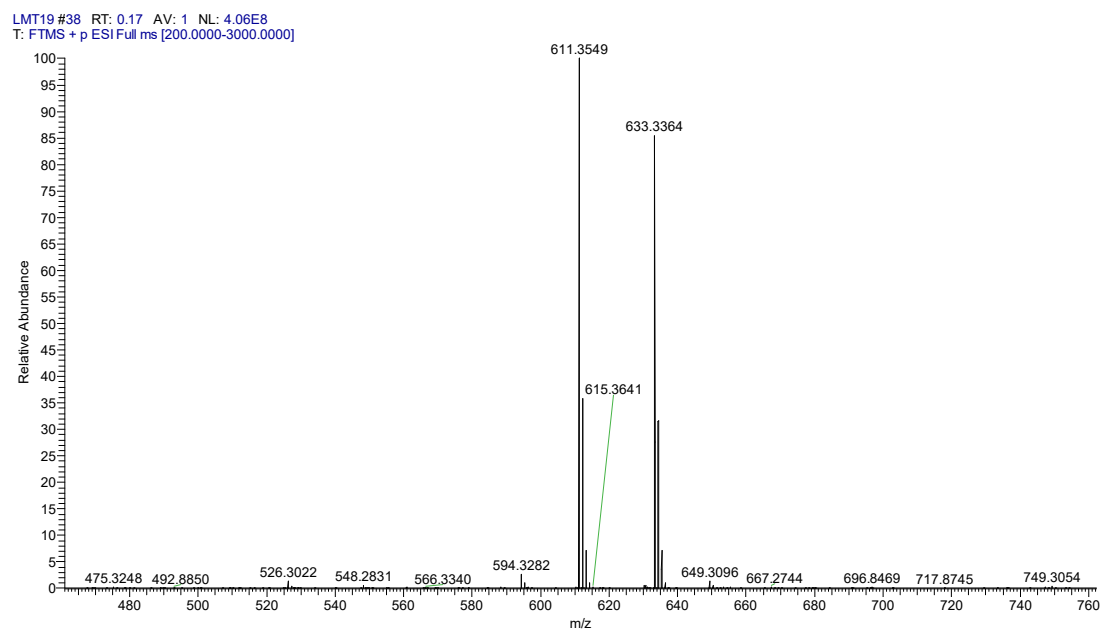

| Peak No | RT (min) | Area (%) | Area   |
|---------|----------|----------|--------|
| 1       | 10.404   | 1.55     | 0.538  |
| 2       | 10.863   | 98.45    | 34.135 |
| Total:  |          | 100.00   | 34.673 |

**NH<sub>2</sub>-Me-Ala-Tyr-Me-Ala-Gly-Phe-Leu-NH<sub>2</sub> (15):** HRMS m/z (ESI) calcd for C<sub>34</sub>H<sub>50</sub>N<sub>7</sub>O<sub>7</sub><sup>+</sup> [M+H]<sup>+</sup>: 668.3766, found: 668.3757.

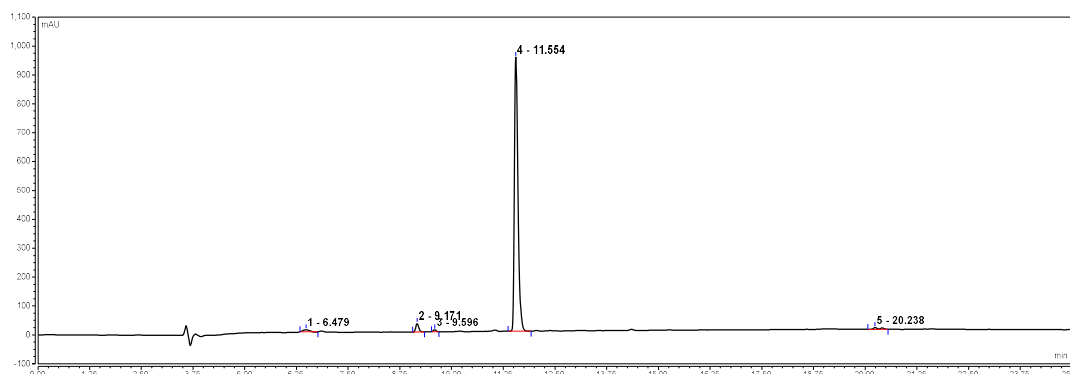

HPLC condition: Jupiter 5 $\mu$ m C18 4.6  $\times$  250 mm<sup>2</sup> column; 0.05% TFA (v/v) in H<sub>2</sub>O (solvent A), 0.05% TFA (v/v) in MeCN (solvent B); gradient 10%-100% (solvent B) in 30 min; flow rate = 1.0 mL/min; detection wavelength = 214 nm.

LMT03 #34 RT: 0.16 AV: 1 NL: 1.93E9  
T: FTMS + p ESI Full ms [200.0000-3000.0000]

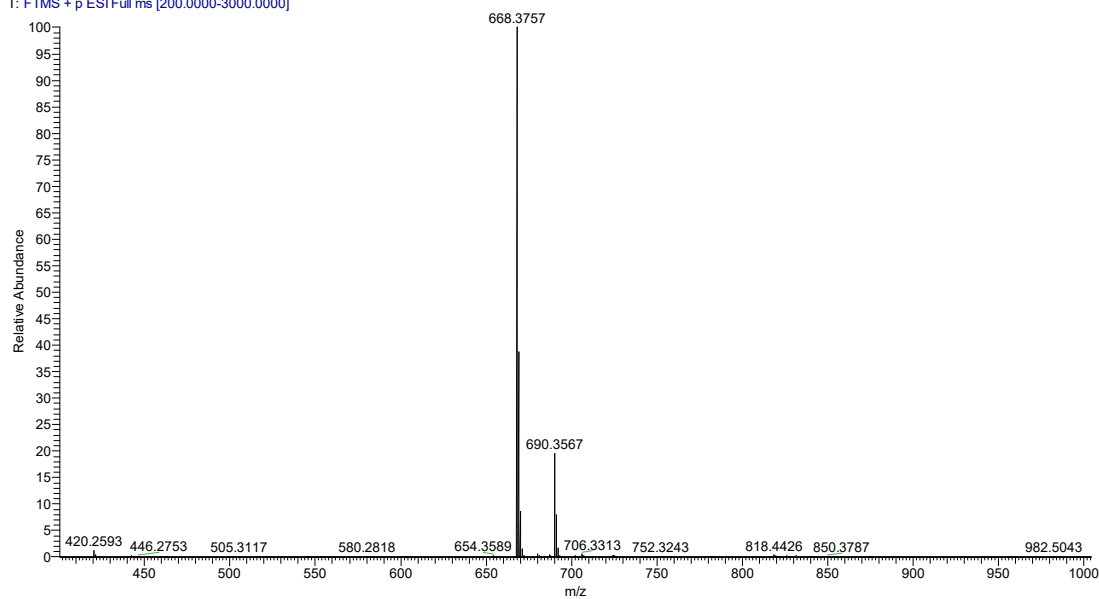

| Peak No | RT (min) | % Area | Area   |
|---------|----------|--------|--------|
| 1       | 6.479    | 1.17   | 1.172  |
| 2       | 9.171    | 2.44   | 2.438  |
| 3       | 9.596    | 0.51   | 0.506  |
| 4       | 11.554   | 94.74  | 94.550 |
| 5       | 20.238   | 1.13   | 1.129  |
| Total:  |          | 100.00 | 99.795 |

**NH<sub>2</sub>-Val-Gln-Ala-Ala-Ile-Asp-Tyr-Ile-Asn-Gly-OH (16):** HRMS m/z (ESI) calcd for C<sub>47</sub>H<sub>75</sub>N<sub>12</sub>O<sub>16</sub><sup>+</sup> [M+H]<sup>+</sup>: 1063.5419, found: 1063.5422.

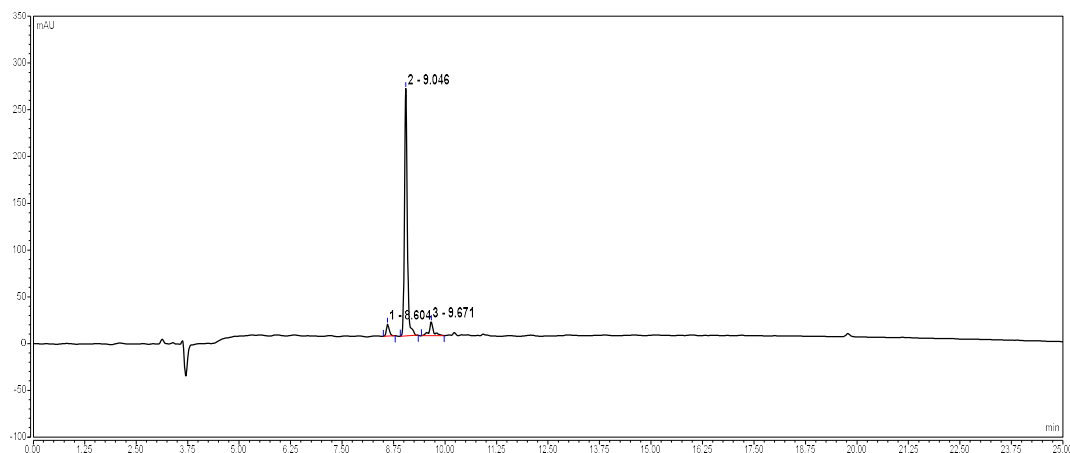

HPLC condition: Jupiter 5 $\mu$ m C18 4.6  $\times$  250 mm<sup>2</sup> column; 0.05% TFA (v/v) in H<sub>2</sub>O (solvent A), 0.05% TFA (v/v) in MeCN (solvent B); gradient 10%-100% (solvent B) in 30 min; flow rate = 1.0 mL/min; detection wavelength = 214 nm.

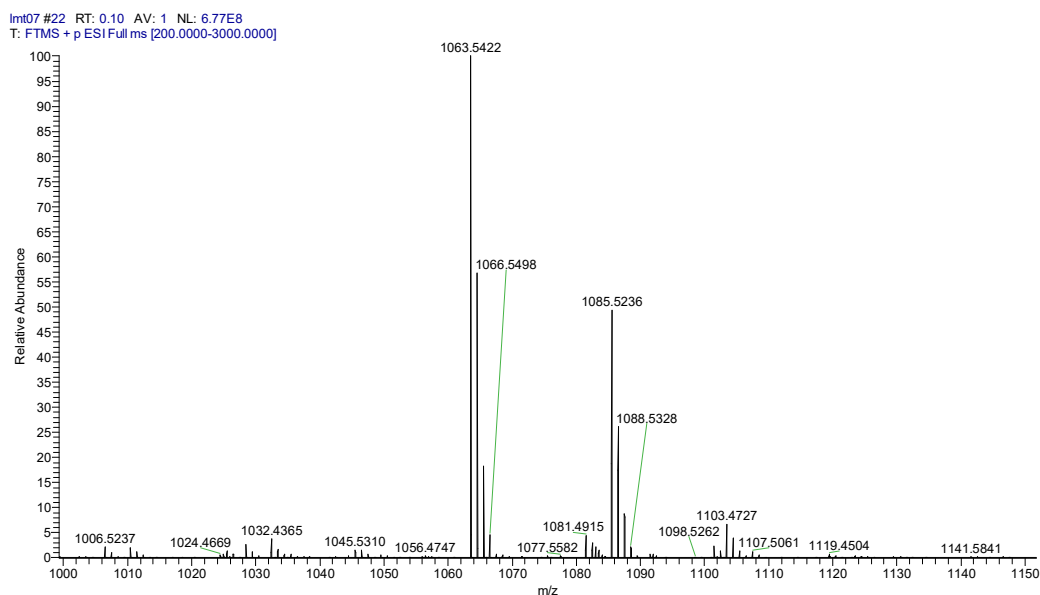

| Peak No | RT (min) | % Area | Area   |
|---------|----------|--------|--------|
| 1       | 8.604    | 4.33   | 1.040  |
| 2       | 9.046    | 88.26  | 21.226 |
| 3       | 9.671    | 7.41   | 1.782  |
| Total:  |          | 100.00 | 24.048 |

# NMR spectrum

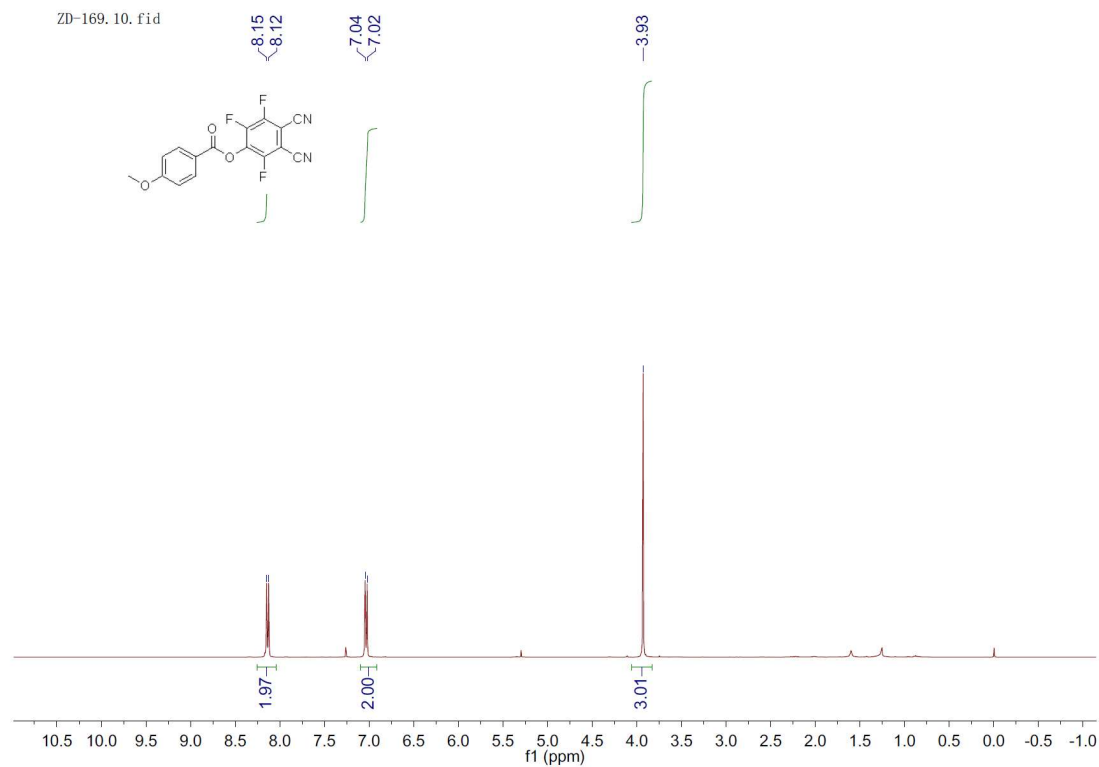

**Figure S1.**  $^1\text{H}$  NMR of compound **3a** in  $\text{DMSO-}d_6$ , 400 MHz for  $^1\text{H}$  NMR.

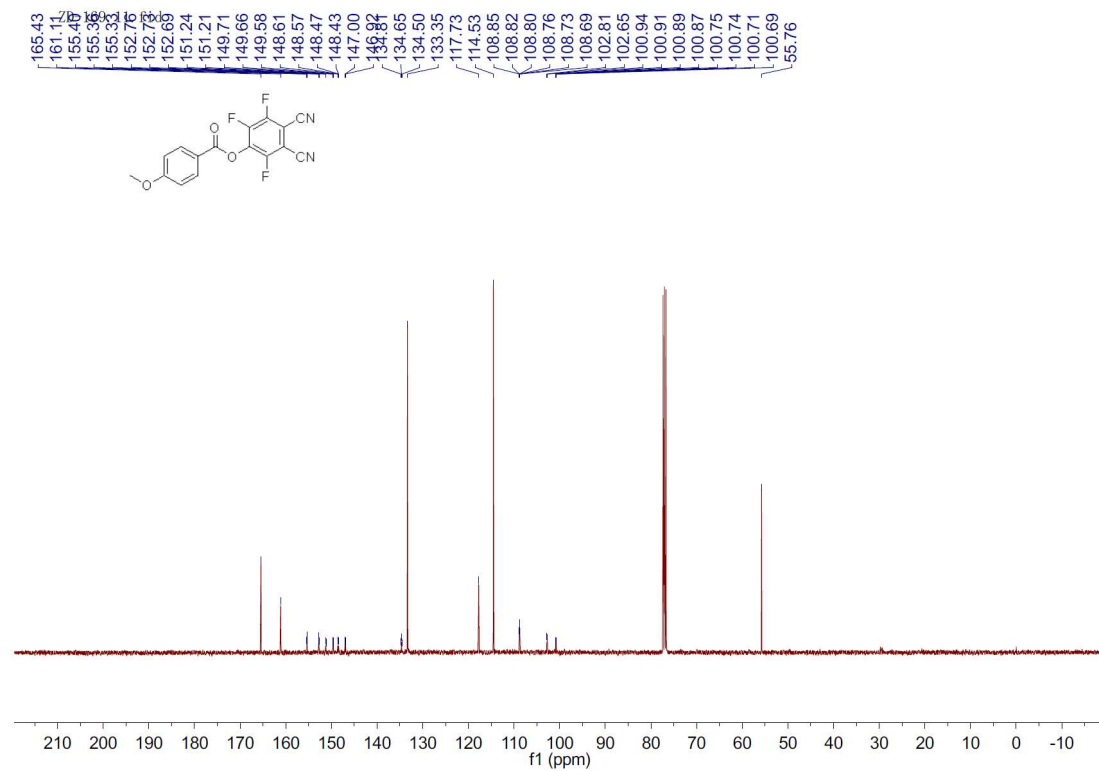

**Figure S2.**  $^{13}\text{C}$  NMR of compound **3a** in  $\text{DMSO-}d_6$ , 100 MHz for  $^{13}\text{C}$  NMR.

ZD-169.12.fid

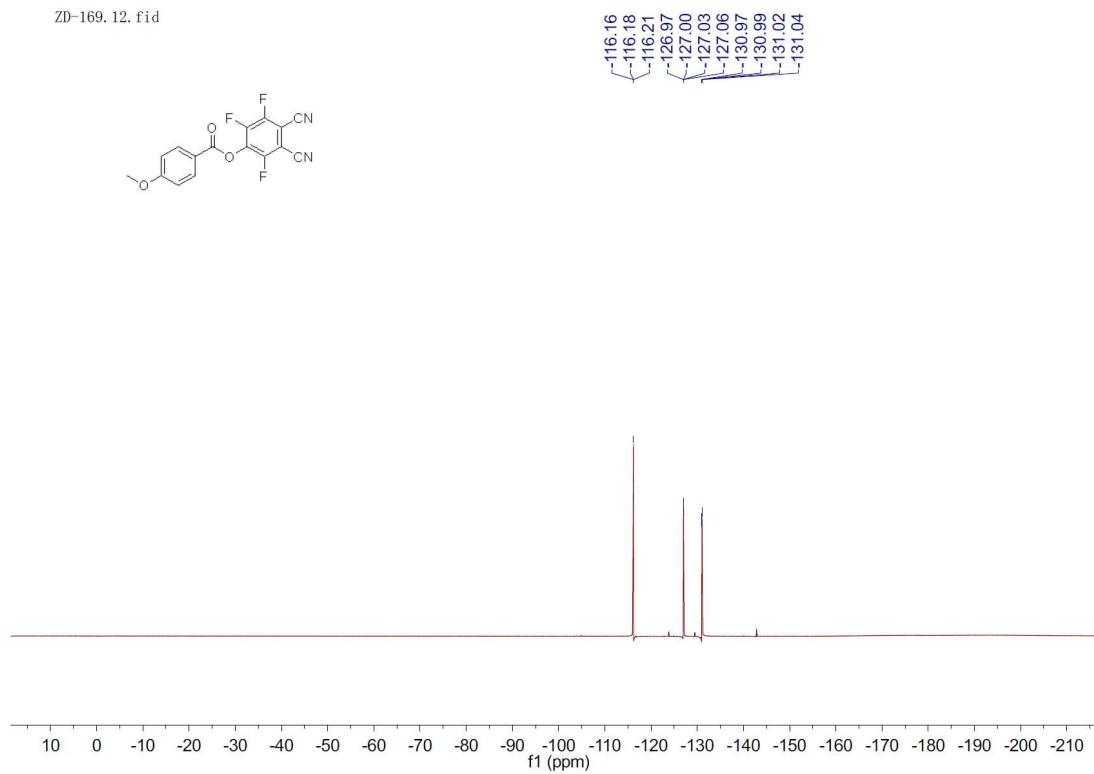

**Figure S3.** <sup>13</sup>F NMR of compound **3a** in DMSO-*d*<sub>6</sub>, 376 MHz for <sup>13</sup>F NMR.

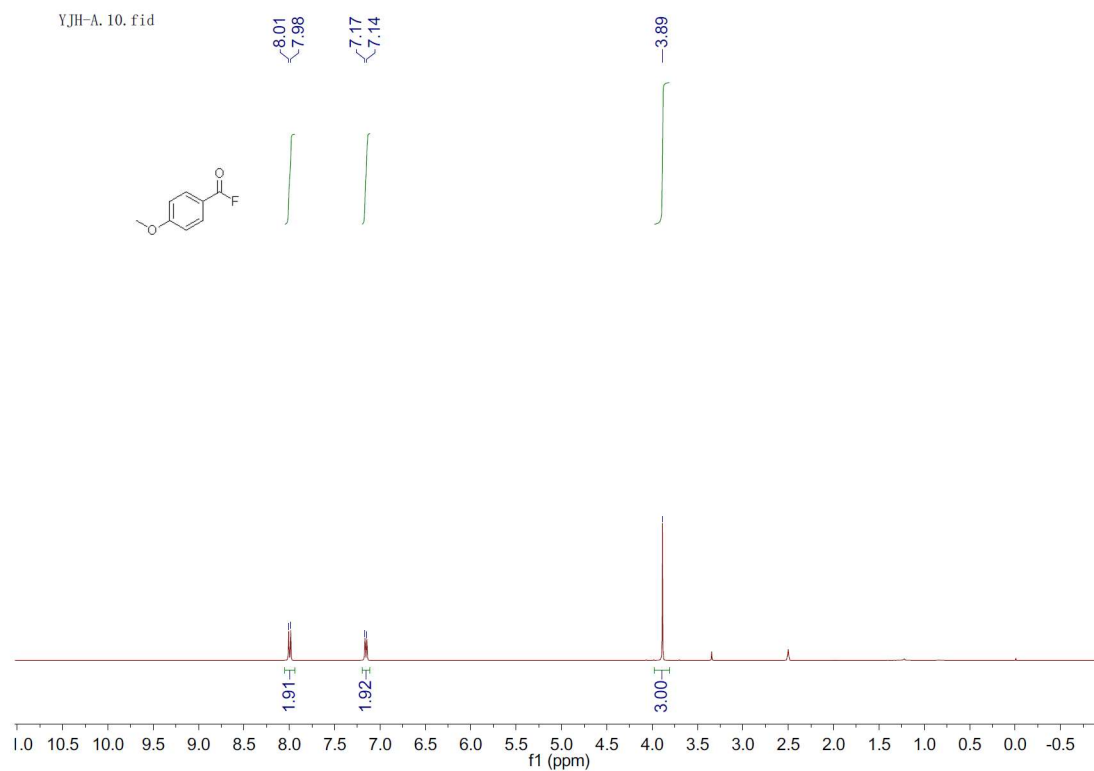

**Figure S4.**  $^1\text{H}$  NMR of compound **4a** in  $\text{DMSO-}d_6$ , 400 MHz for  $^1\text{H}$  NMR.

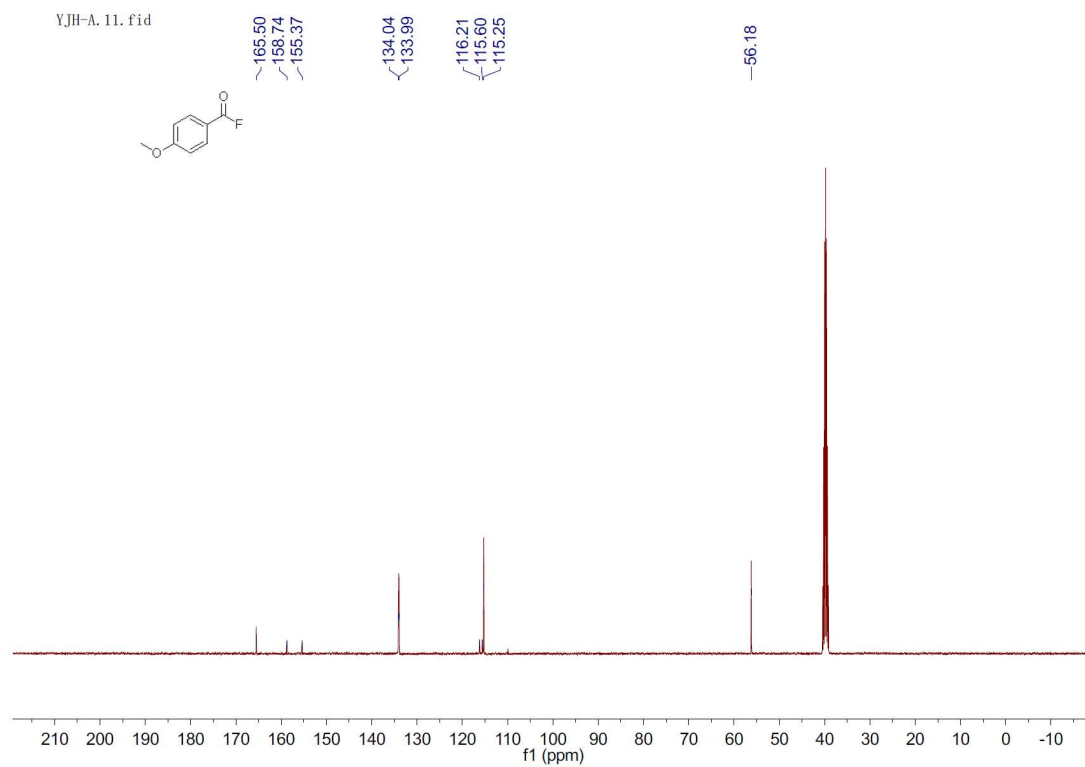

**Figure S5.**  $^{13}\text{C}$  NMR of compound **4a** in  $\text{DMSO-}d_6$ , 100 MHz for  $^{13}\text{C}$  NMR.



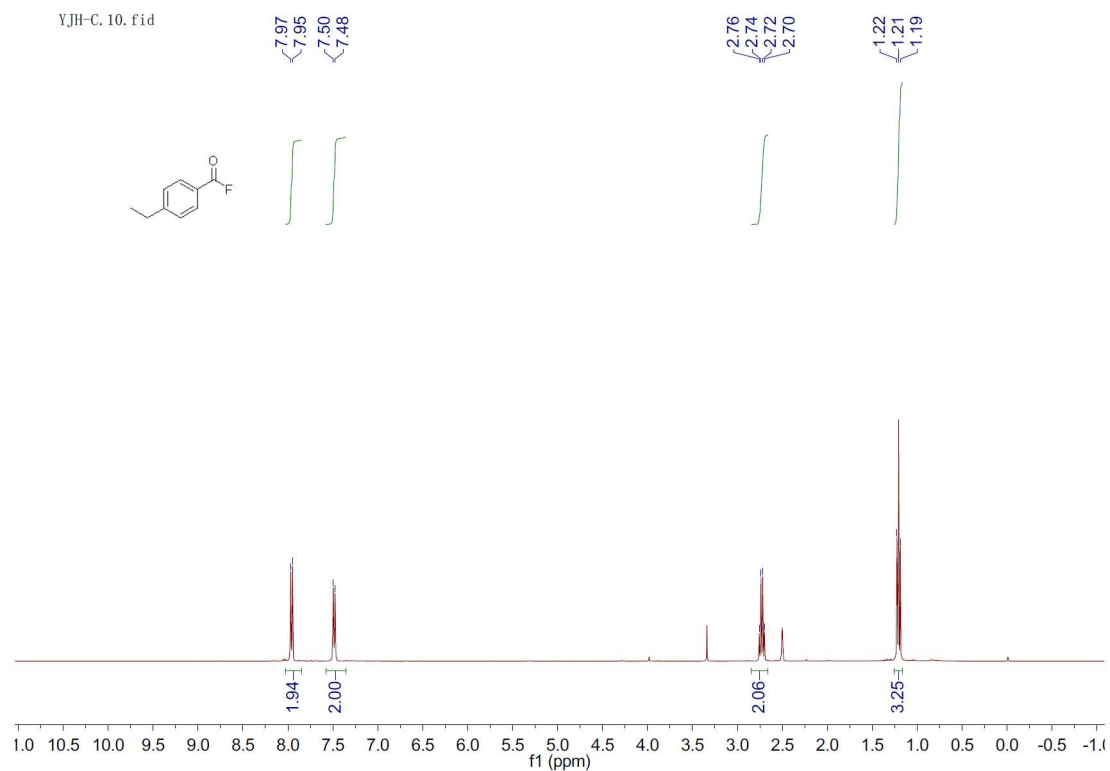

**Figure S6.**  $^1\text{H}$  NMR of compound **4b** in  $\text{DMSO-}d_6$ , 400 MHz for  $^1\text{H}$  NMR.

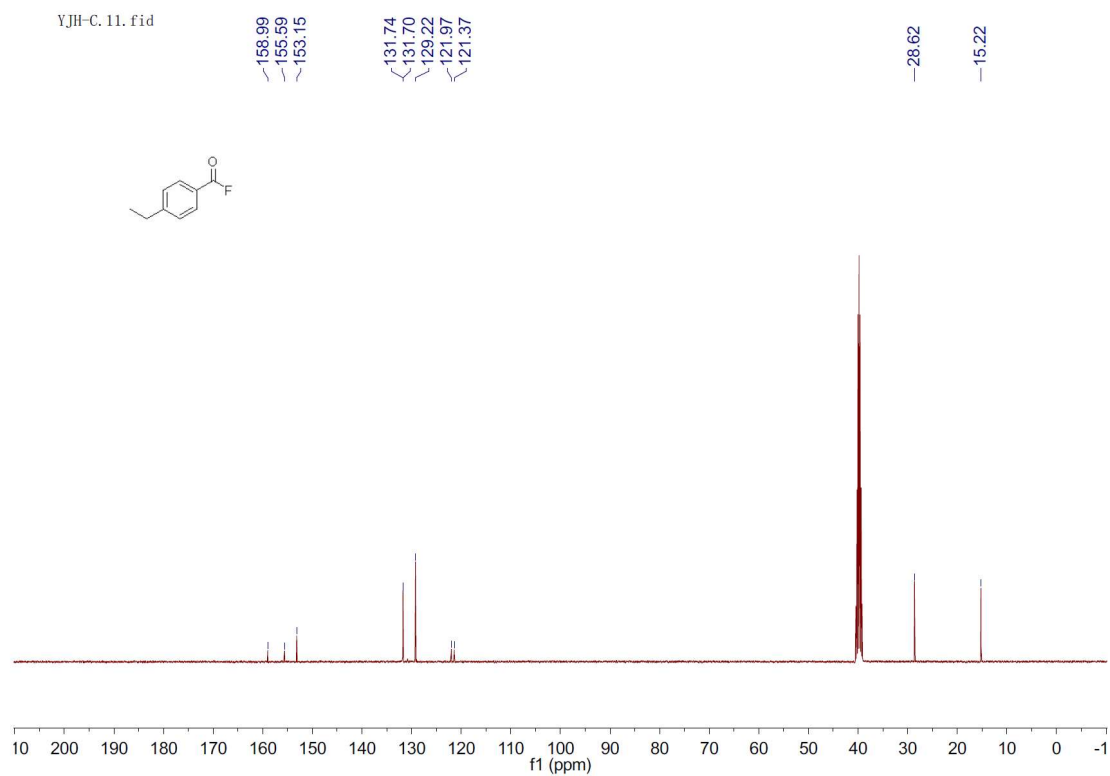

**Figure S7.**  $^{13}\text{C}$  NMR of compound **4b** in  $\text{DMSO-}d_6$ , 100 MHz for  $^{13}\text{C}$  NMR.

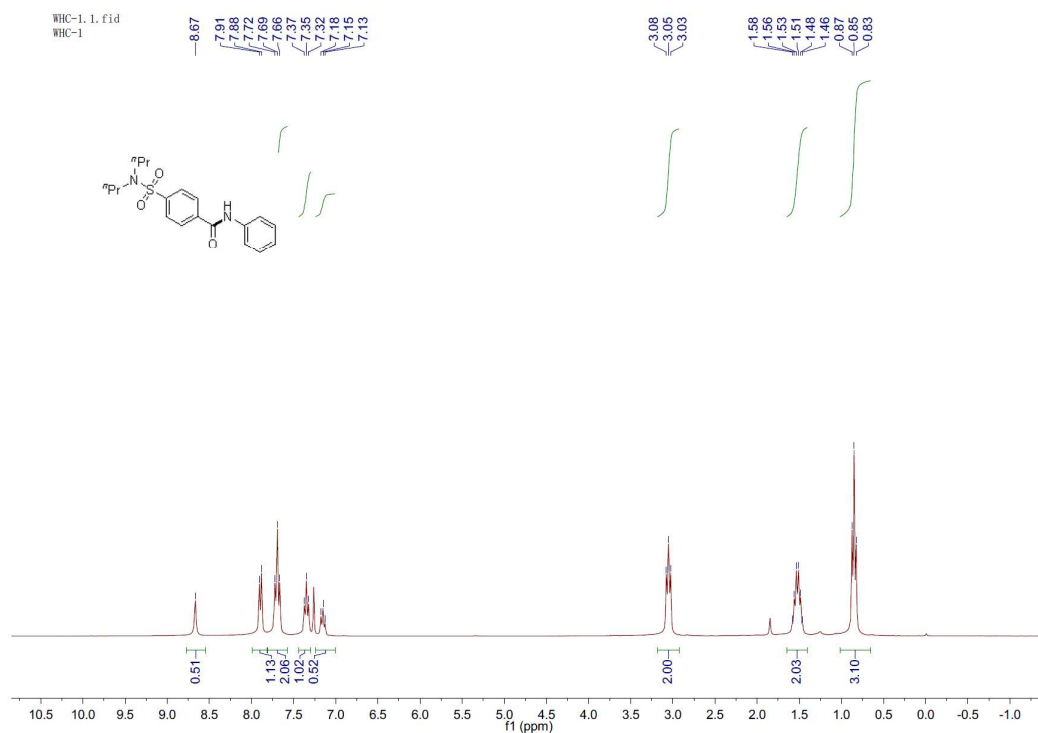

**Figure S8.**  $^1\text{H}$  NMR of compound **6a** in  $\text{CDCl}_3$ , 300 MHz for  $^1\text{H}$  NMR.

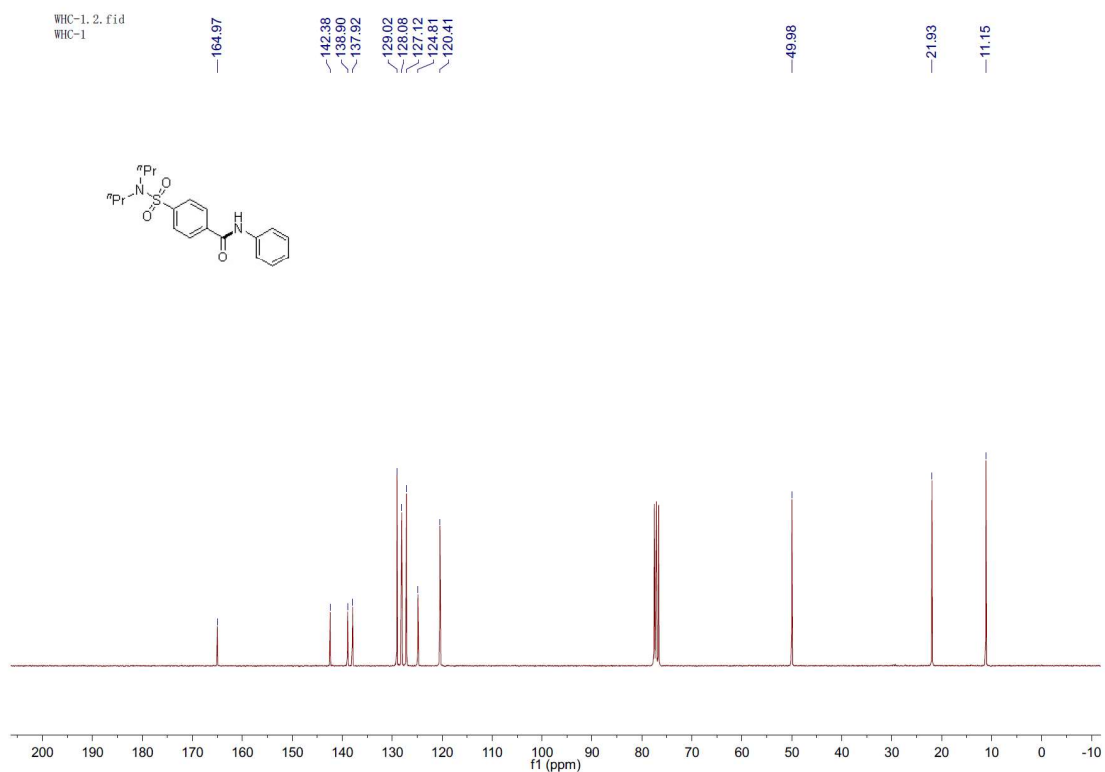

**Figure S9.**  $^{13}\text{C}$  NMR of compound **6a** in  $\text{CDCl}_3$ , 75 MHz for  $^{13}\text{C}$  NMR.

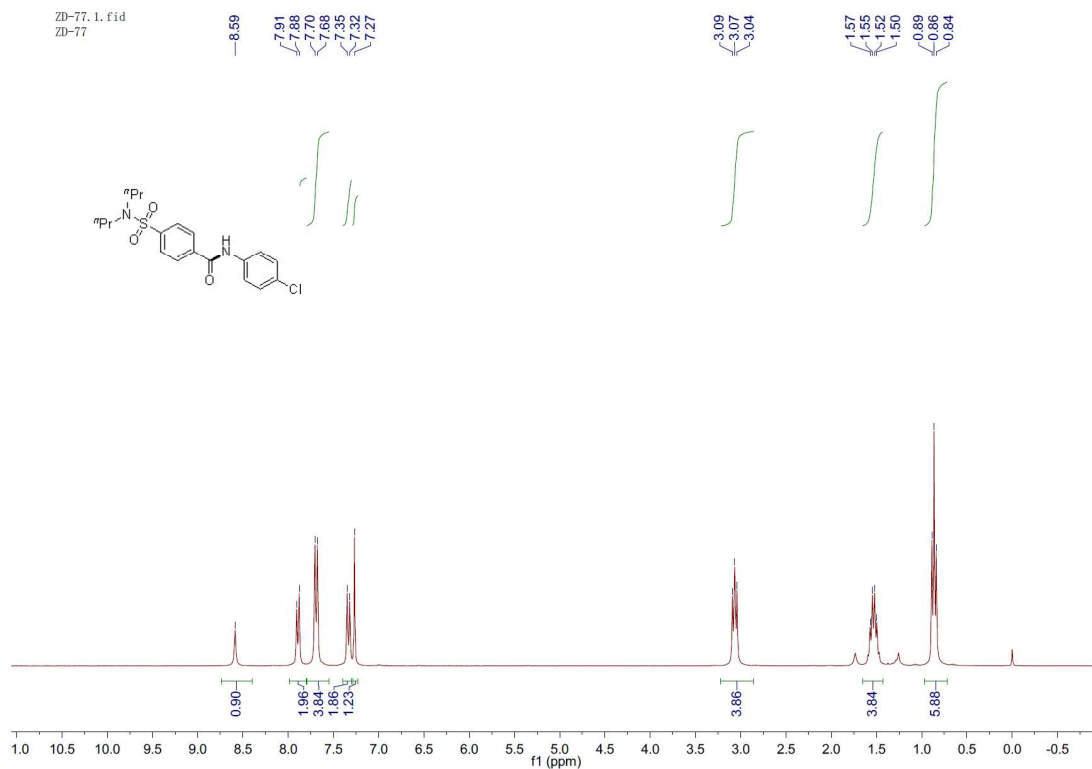

**Figure S10.**  $^1\text{H}$  NMR of compound **6b** in  $\text{CDCl}_3$ , 300 MHz for  $^1\text{H}$  NMR.

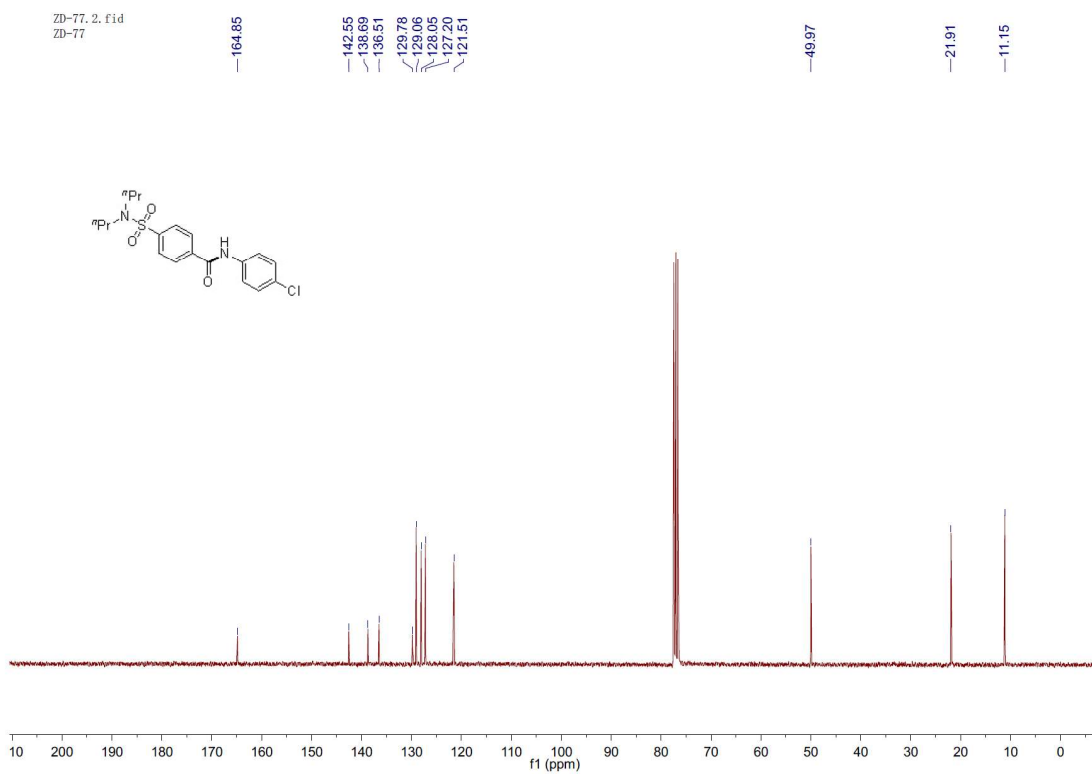

**Figure S11.**  $^{13}\text{C}$  NMR of compound **6b** in  $\text{CDCl}_3$ , 75 MHz for  $^{13}\text{C}$  NMR.

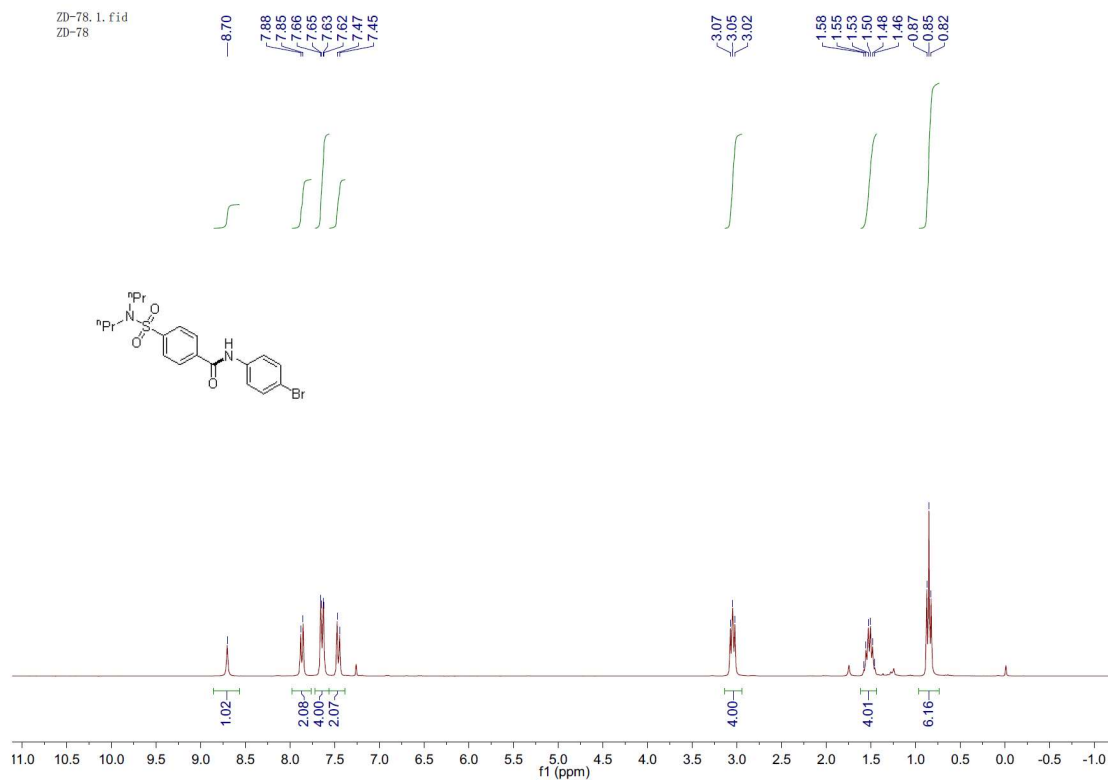

**Figure S12.**  $^1\text{H}$  NMR of compound **6c** in  $\text{CDCl}_3$ , 300 MHz for  $^1\text{H}$  NMR.

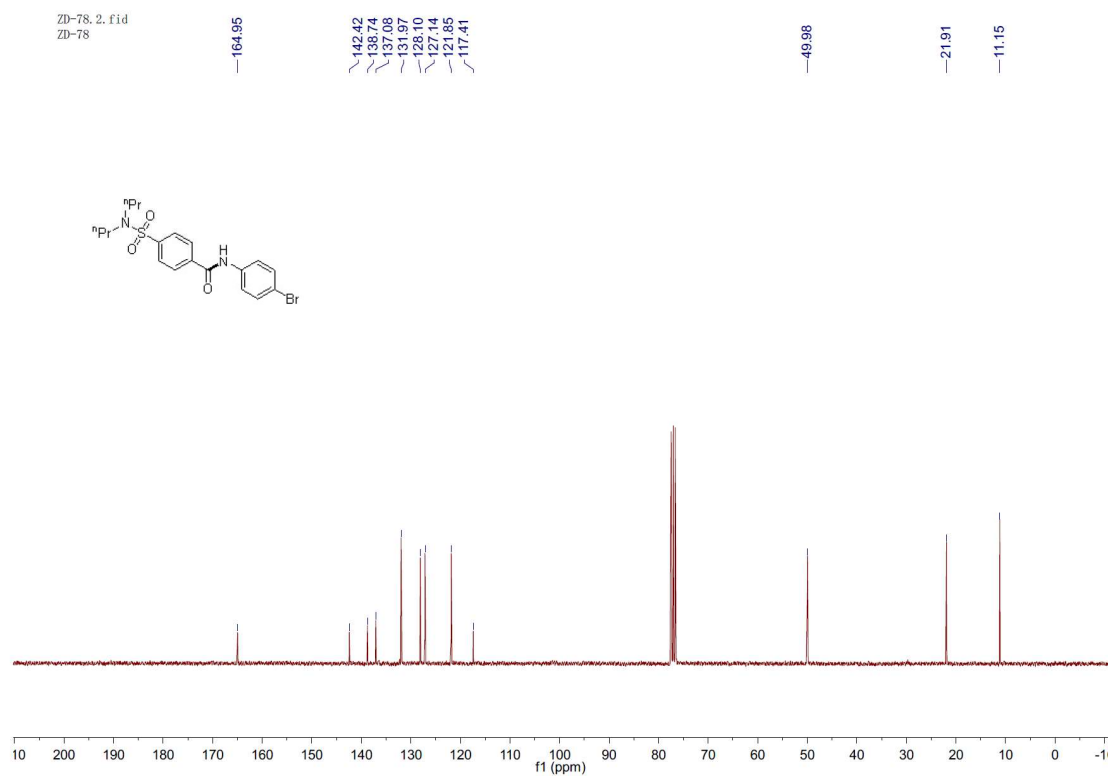

**Figure S13.**  $^{13}\text{C}$  NMR of compound **6c** in  $\text{CDCl}_3$ , 75 MHz for  $^{13}\text{C}$  NMR.

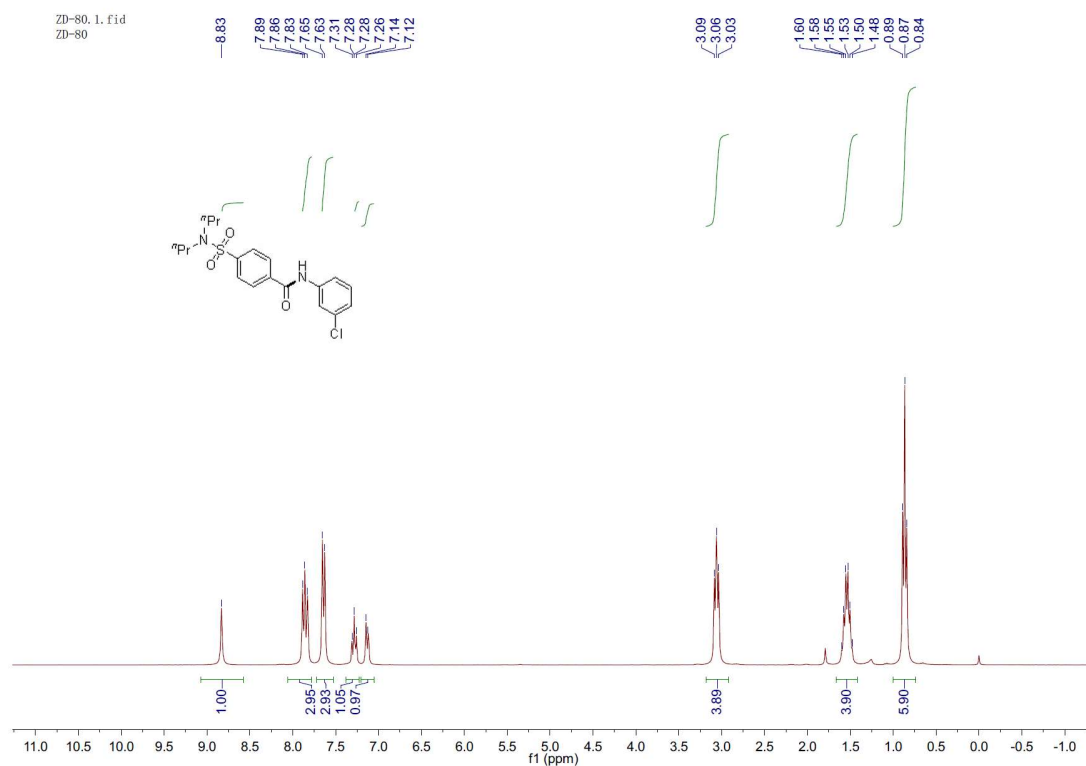

**Figure S14.**  $^1\text{H}$  NMR of compound **6d** in  $\text{CDCl}_3$ , 300 MHz for  $^1\text{H}$  NMR.

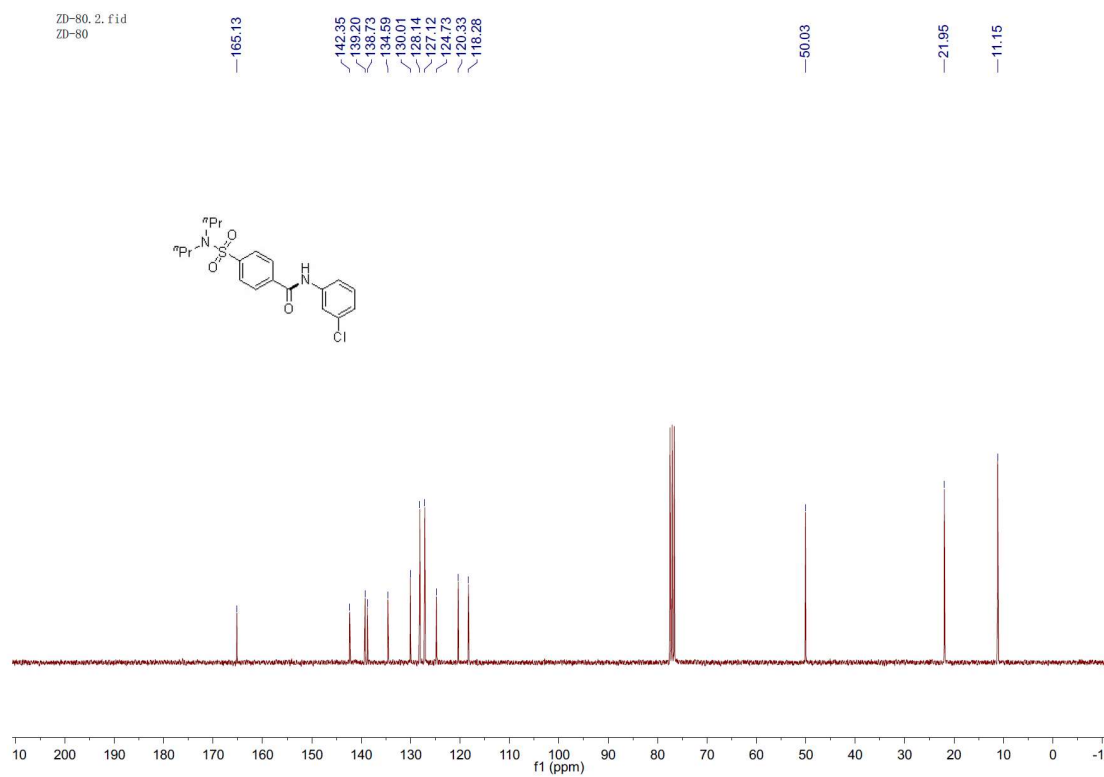

**Figure S15.**  $^{13}\text{C}$  NMR of compound **6d** in  $\text{CDCl}_3$ , 75 MHz for  $^{13}\text{C}$  NMR.

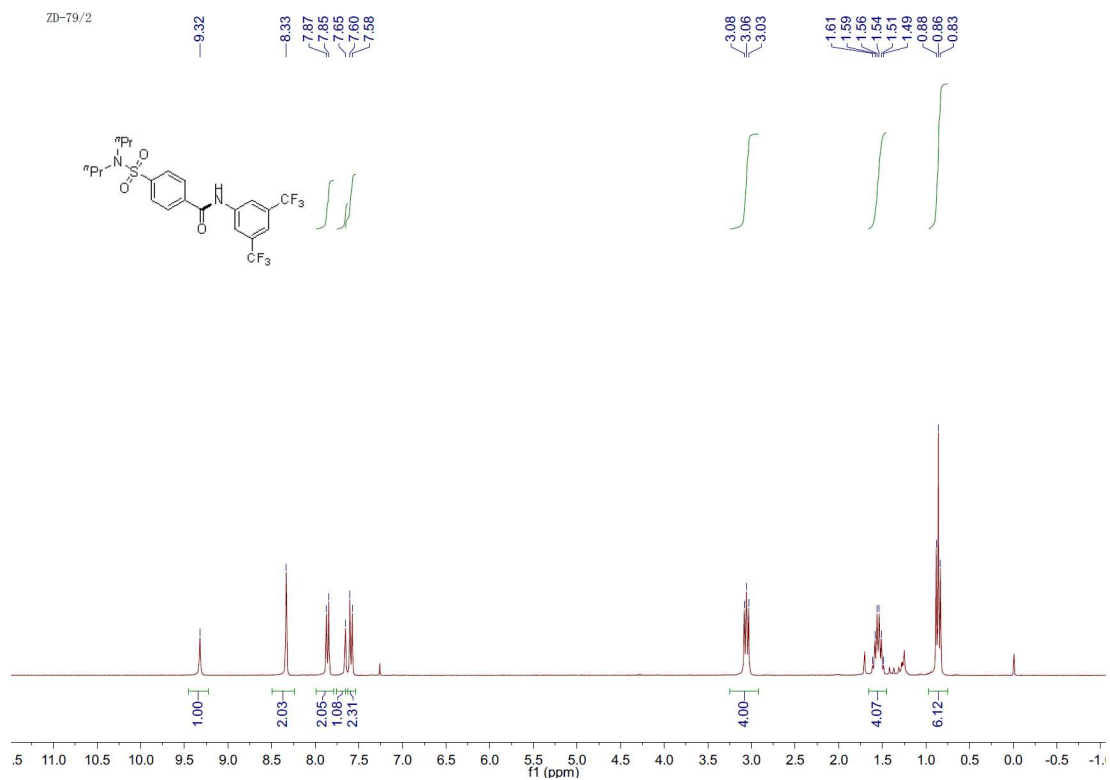

**Figure S16.** <sup>1</sup>H NMR of compound **6e** in CDCl<sub>3</sub>, 300 MHz for <sup>1</sup>H NMR.

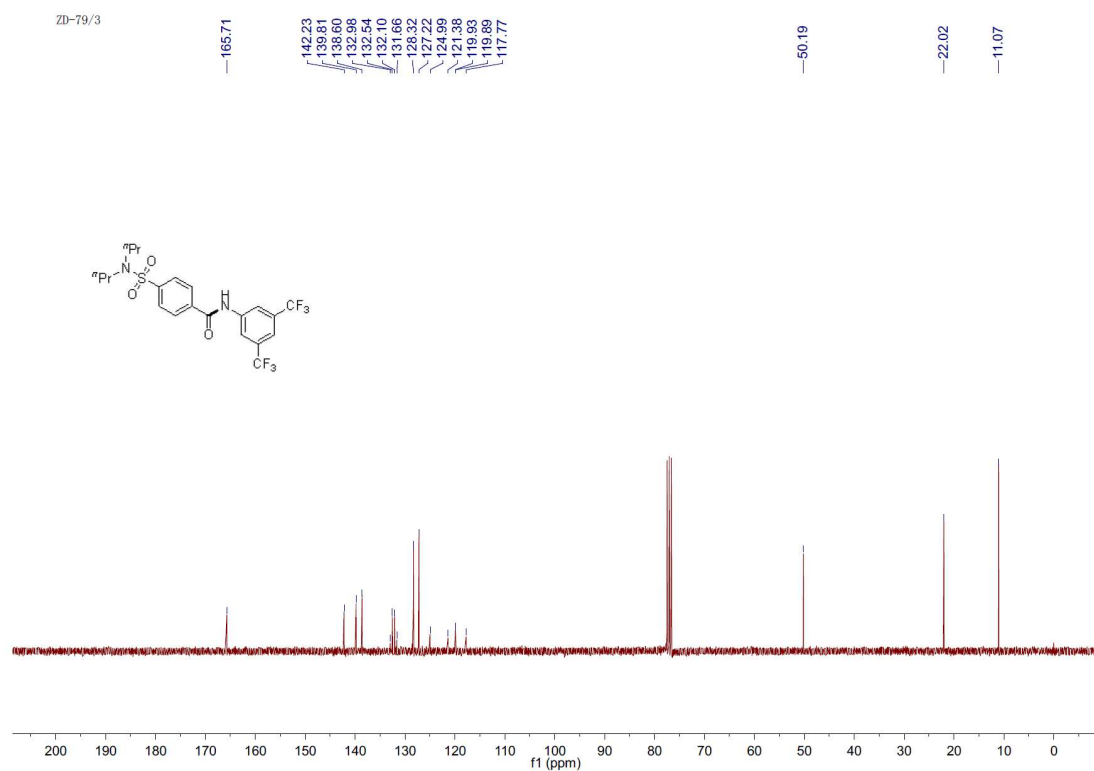

**Figure S17.** <sup>13</sup>C NMR of compound **6e** in CDCl<sub>3</sub>, 75 MHz for <sup>13</sup>C NMR.

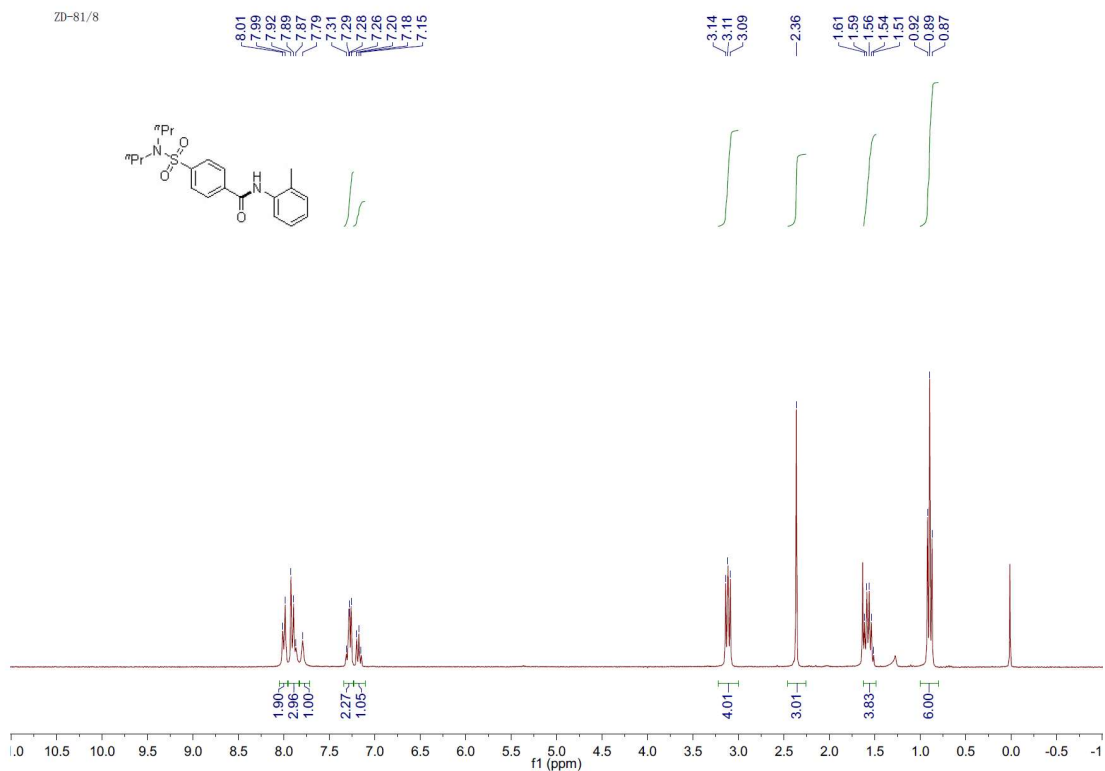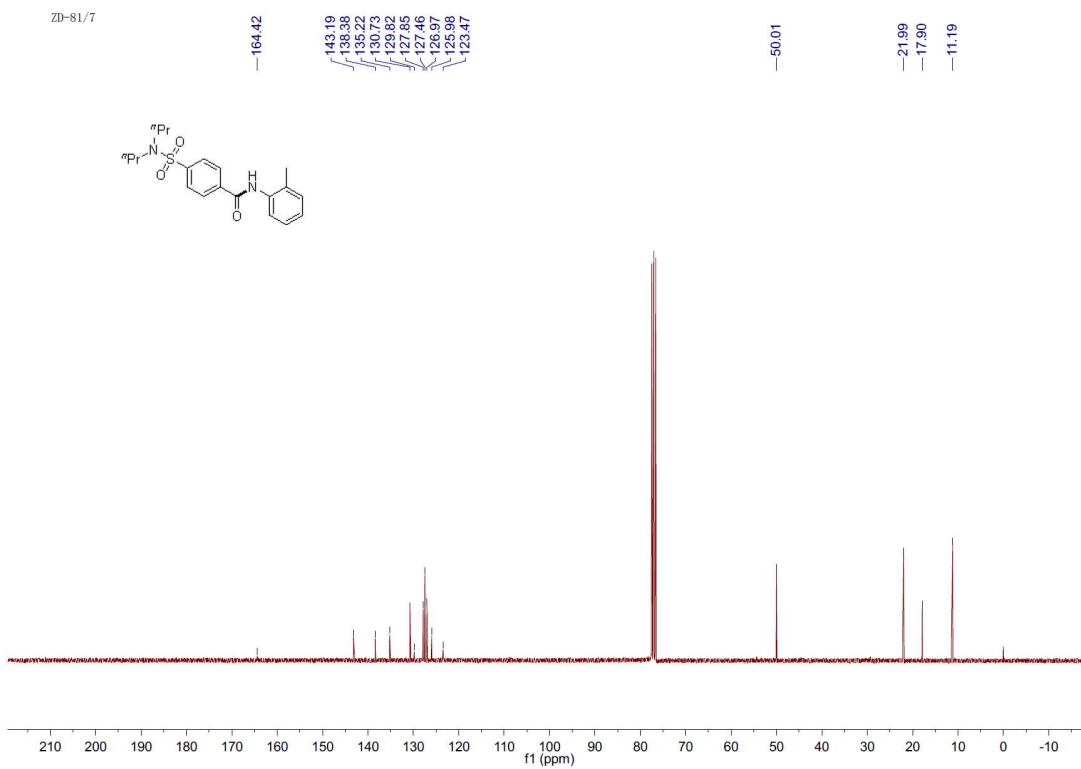

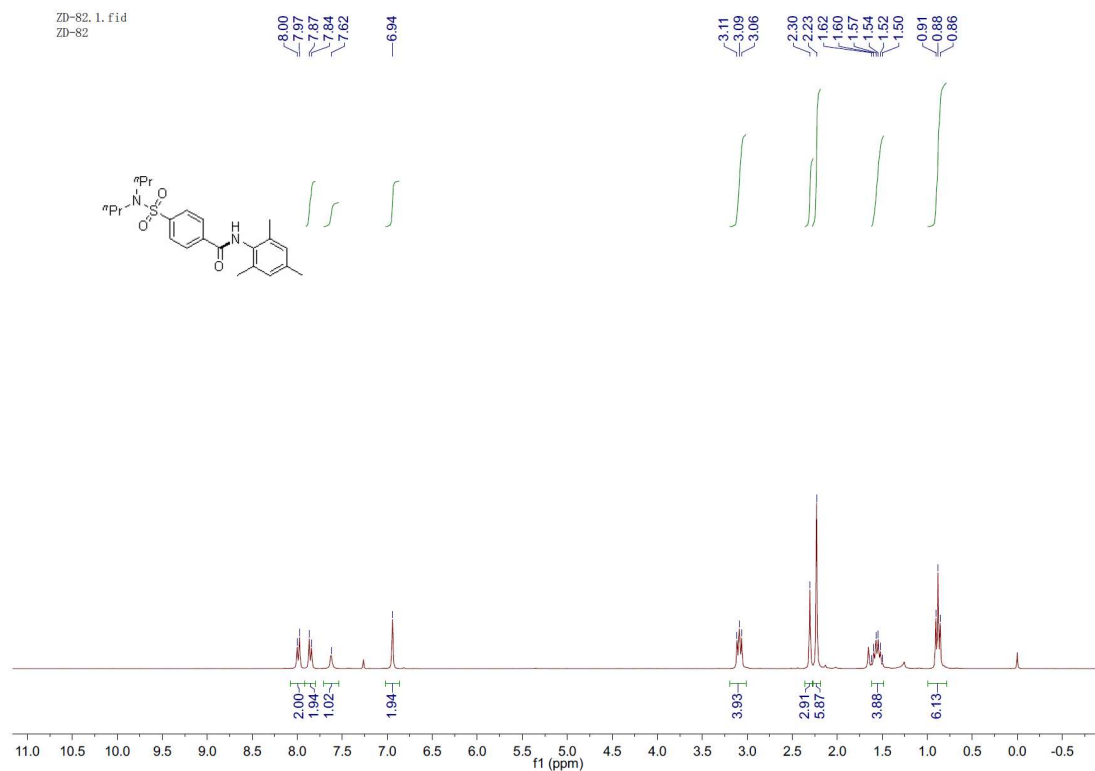

**Figure S10.**  $^1\text{H}$  NMR of compound **6g** in  $\text{CDCl}_3$ , 300 MHz for  $^1\text{H}$  NMR.

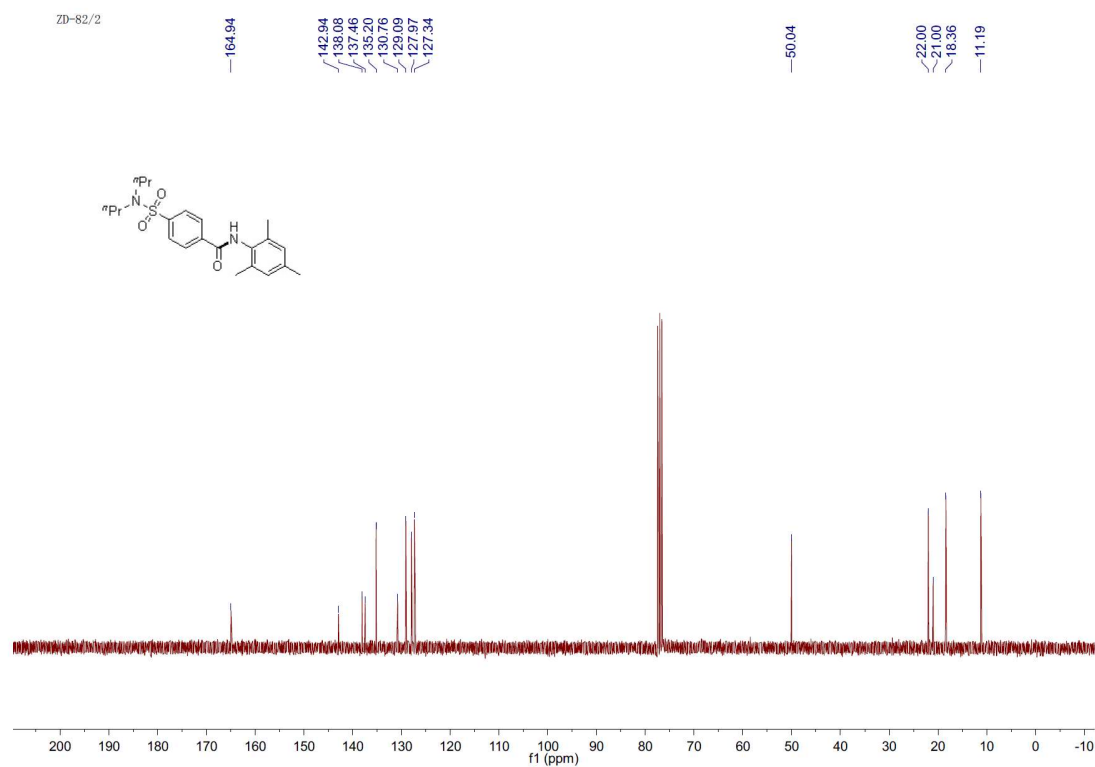

**Figure S21.**  $^{13}\text{C}$  NMR of compound **6g** in  $\text{CDCl}_3$ , 75 MHz for  $^{13}\text{C}$  NMR.



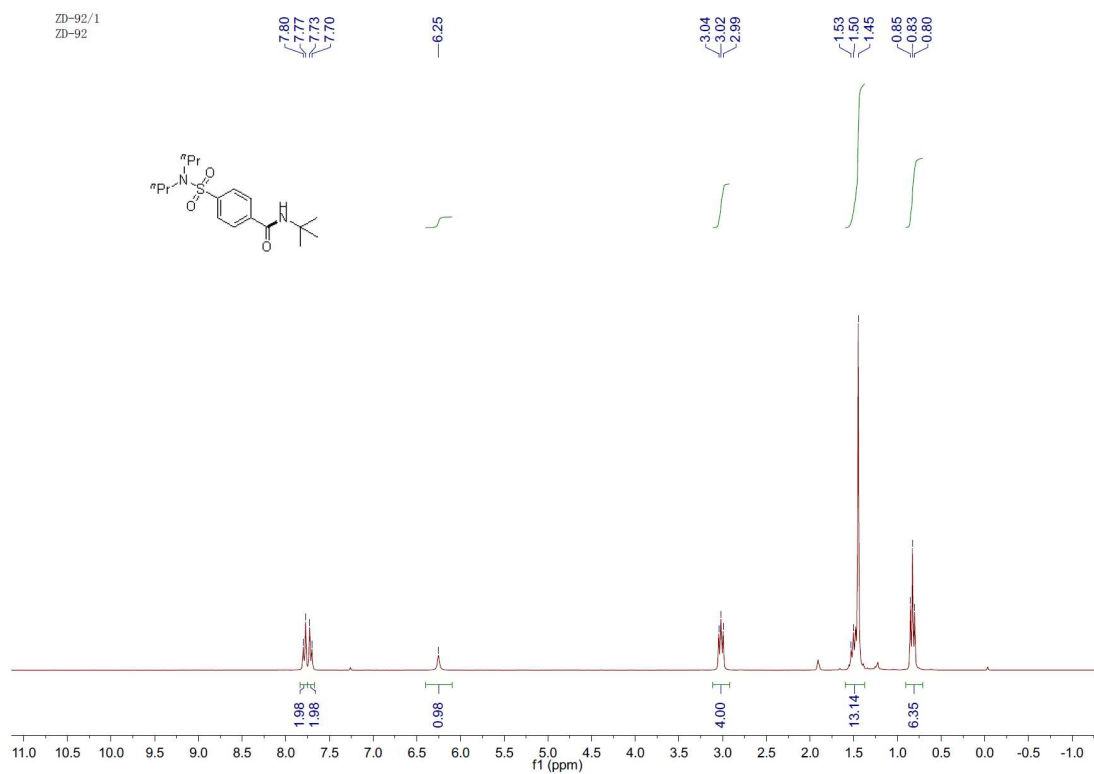

**Figure S22.**  $^1\text{H}$  NMR of compound **6h** in  $\text{CDCl}_3$ , 300 MHz for  $^1\text{H}$  NMR.

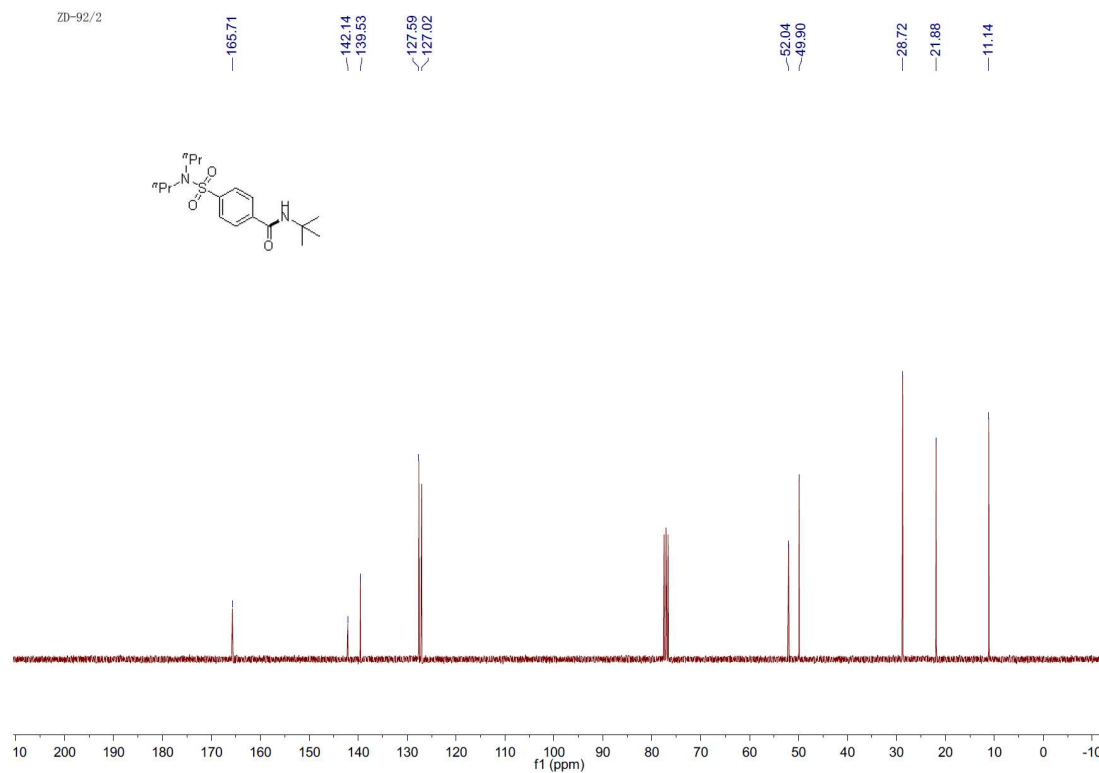

**Figure S23.**  $^{13}\text{C}$  NMR of compound **6h** in  $\text{CDCl}_3$ , 75 MHz for  $^{13}\text{C}$  NMR.

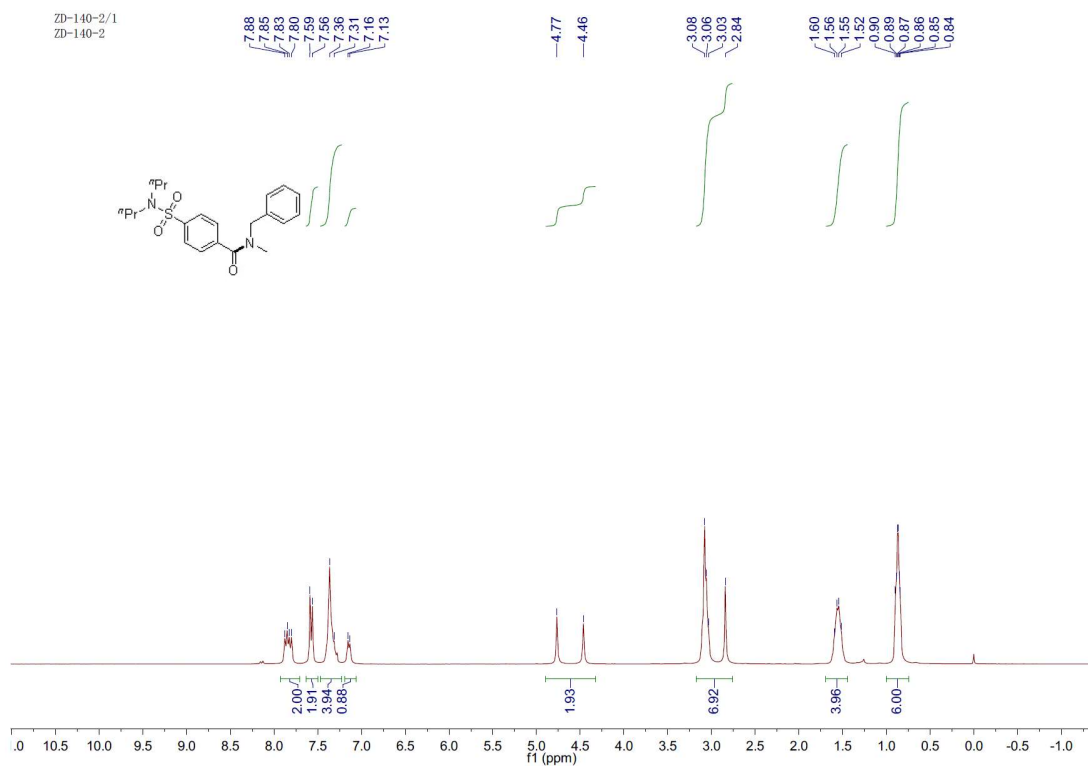

**Figure S24.** <sup>1</sup>H NMR of compound **6i** in CDCl<sub>3</sub>, 300 MHz for <sup>1</sup>H NMR.

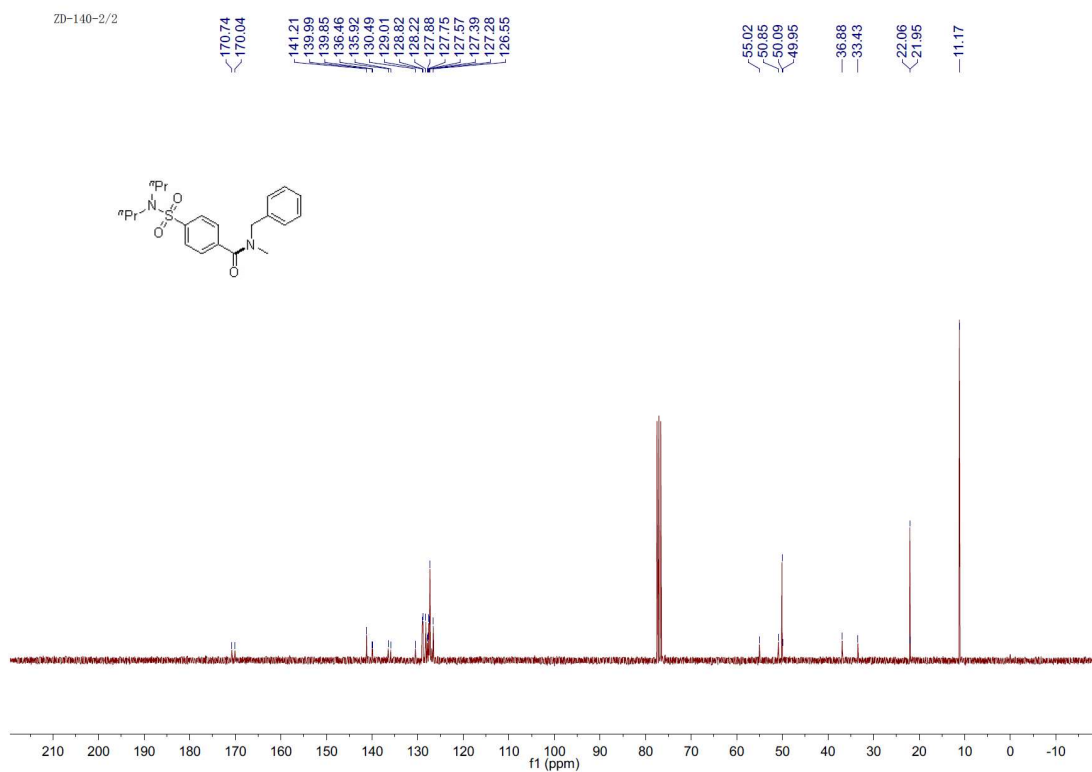

**Figure S25.** <sup>13</sup>C NMR of compound **6i** in CDCl<sub>3</sub>, 75 MHz for <sup>13</sup>C NMR.

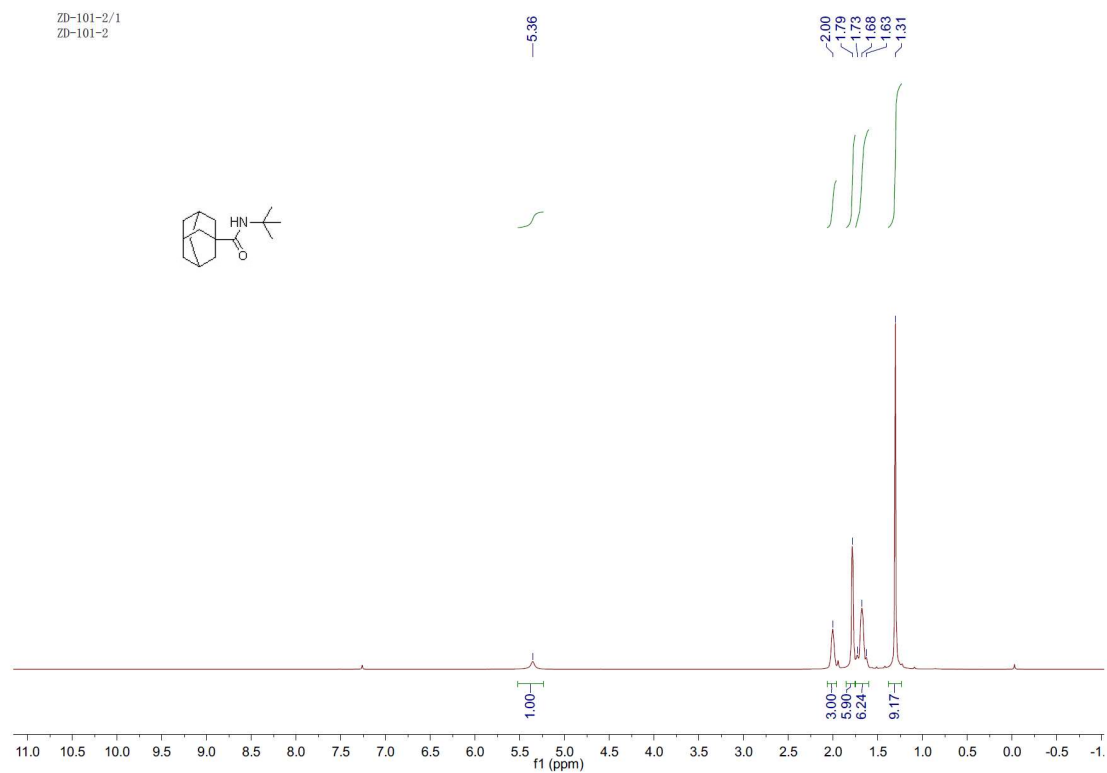

**Figure S26.**  $^1\text{H}$  NMR of compound **6j** in  $\text{CDCl}_3$ , 300 MHz for  $^1\text{H}$  NMR.

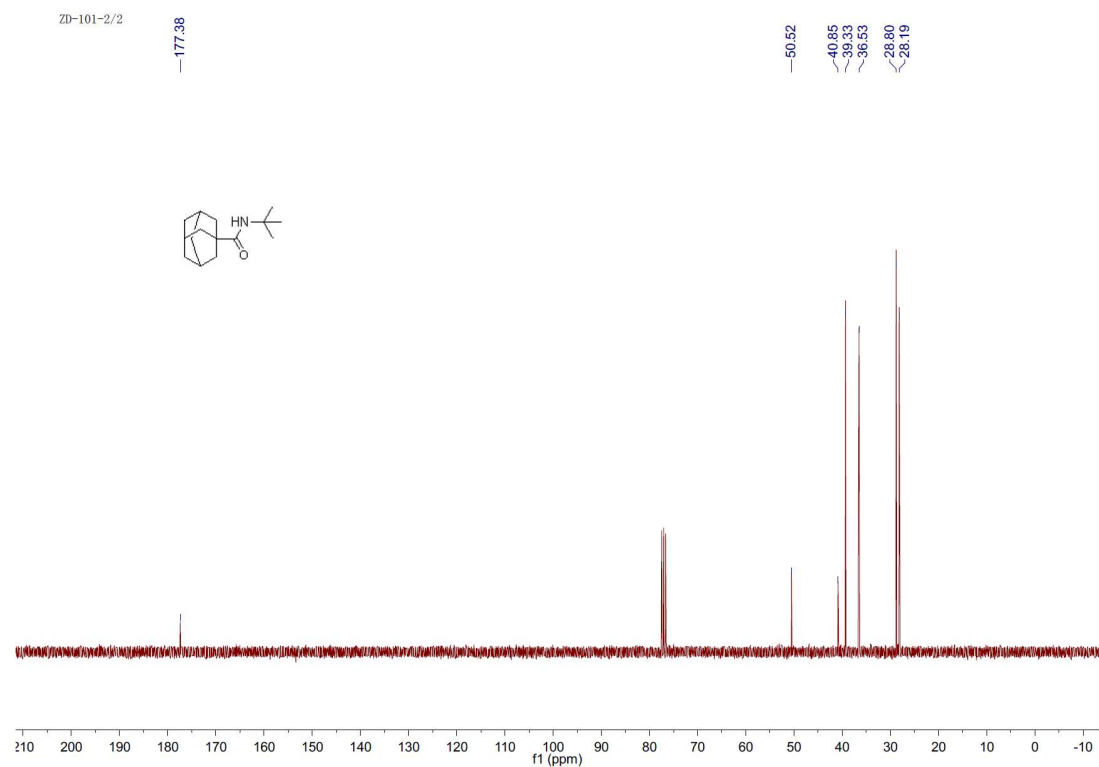

**Figure S27.**  $^{13}\text{C}$  NMR of compound **6j** in  $\text{CDCl}_3$ , 75 MHz for  $^{13}\text{C}$  NMR.

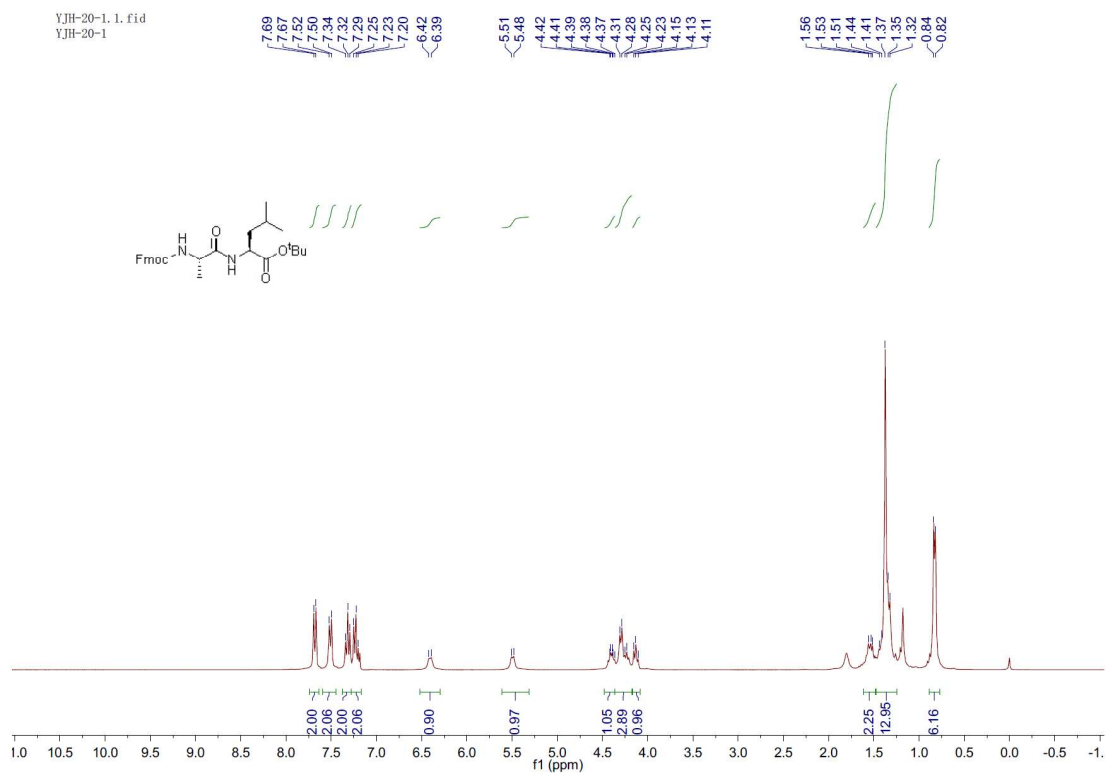

**Figure S28.**  $^1\text{H}$  NMR of compound **7a** in  $\text{CDCl}_3$ , 300 MHz for  $^1\text{H}$  NMR.

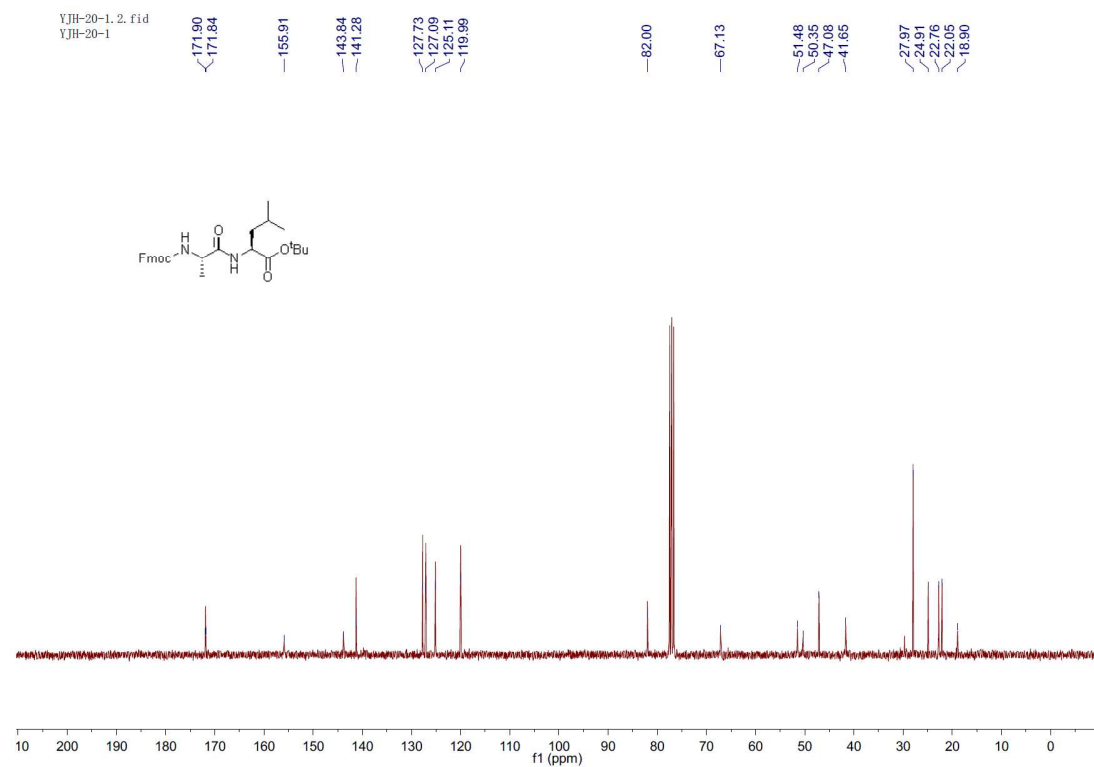

**Figure S29.**  $^{13}\text{C}$  NMR of compound **7a** in  $\text{CDCl}_3$ , 75 MHz for  $^{13}\text{C}$  NMR.

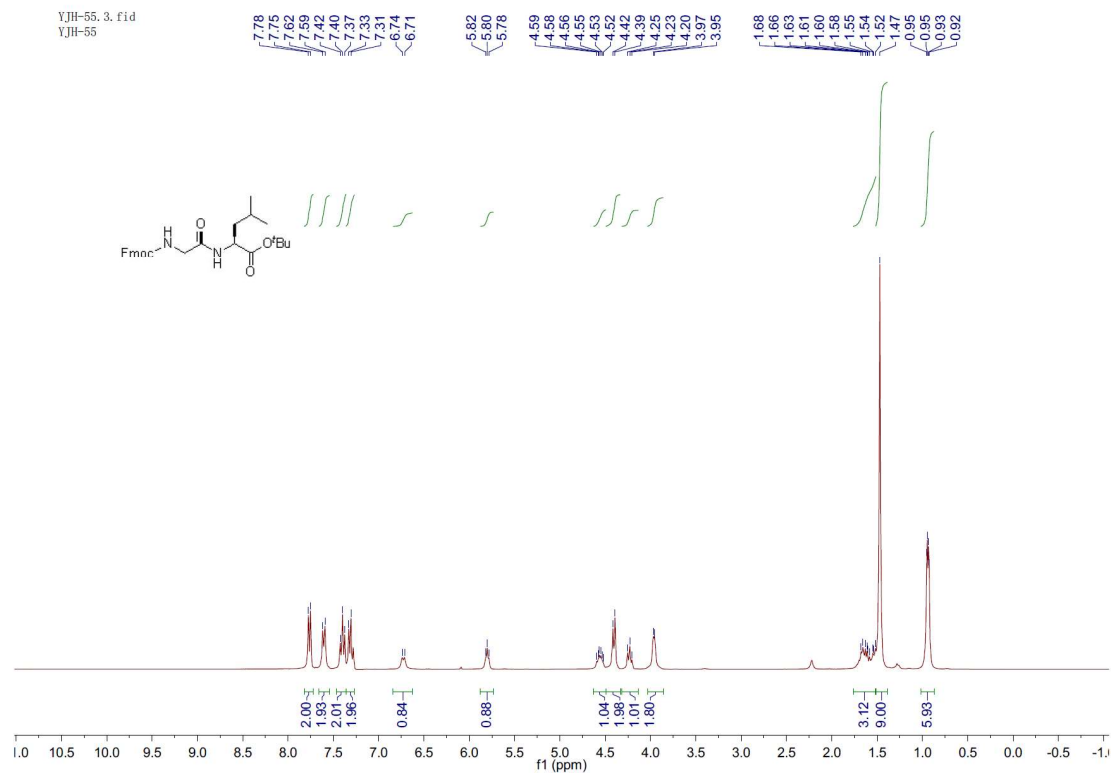

**Figure S30.**  $^1\text{H}$  NMR of compound **7b** in  $\text{CDCl}_3$ , 300 MHz for  $^1\text{H}$  NMR.

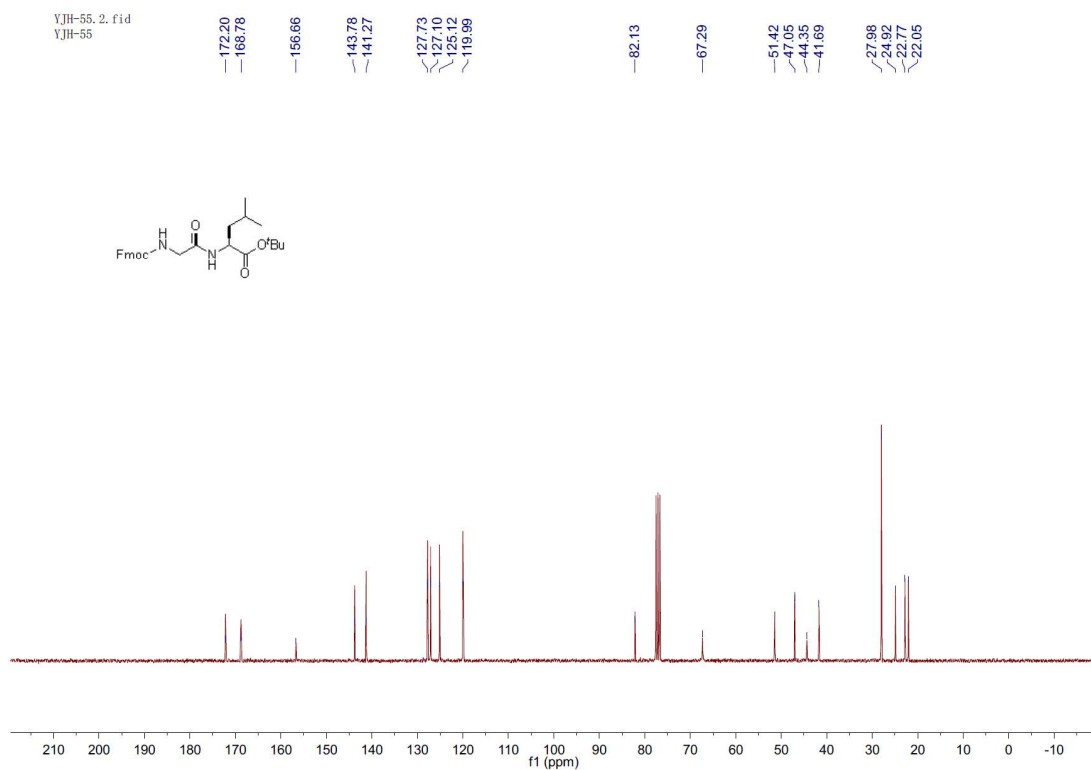

**Figure S31.**  $^{13}\text{C}$  NMR of compound **7b** in  $\text{CDCl}_3$ , 75 MHz for  $^{13}\text{C}$  NMR.

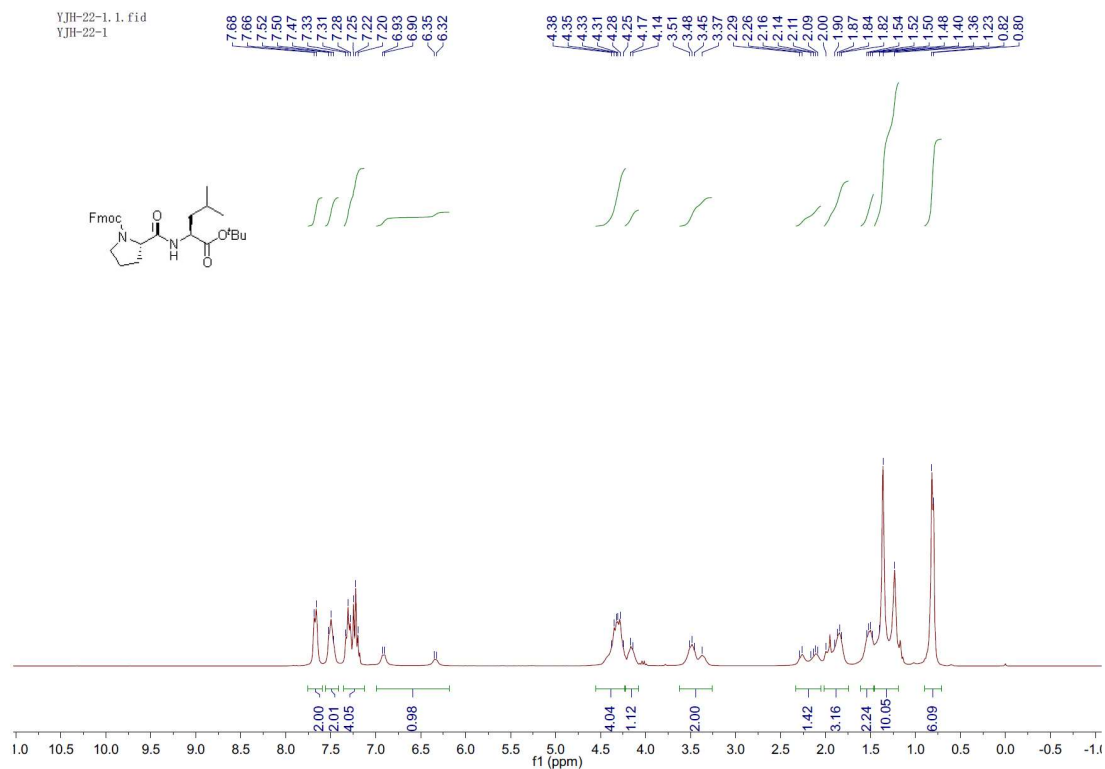

**Figure S32.**  $^1\text{H}$  NMR of compound **7c** in  $\text{CDCl}_3$ , 300 MHz for  $^1\text{H}$  NMR.

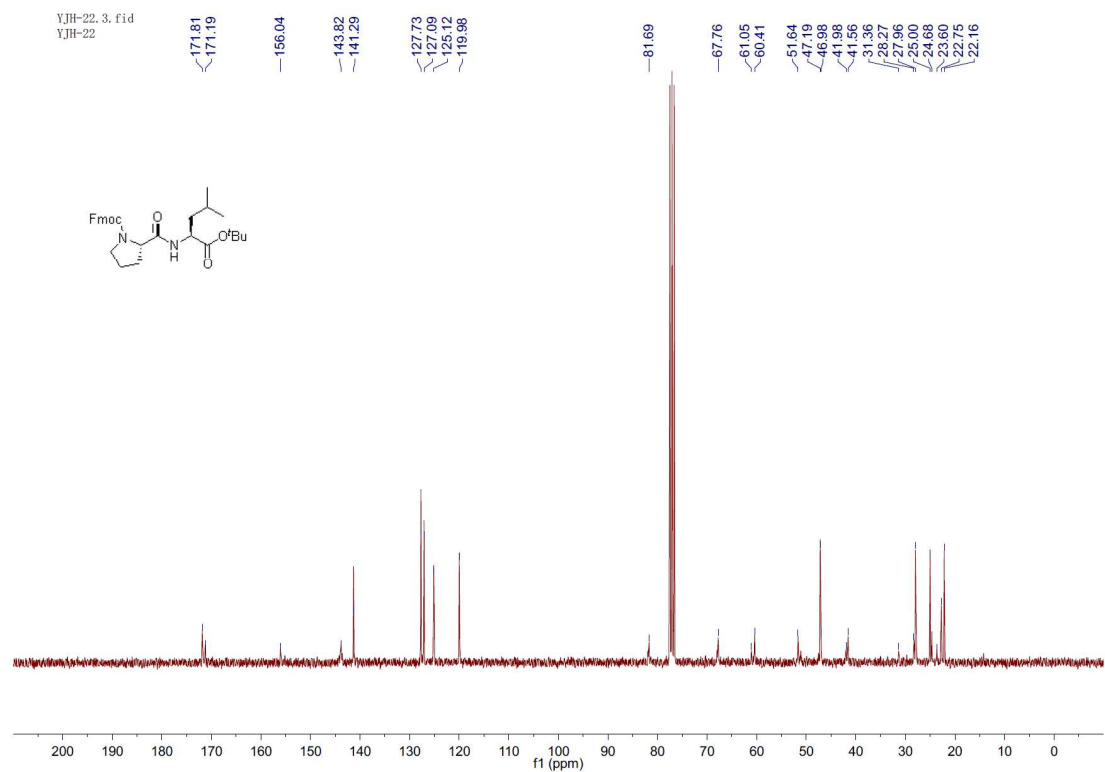

**Figure S33.**  $^{13}\text{C}$  NMR of compound **7c** in  $\text{CDCl}_3$ , 75 MHz for  $^{13}\text{C}$  NMR.

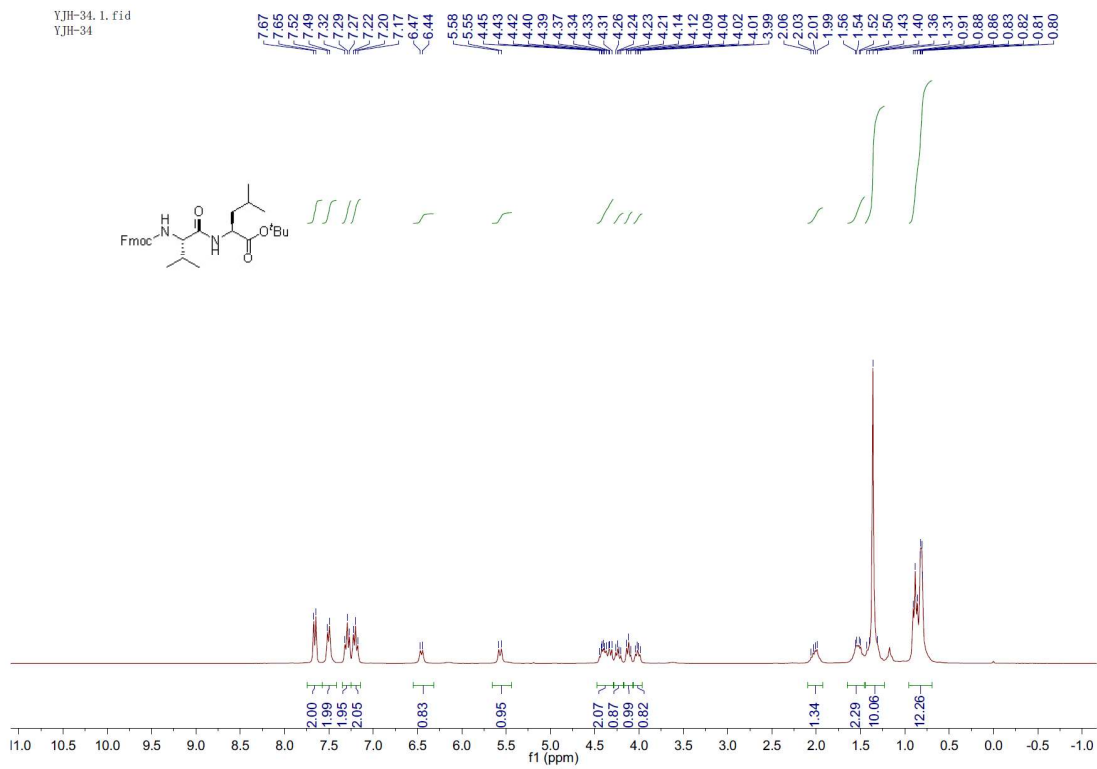

**Figure S34.**  $^1\text{H}$  NMR of compound **7d** in  $\text{CDCl}_3$ , 300 MHz for  $^1\text{H}$  NMR.

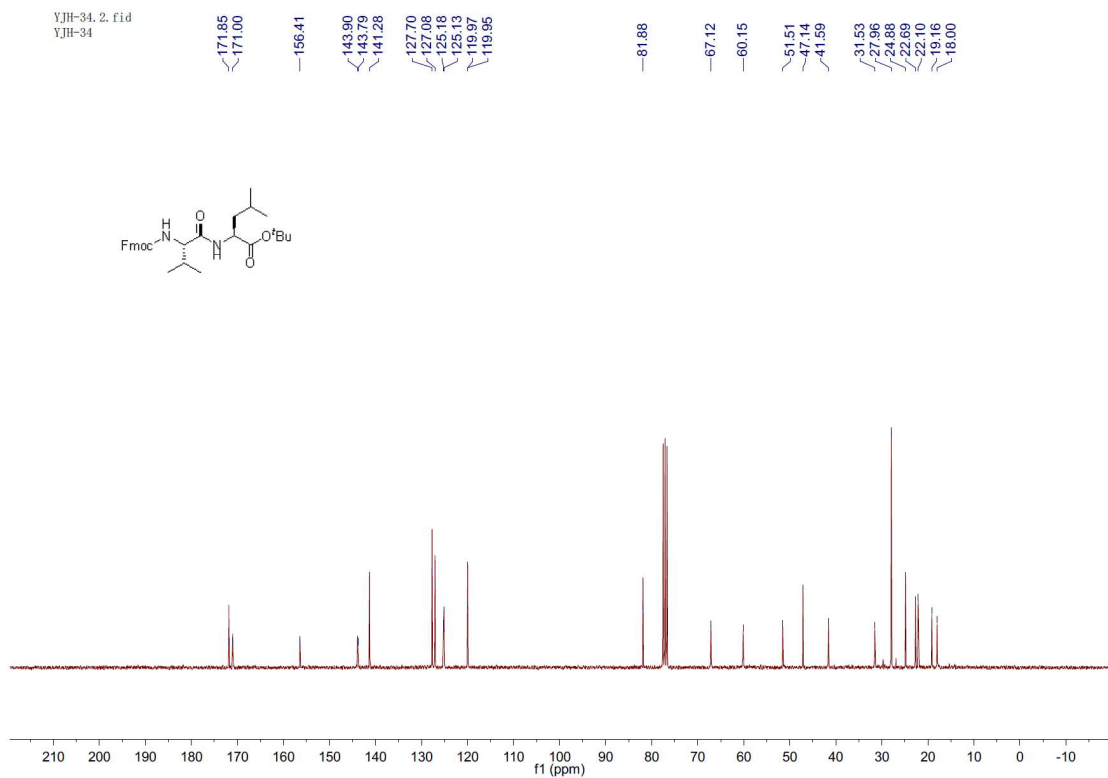

**Figure S35.**  $^{13}\text{C}$  NMR of compound **7d** in  $\text{CDCl}_3$ , 75 MHz for  $^{13}\text{C}$  NMR.

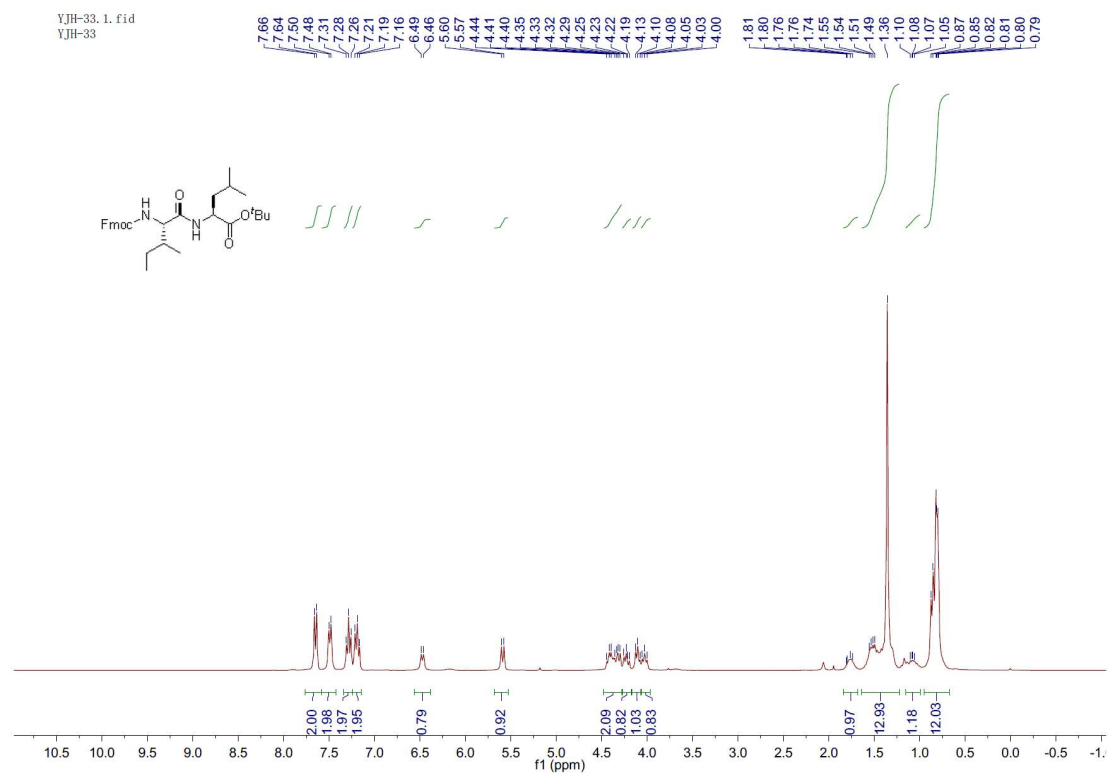

**Figure S36.** <sup>1</sup>H NMR of compound **7e** in CDCl<sub>3</sub>, 300 MHz for <sup>1</sup>H NMR.

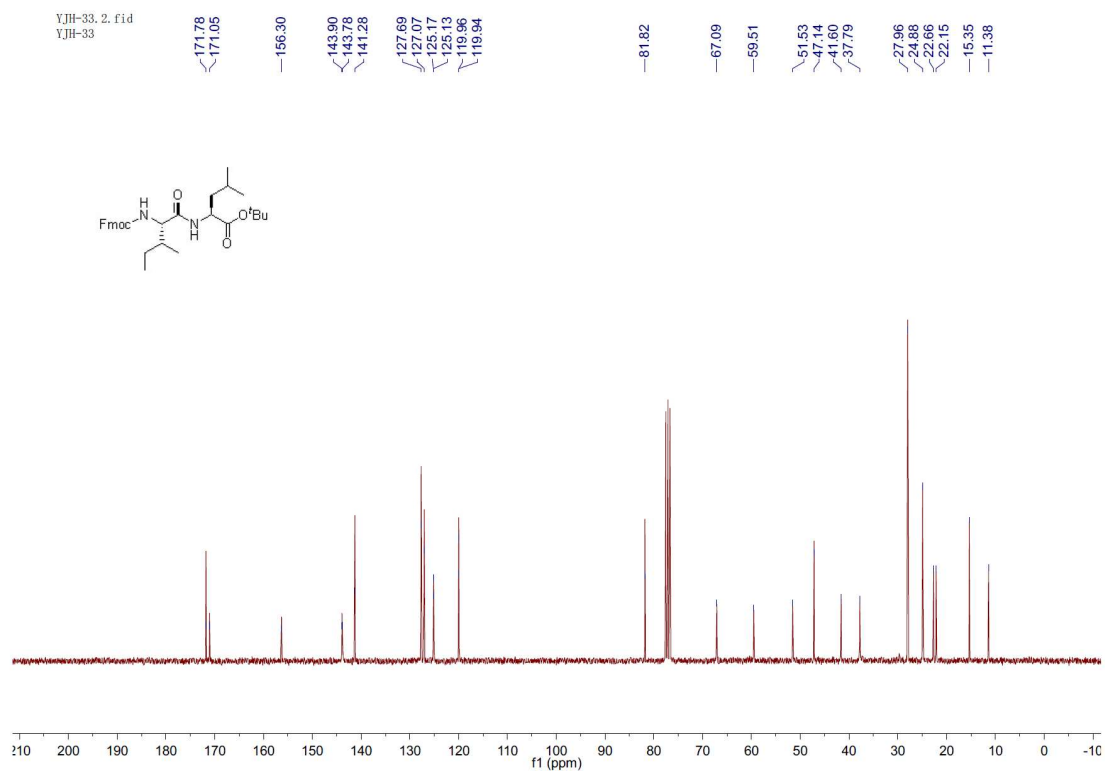

**Figure S37.** <sup>13</sup>C NMR of compound **7e** in CDCl<sub>3</sub>, 75 MHz for <sup>13</sup>C NMR.



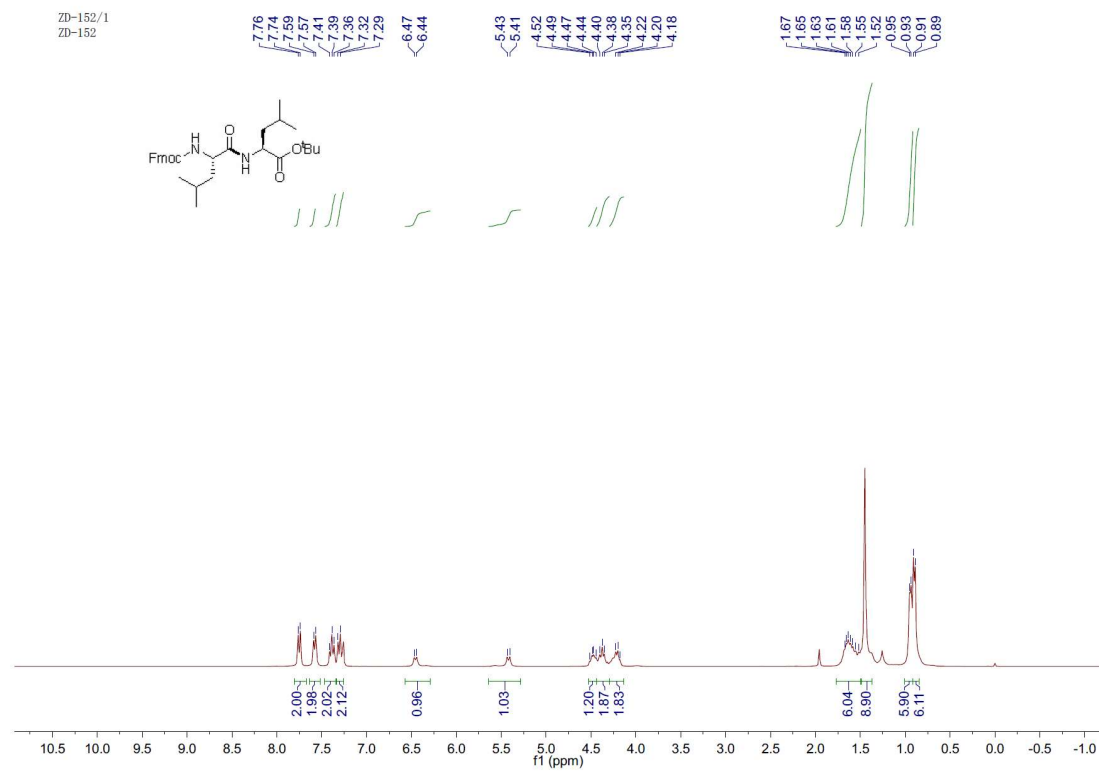

**Figure S38.**  $^1\text{H}$  NMR of compound **7f** in  $\text{CDCl}_3$ , 300 MHz for  $^1\text{H}$  NMR.

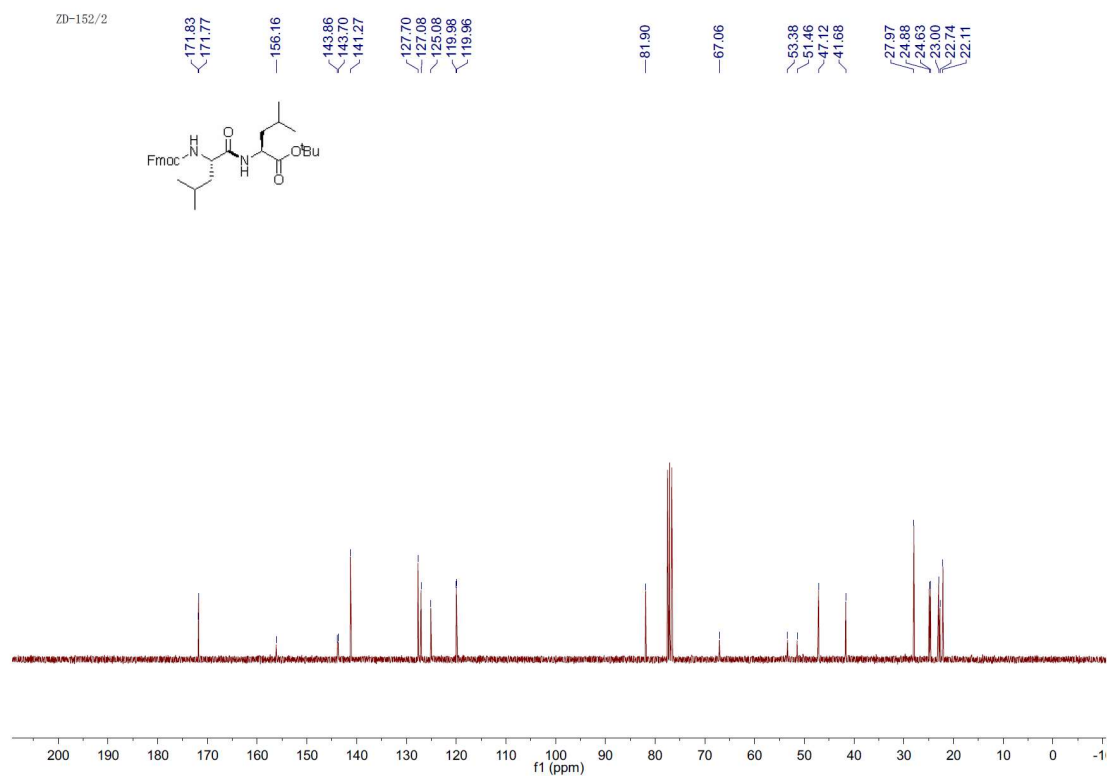

**Figure S39.**  $^{13}\text{C}$  NMR of compound **7f** in  $\text{CDCl}_3$ , 75 MHz for  $^{13}\text{C}$  NMR.

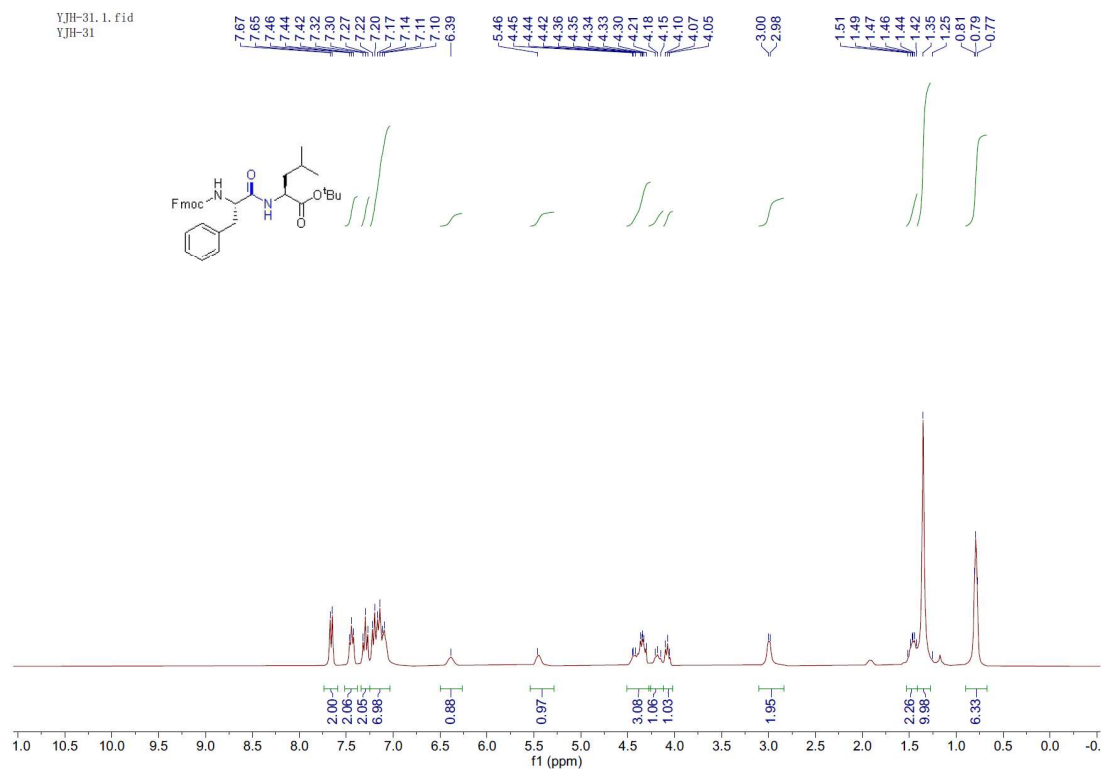

**Figure S40.**  $^1\text{H}$  NMR of compound **7g** in  $\text{CDCl}_3$ , 300 MHz for  $^1\text{H}$  NMR.

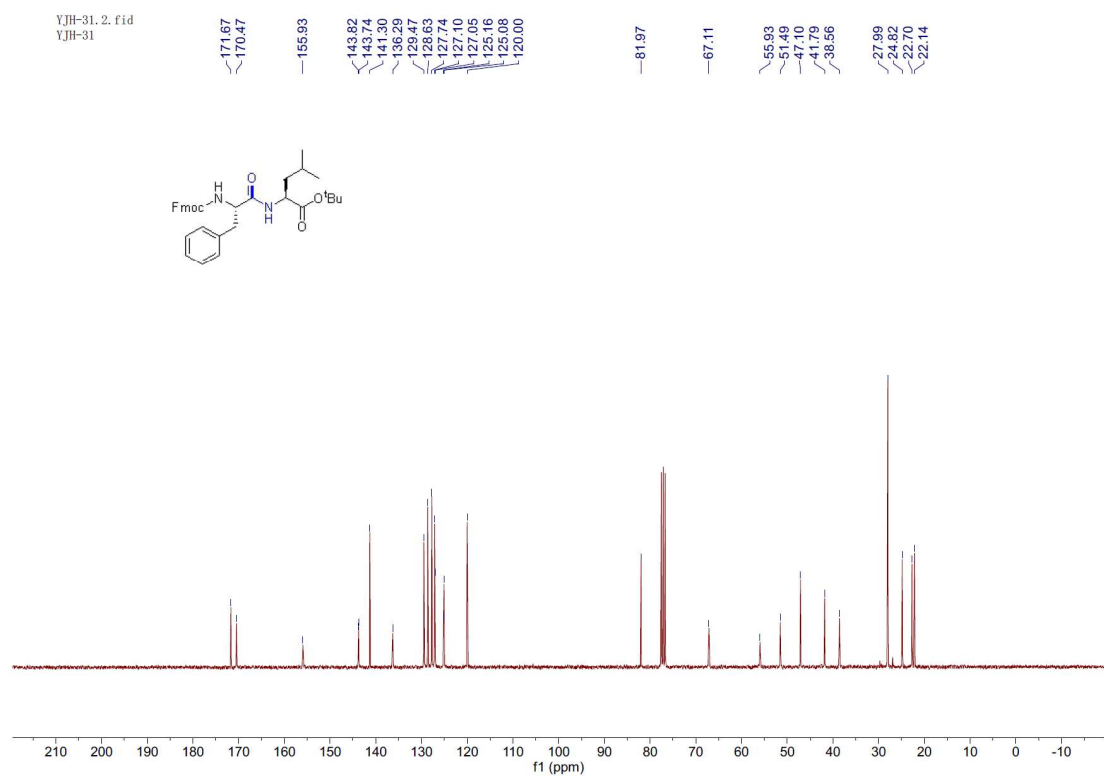

**Figure S41.**  $^{13}\text{C}$  NMR of compound **7g** in  $\text{CDCl}_3$ , 75 MHz for  $^{13}\text{C}$  NMR.

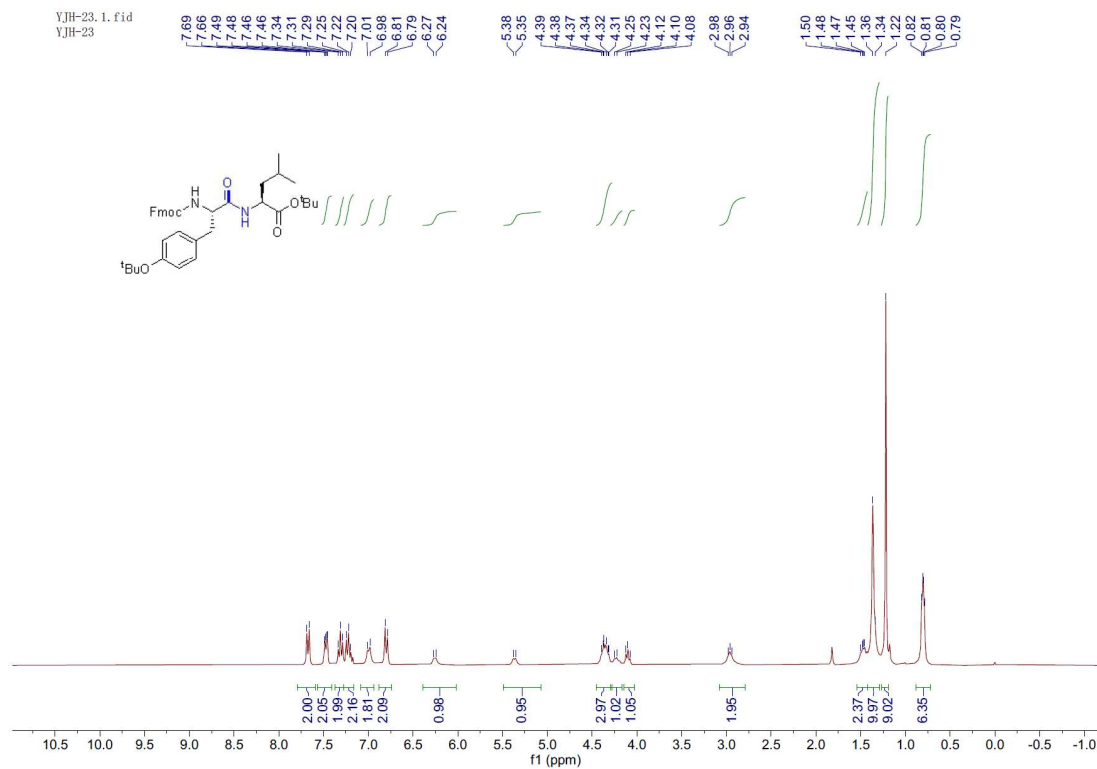

**Figure S42.**  $^1\text{H}$  NMR of compound **7h** in  $\text{CDCl}_3$ , 300 MHz for  $^1\text{H}$  NMR.

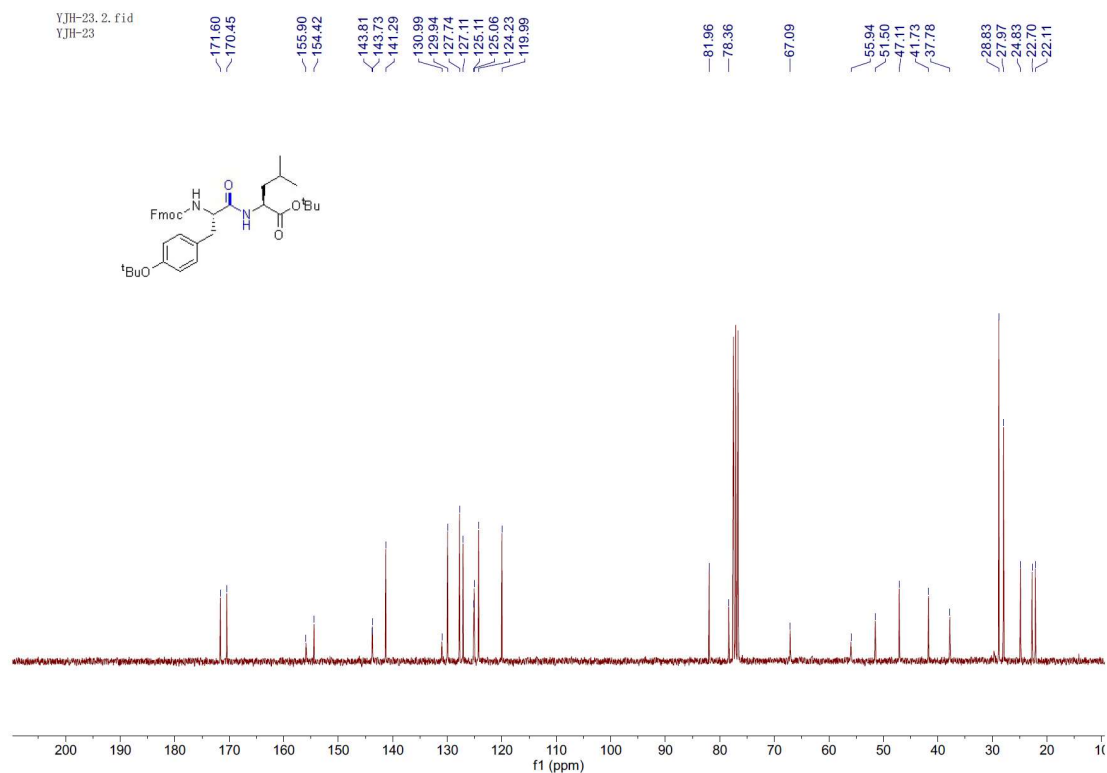

**Figure S43.**  $^{13}\text{C}$  NMR of compound **7h** in  $\text{CDCl}_3$ , 75 MHz for  $^{13}\text{C}$  NMR.

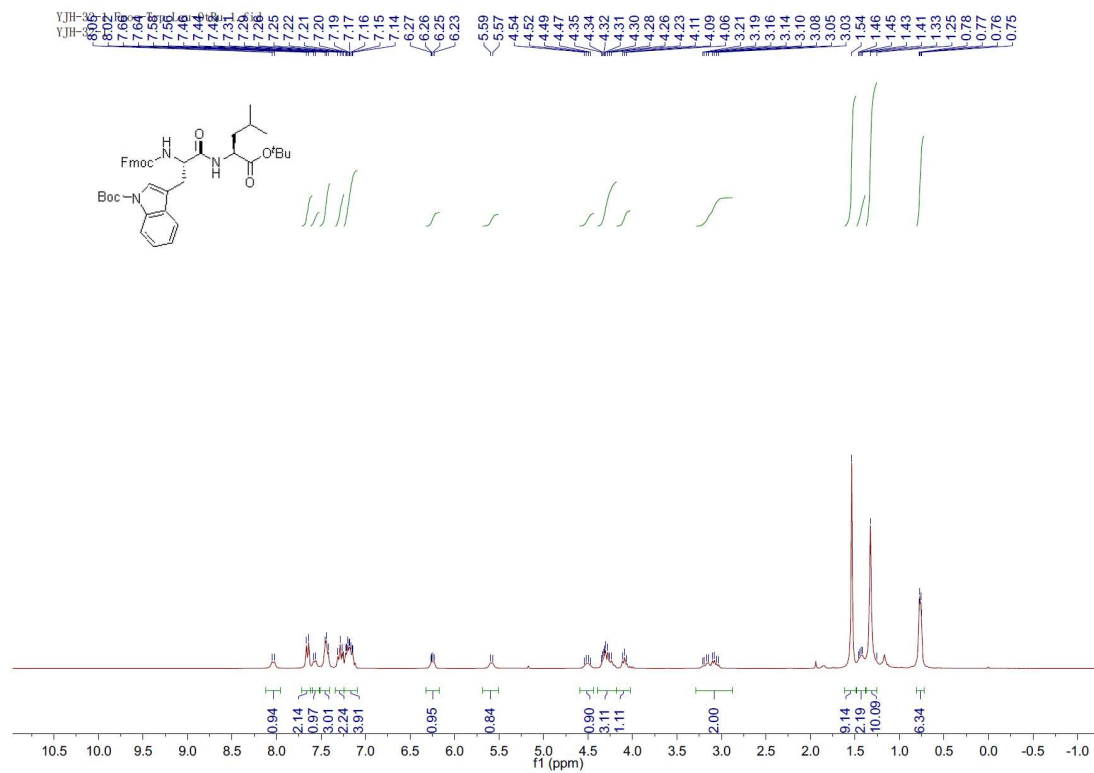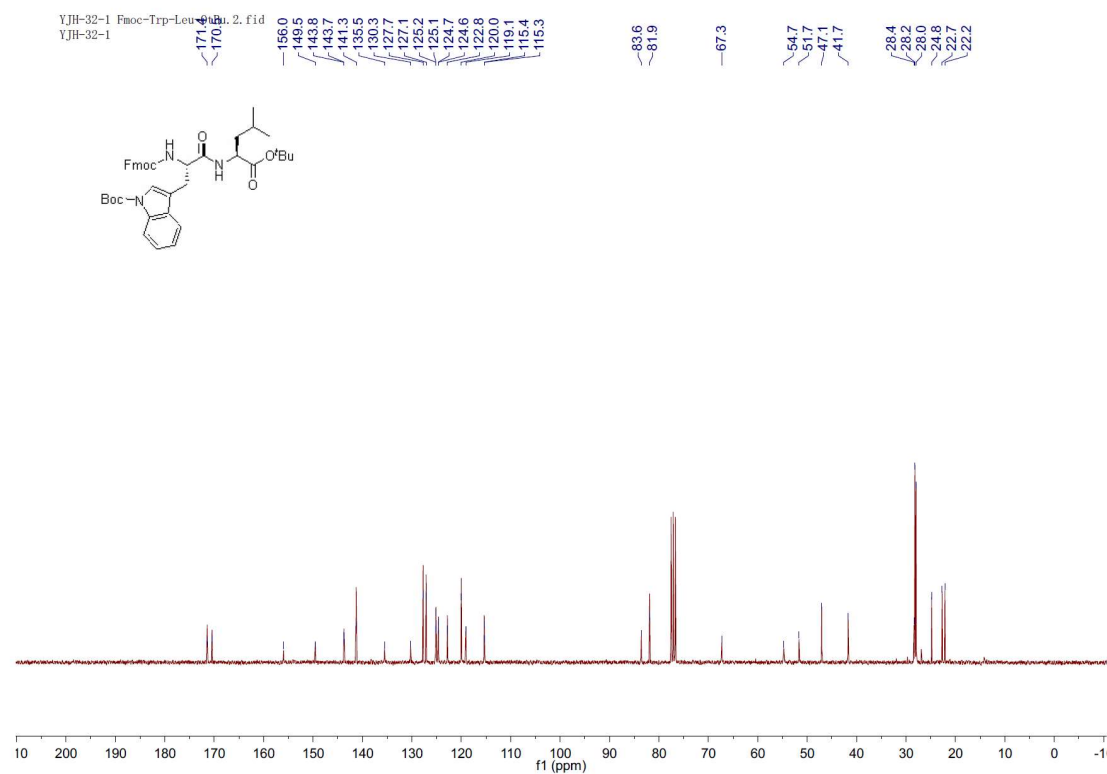

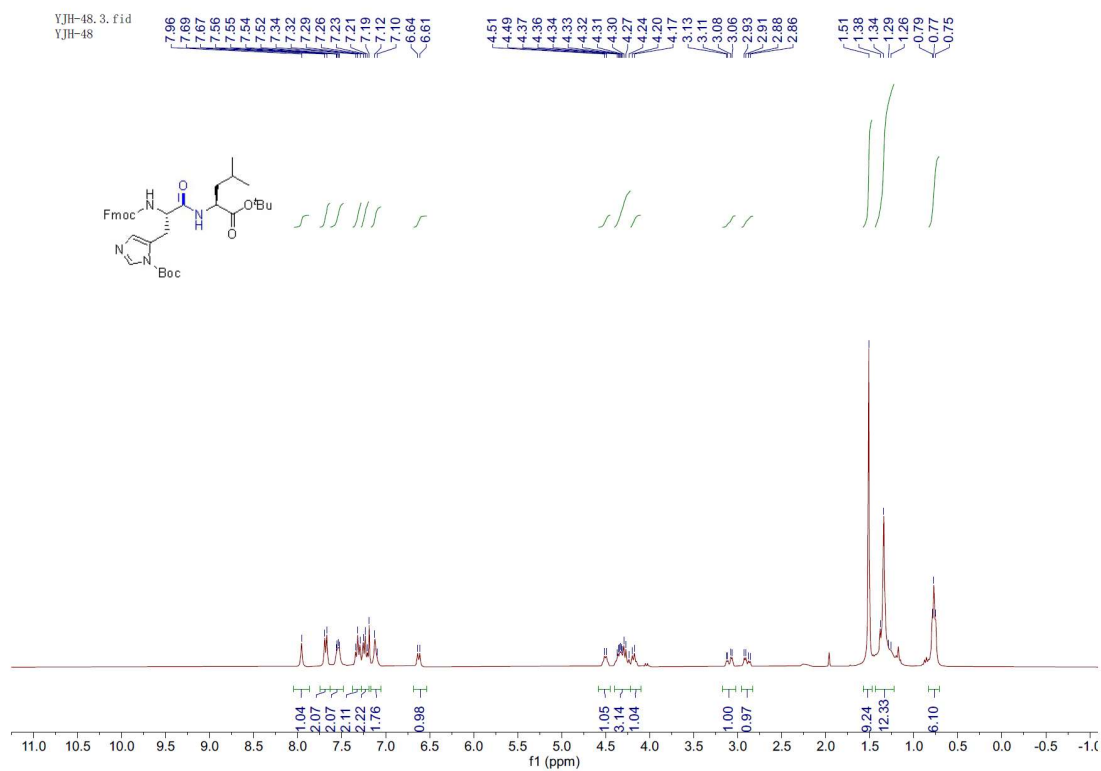

**Figure S46.**  $^1\text{H}$  NMR of compound **7j** in  $\text{CDCl}_3$ , 300 MHz for  $^1\text{H}$  NMR.

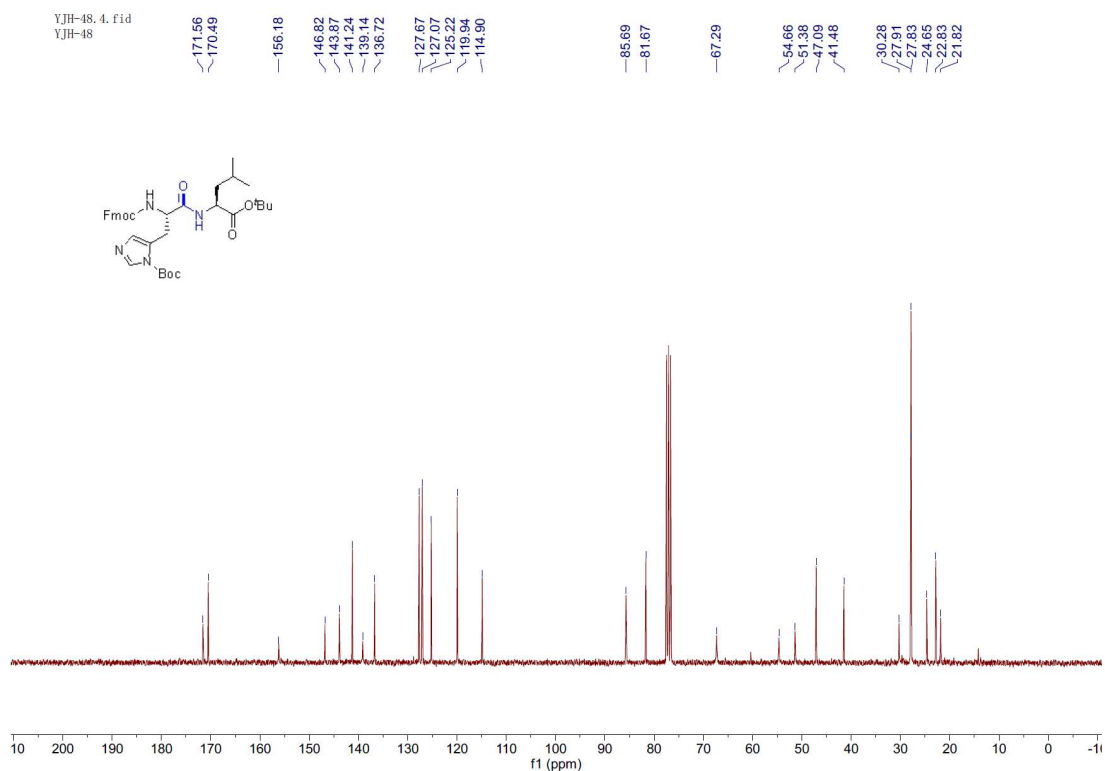

**Figure S47.**  $^{13}\text{C}$  NMR of compound **7j** in  $\text{CDCl}_3$ , 75 MHz for  $^{13}\text{C}$  NMR.

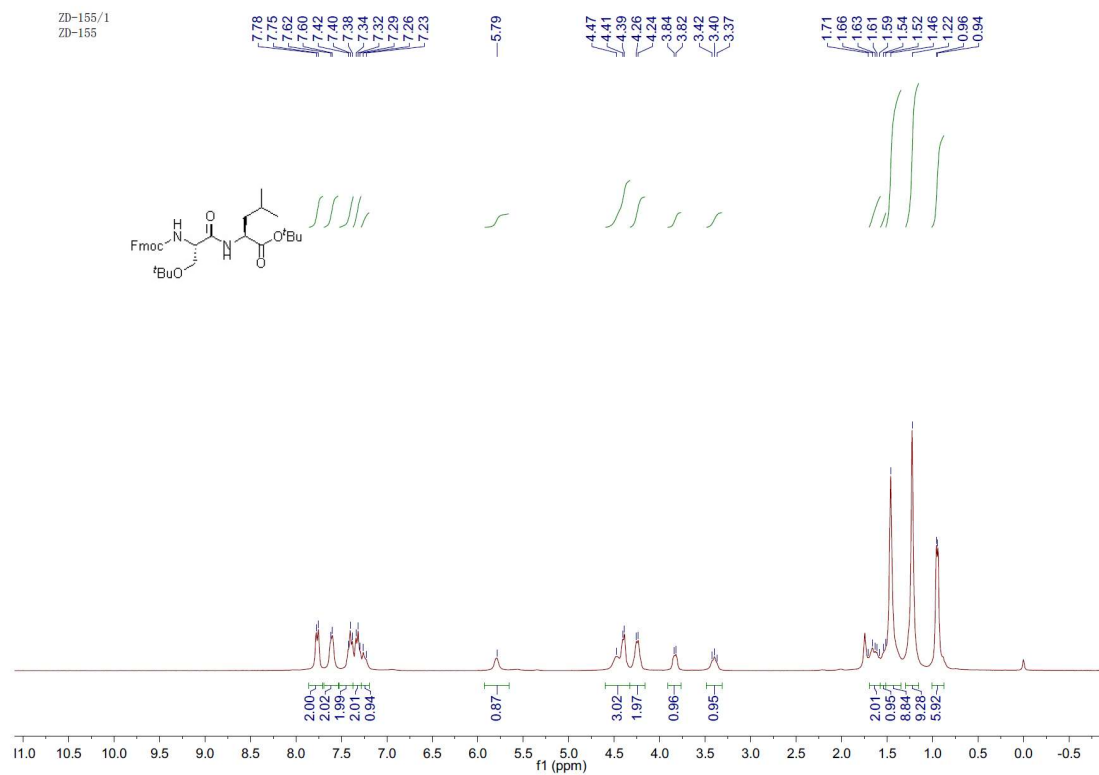

**Figure S48.**  $^1\text{H}$  NMR of compound **7k** in  $\text{CDCl}_3$ , 300 MHz for  $^1\text{H}$  NMR.

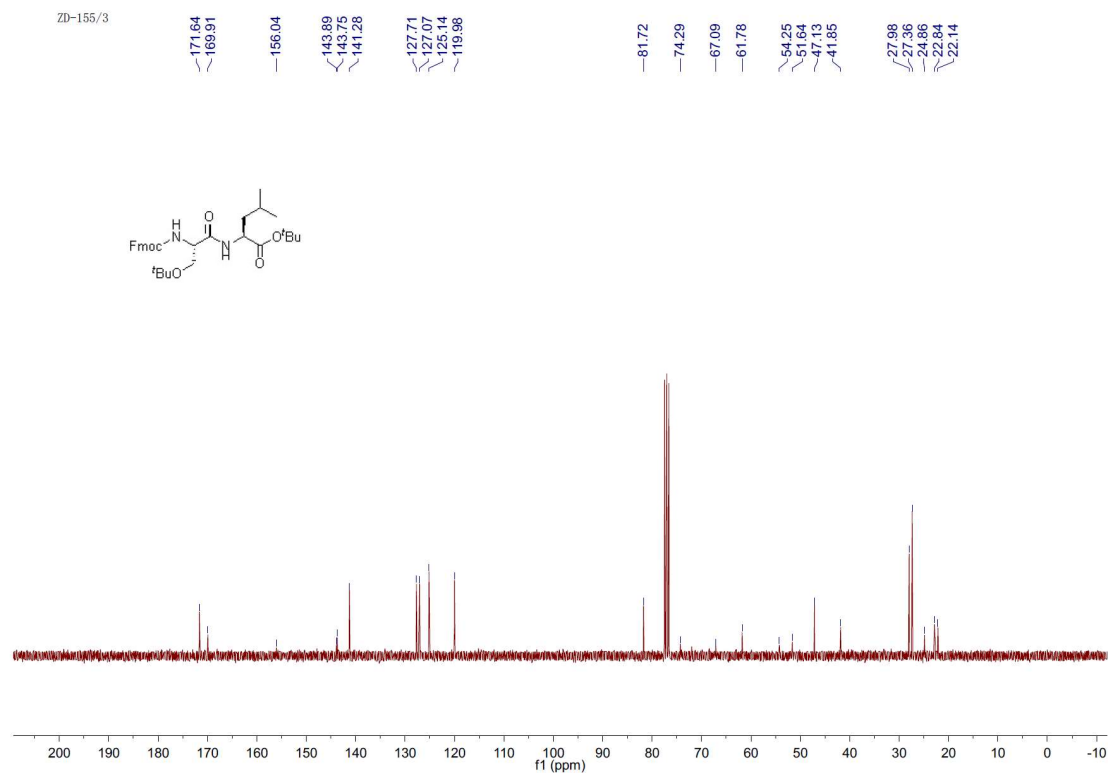

**Figure S49.**  $^{13}\text{C}$  NMR of compound **7k** in  $\text{CDCl}_3$ , 75 MHz for  $^{13}\text{C}$  NMR.

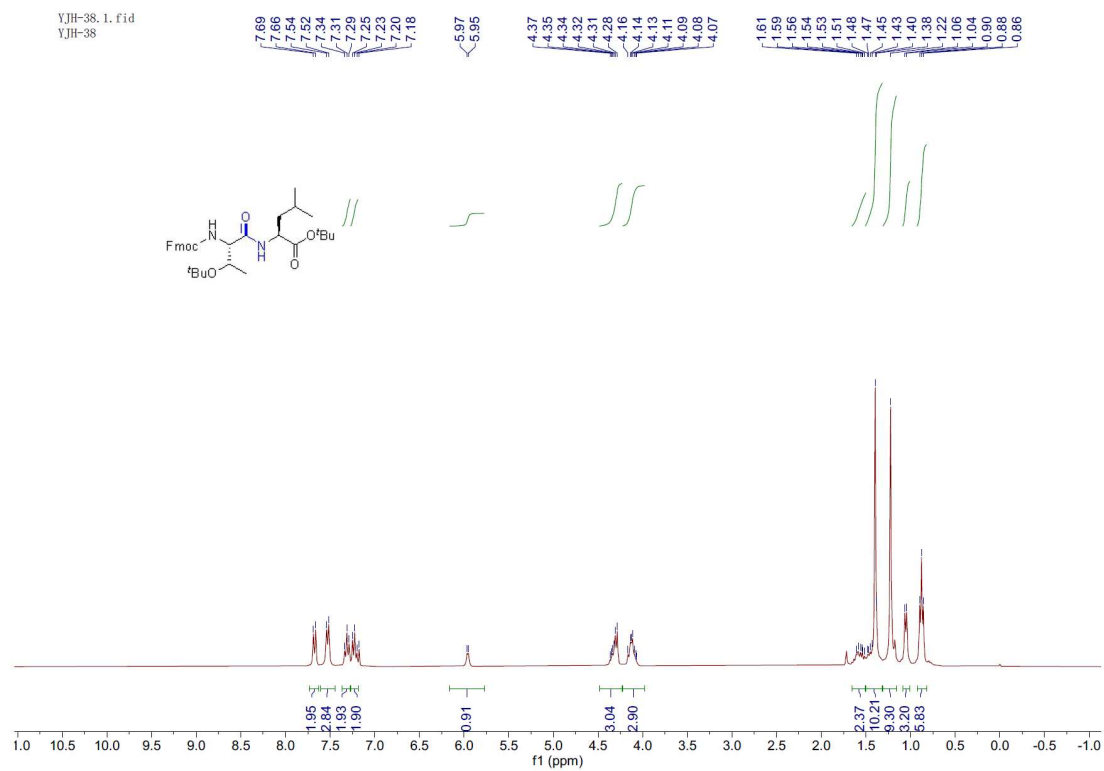

**Figure S50.** <sup>1</sup>H NMR of compound **71** in CDCl<sub>3</sub>, 300 MHz for <sup>1</sup>H NMR.

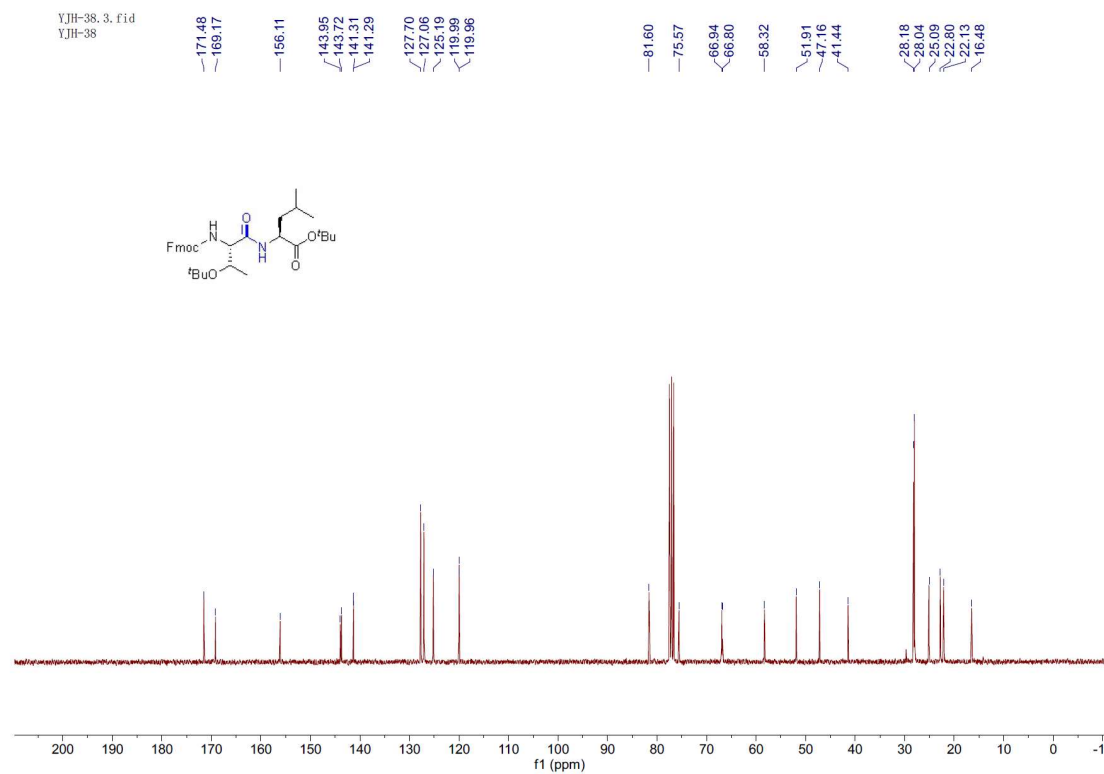

**Figure S51.** <sup>13</sup>C NMR of compound **71** in CDCl<sub>3</sub>, 75 MHz for <sup>13</sup>C NMR.

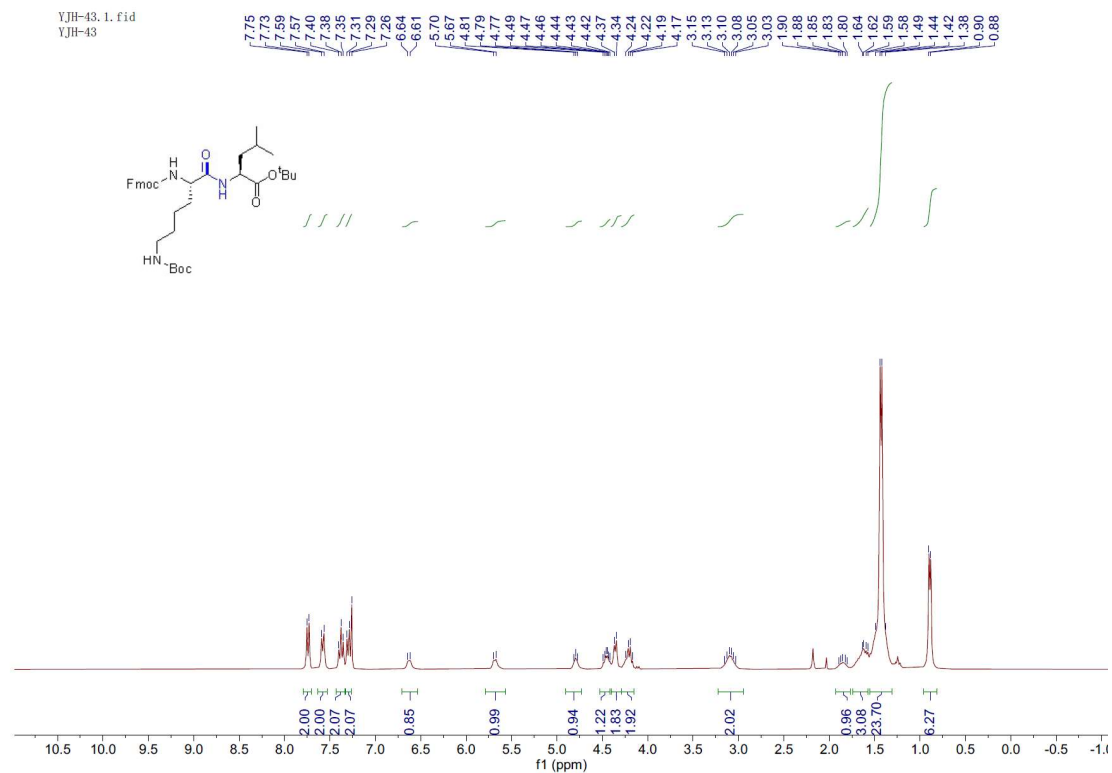

**Figure S52.**  $^1\text{H}$  NMR of compound **7m** in  $\text{CDCl}_3$ , 300 MHz for  $^1\text{H}$  NMR.

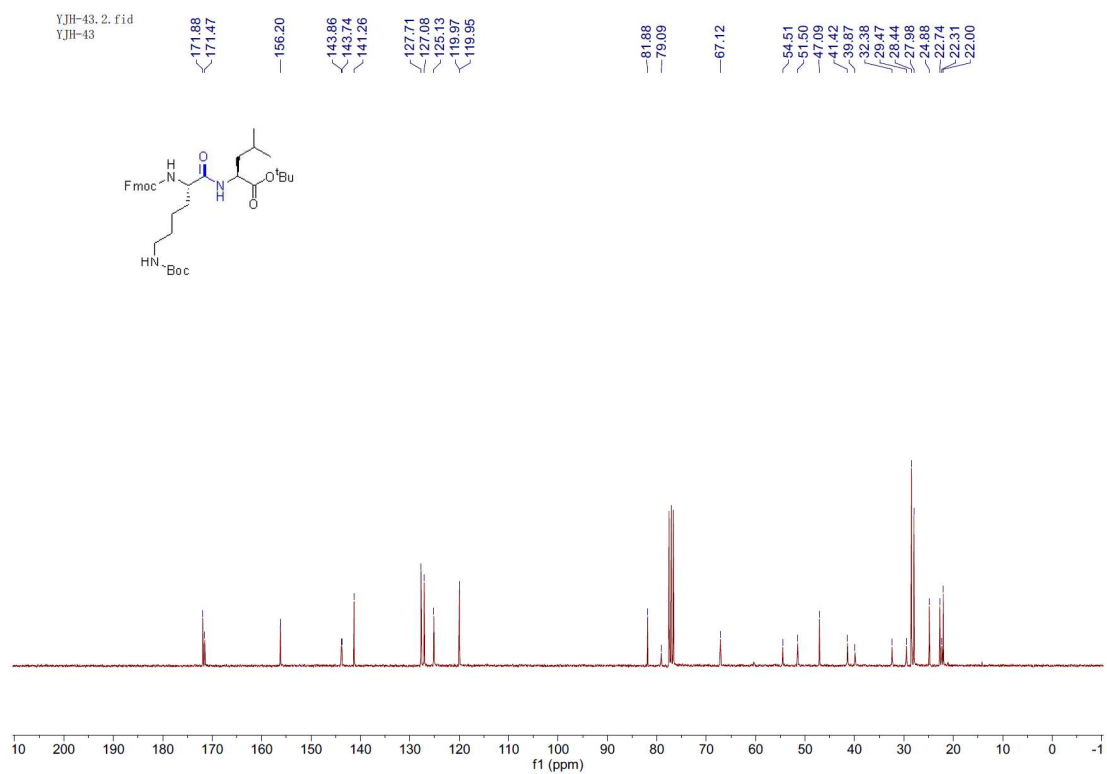

**Figure S53.**  $^{13}\text{C}$  NMR of compound **7m** in  $\text{CDCl}_3$ , 75 MHz for  $^{13}\text{C}$  NMR.



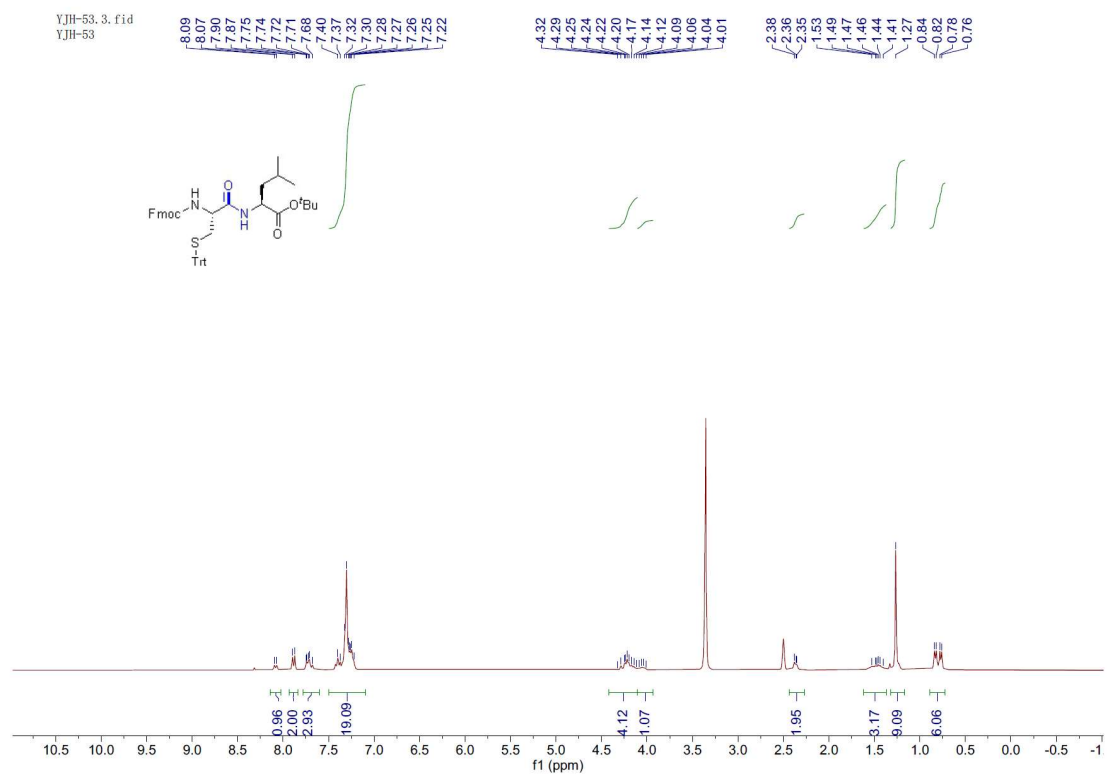

**Figure S54.**  $^1\text{H}$  NMR of compound **7n** in  $\text{CDCl}_3$ , 300 MHz for  $^1\text{H}$  NMR.

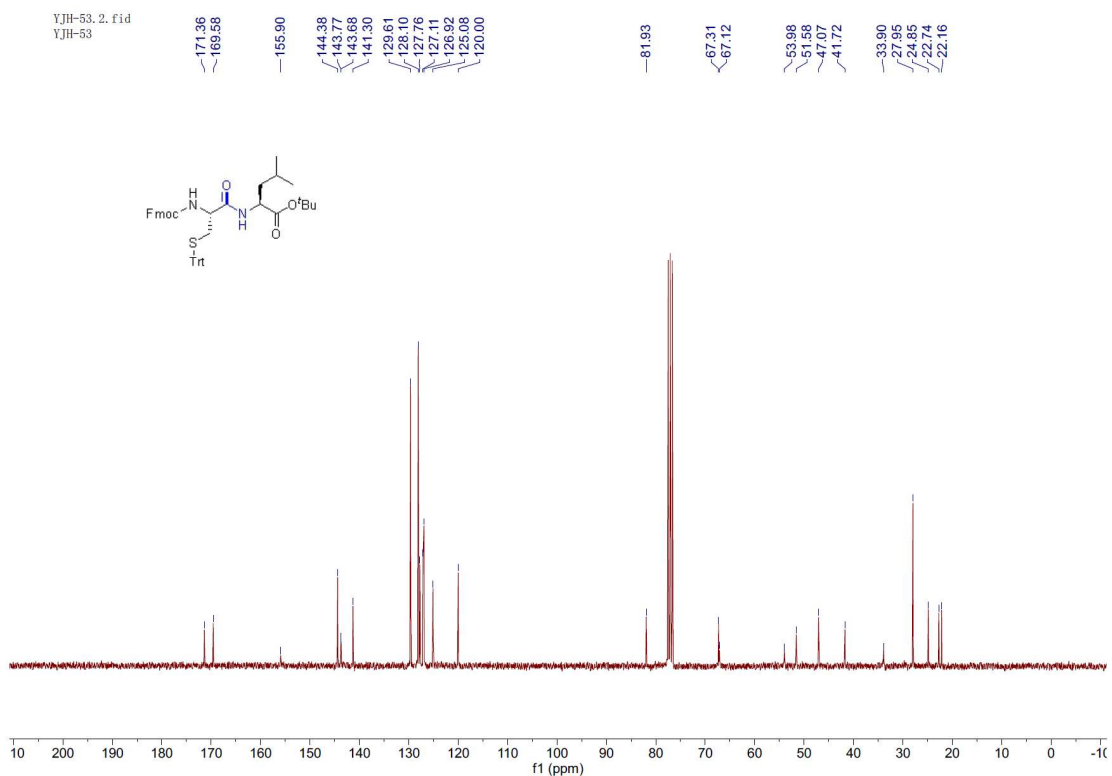

**Figure S55**  $^{13}\text{C}$  NMR of compound **7n** in  $\text{CDCl}_3$ , 75 MHz for  $^{13}\text{C}$  NMR.

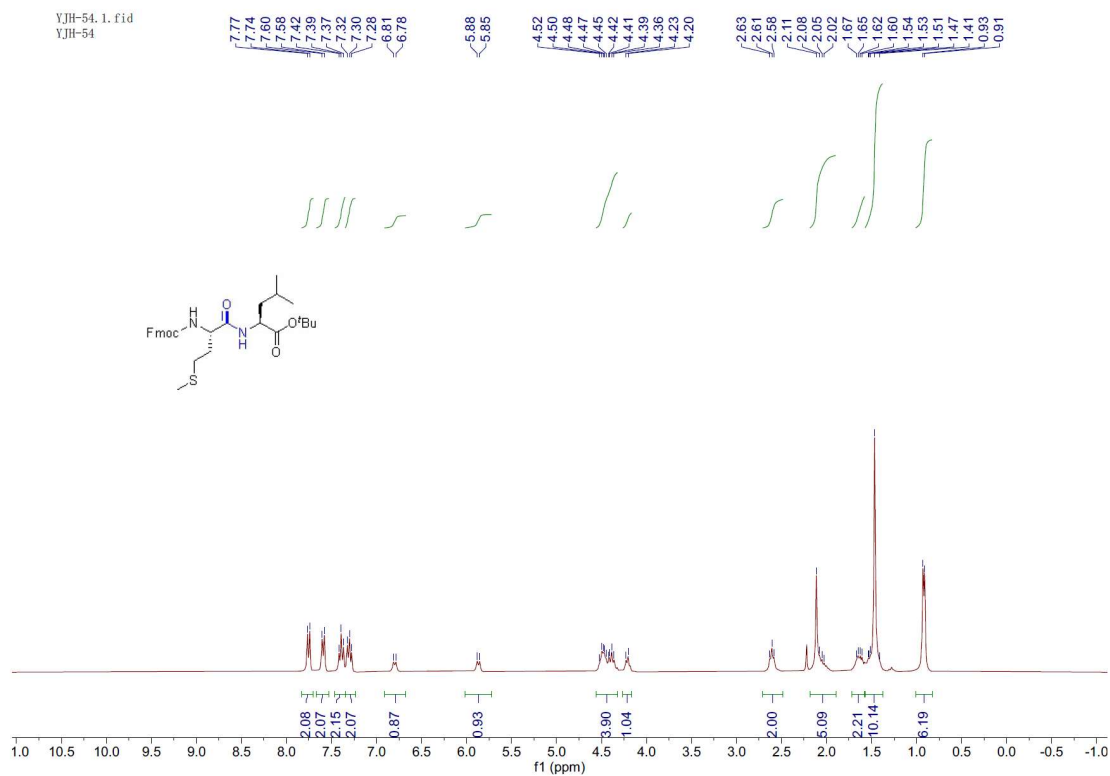

**Figure S56.**  $^1\text{H}$  NMR of compound **7o** in  $\text{CDCl}_3$ , 300 MHz for  $^1\text{H}$  NMR.

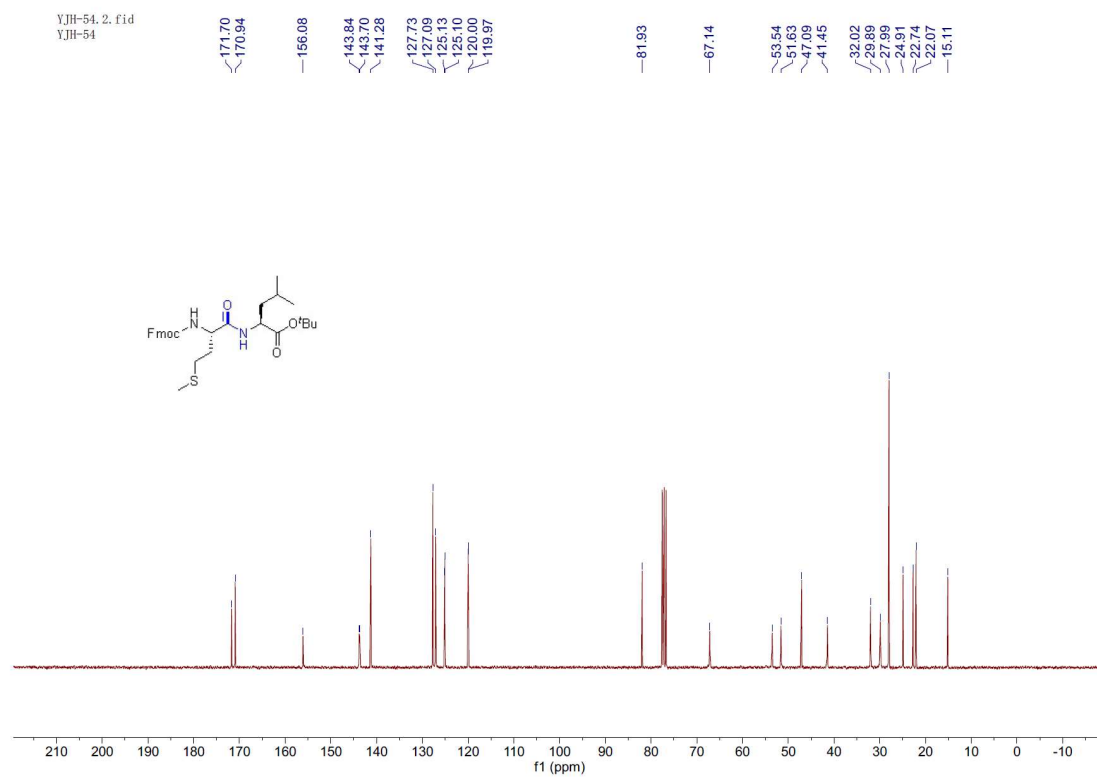

**Figure S57.**  $^{13}\text{C}$  NMR of compound **7o** in  $\text{CDCl}_3$ , 75 MHz for  $^{13}\text{C}$  NMR.

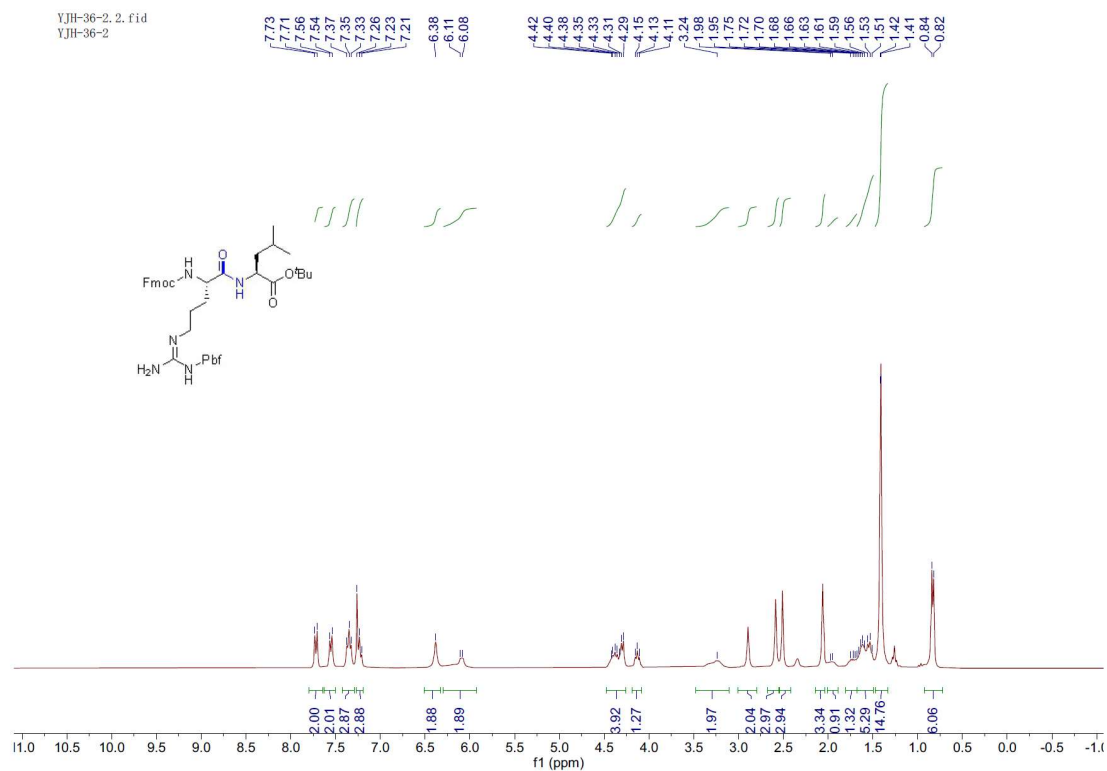

**Figure S58.**  $^1\text{H}$  NMR of compound **7p** in  $\text{CDCl}_3$ , 300 MHz for  $^1\text{H}$  NMR.

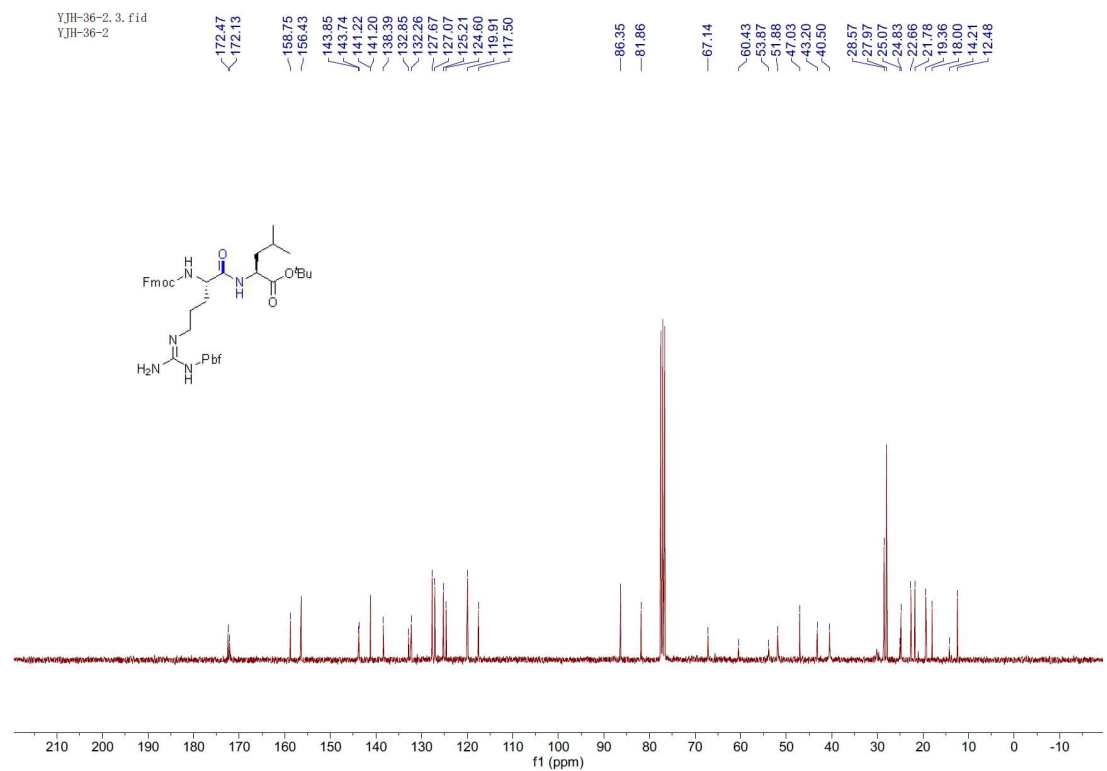

**Figure S59.**  $^{13}\text{C}$  NMR of compound **7p** in  $\text{CDCl}_3$ , 75 MHz for  $^{13}\text{C}$  NMR.

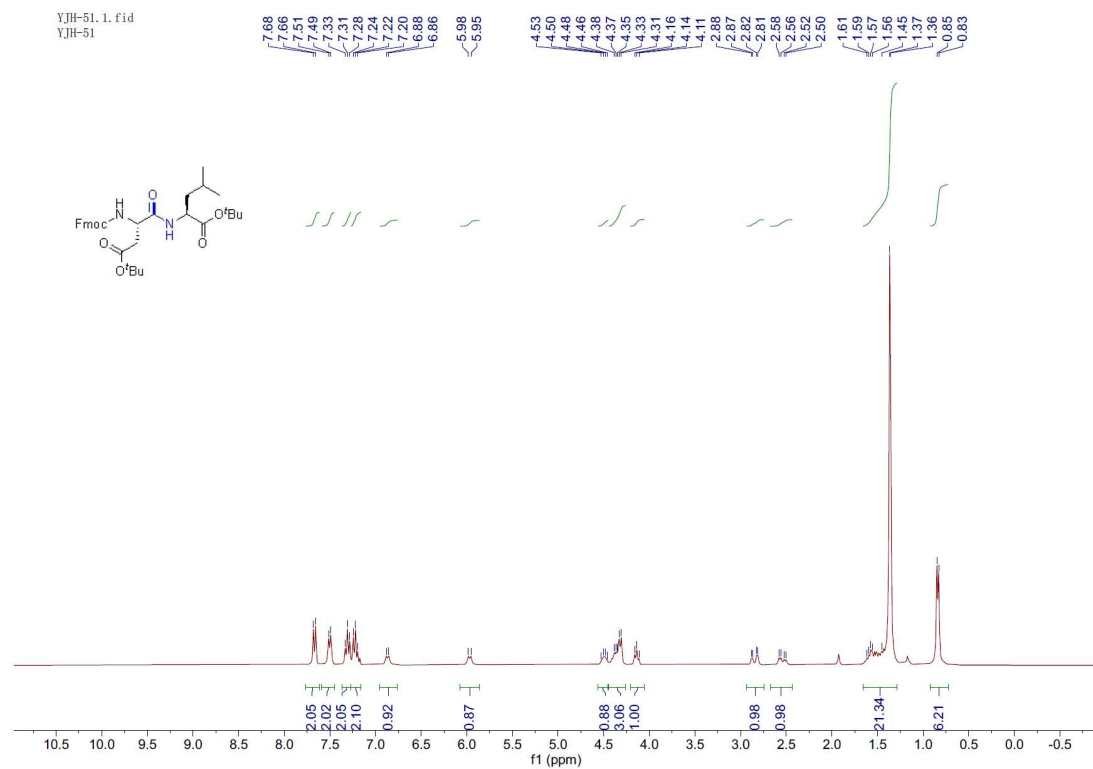

**Figure S60.**  $^1\text{H}$  NMR of compound **7q** in  $\text{CDCl}_3$ , 300 MHz for  $^1\text{H}$  NMR.

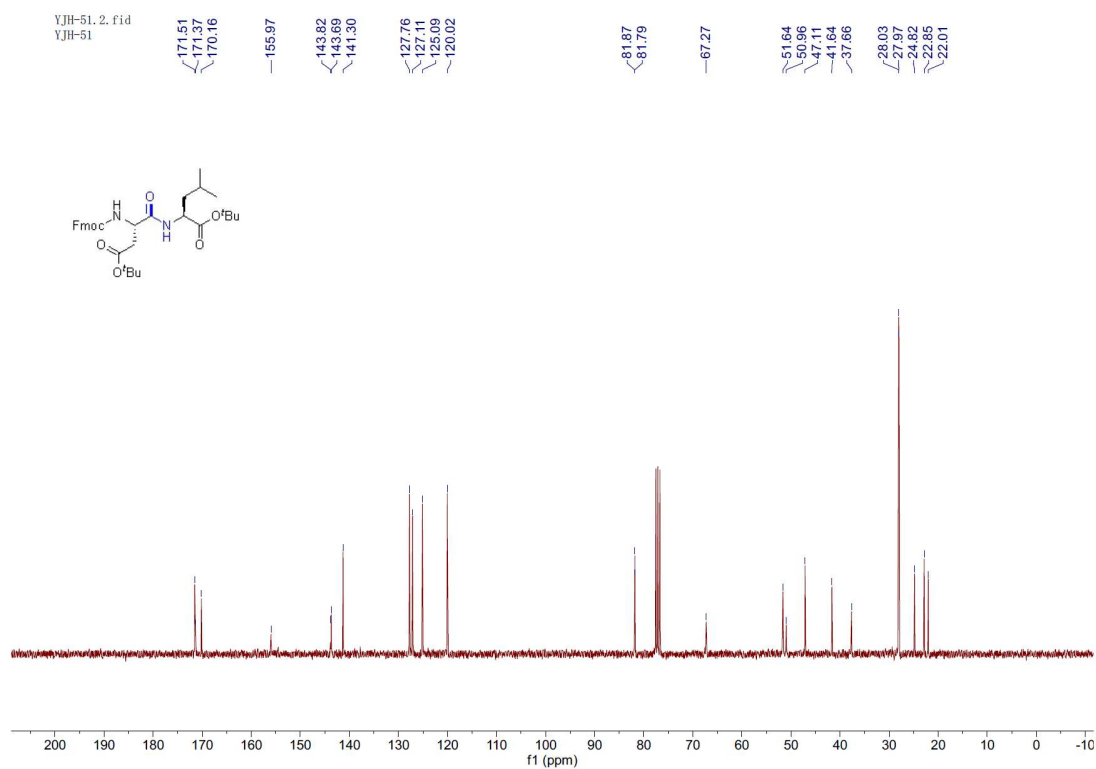

**Figure S61.**  $^{13}\text{C}$  NMR of compound **7q** in  $\text{CDCl}_3$ , 75 MHz for  $^{13}\text{C}$  NMR.

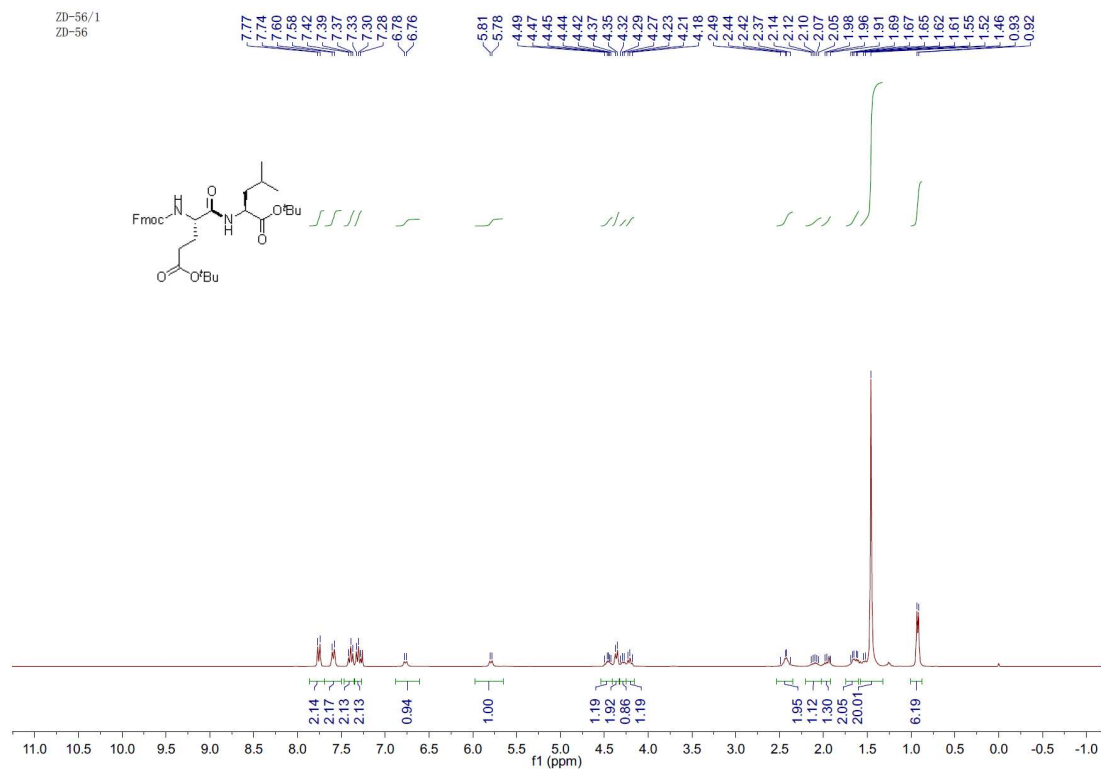

**Figure S62.**  $^1\text{H}$  NMR of compound **7r** in  $\text{CDCl}_3$ , 300 MHz for  $^1\text{H}$  NMR.

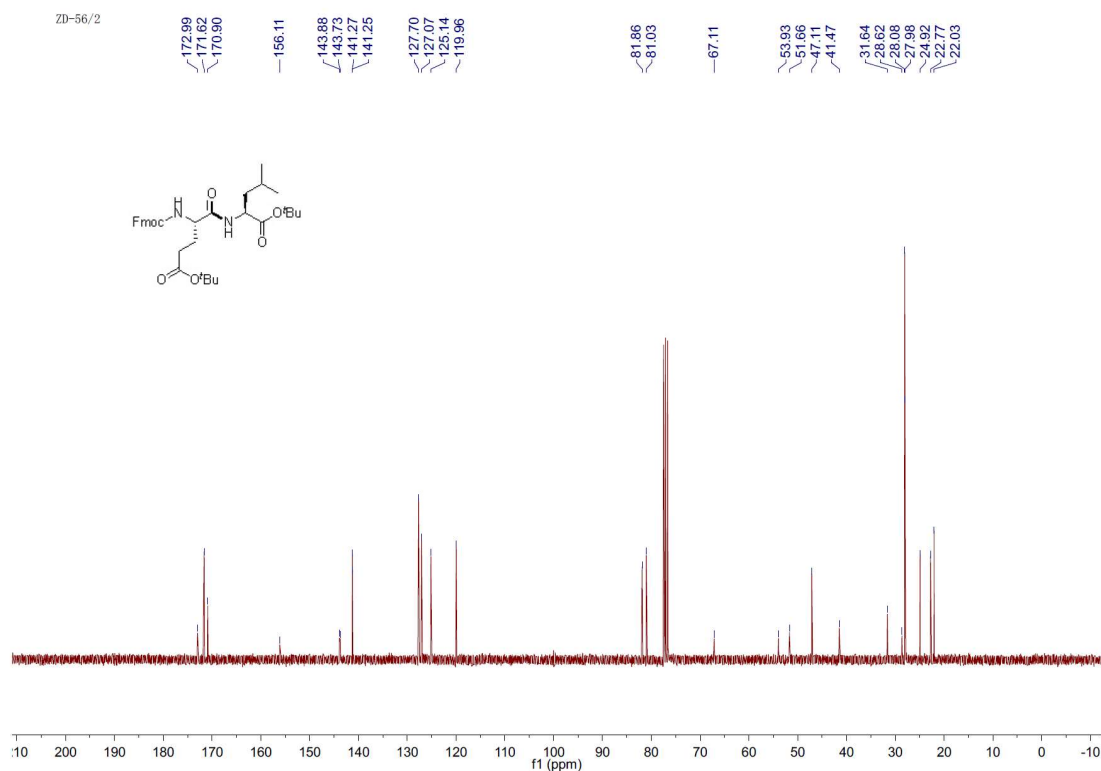

**Figure S63.**  $^{13}\text{C}$  NMR of compound **7r** in  $\text{CDCl}_3$ , 75 MHz for  $^{13}\text{C}$  NMR.

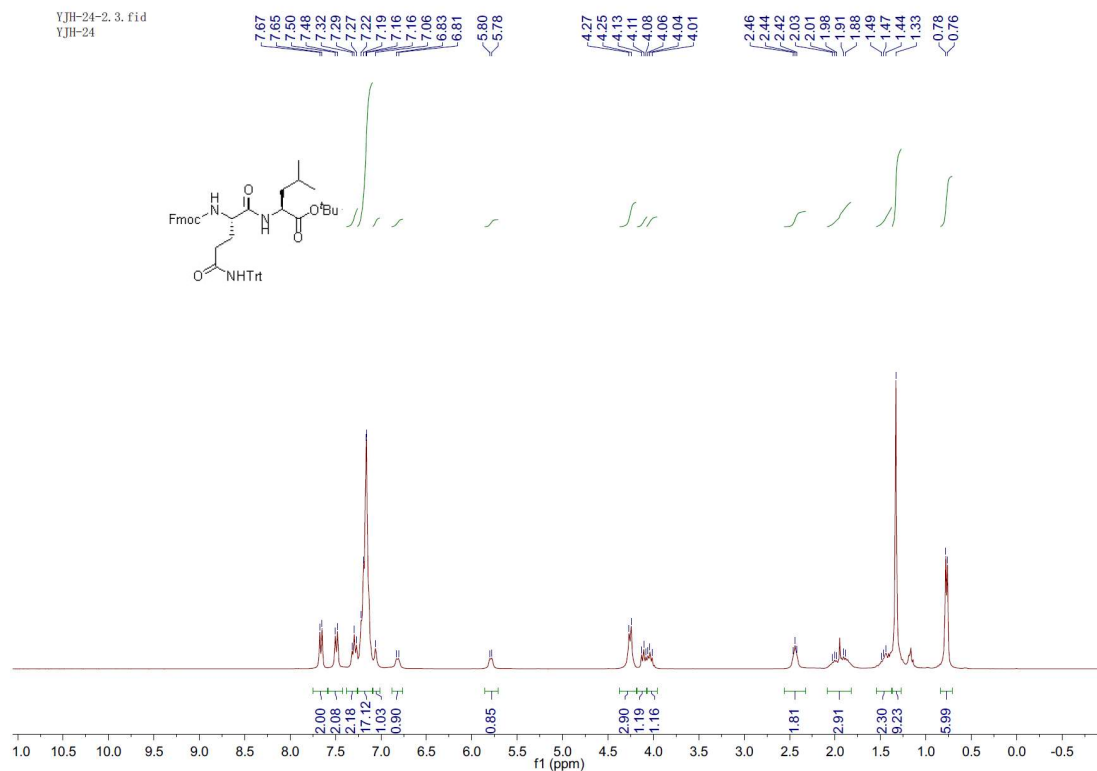

**Figure S64.**  $^1\text{H}$  NMR of compound **7s** in  $\text{CDCl}_3$ , 300 MHz for  $^1\text{H}$  NMR.

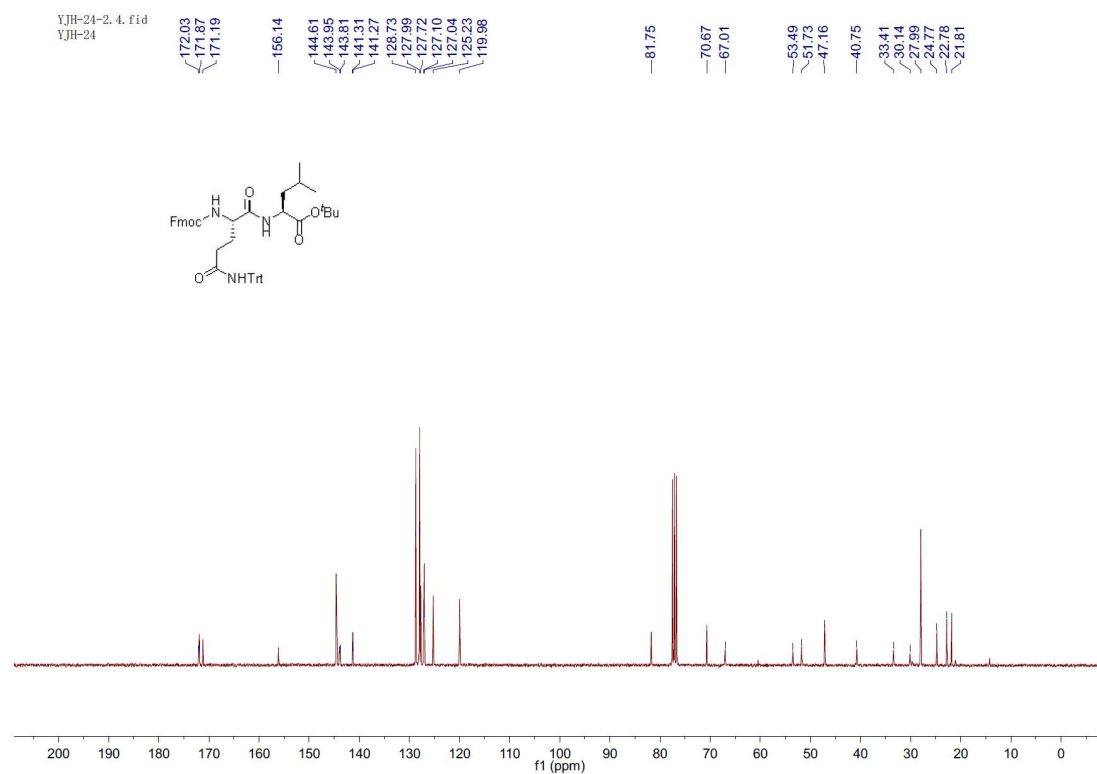

**Figure S65.**  $^{13}\text{C}$  NMR of compound **7s** in  $\text{CDCl}_3$ , 75 MHz for  $^{13}\text{C}$  NMR.

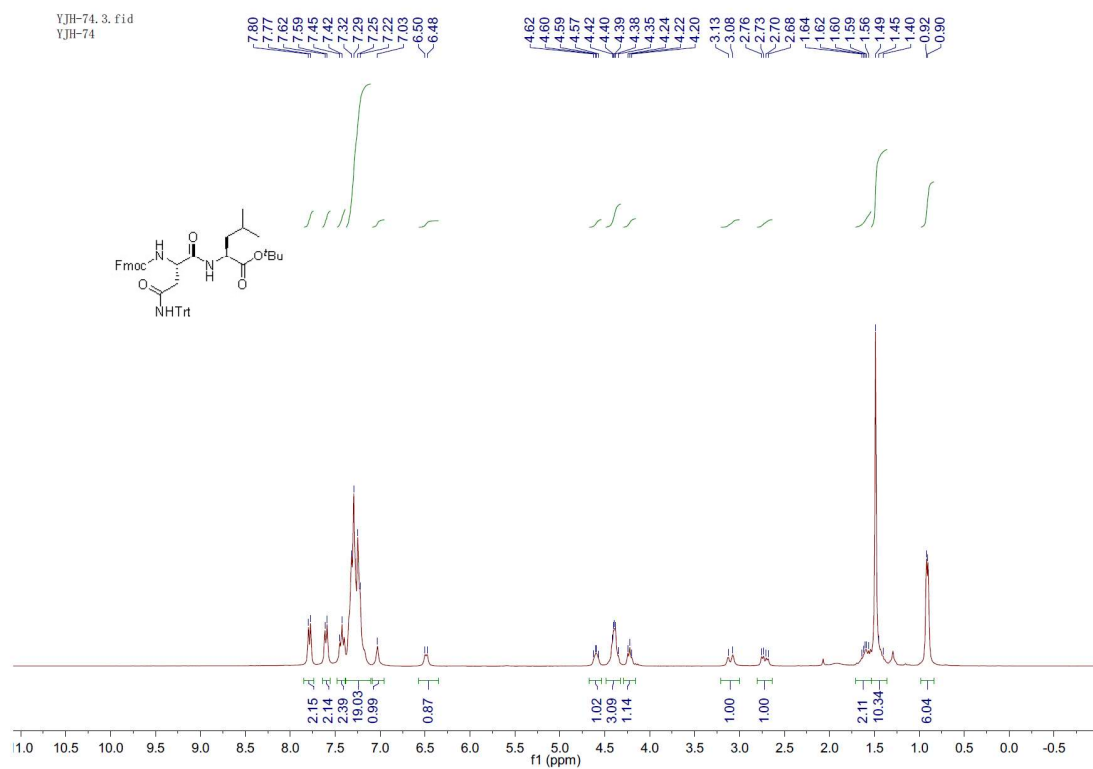

**Figure S66.**  $^1\text{H}$  NMR of compound **7t** in  $\text{CDCl}_3$ , 300 MHz for  $^1\text{H}$  NMR.

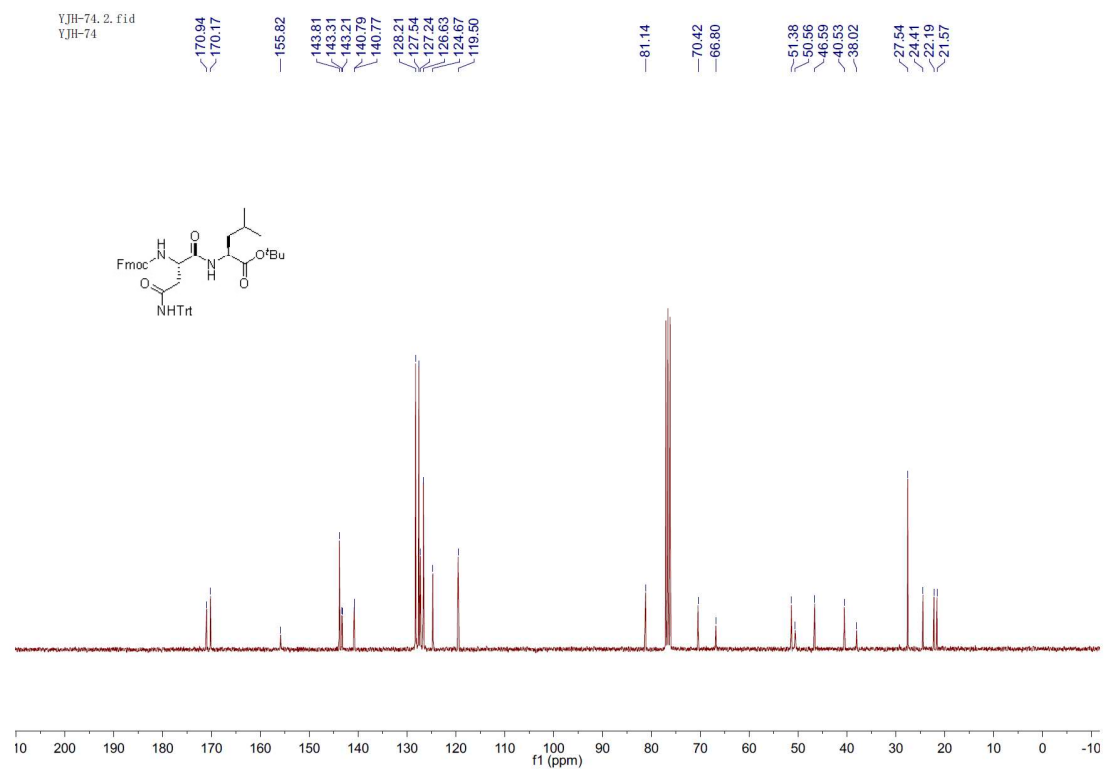

**Figure S67.**  $^{13}\text{C}$  NMR of compound **7t** in  $\text{CDCl}_3$ , 75 MHz for  $^{13}\text{C}$  NMR.

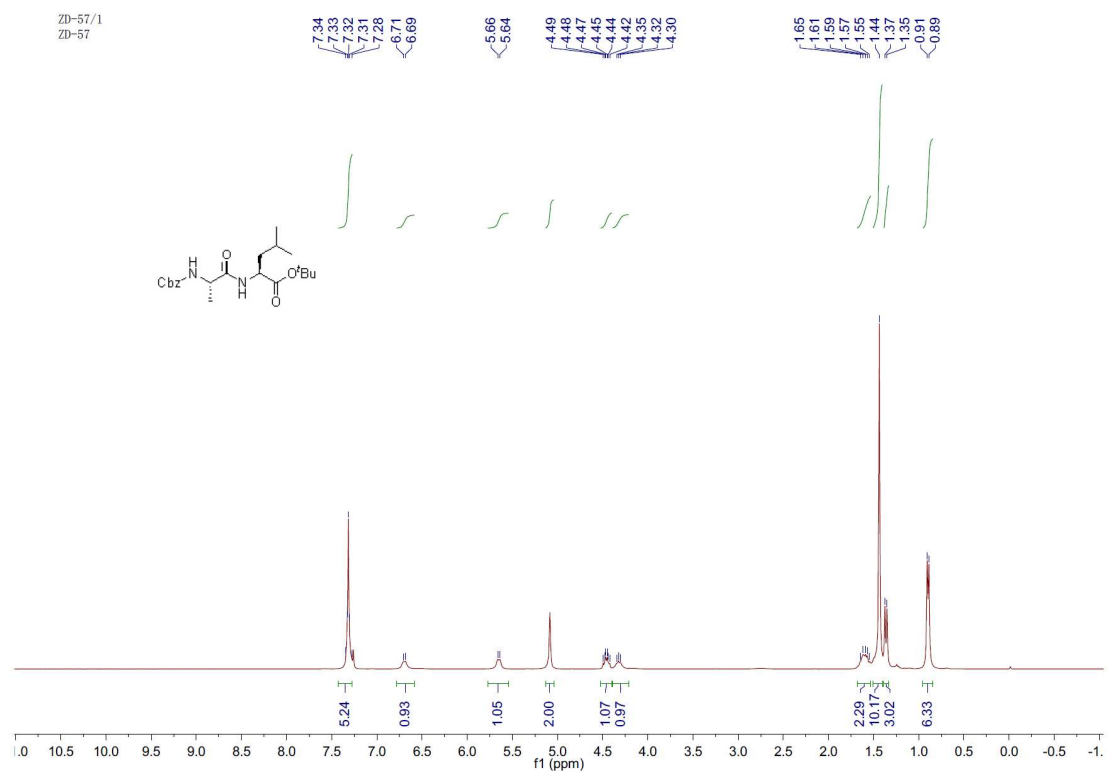

**Figure S68.**  $^1\text{H}$  NMR of compound **7u** in  $\text{CDCl}_3$ , 300 MHz for  $^1\text{H}$  NMR.

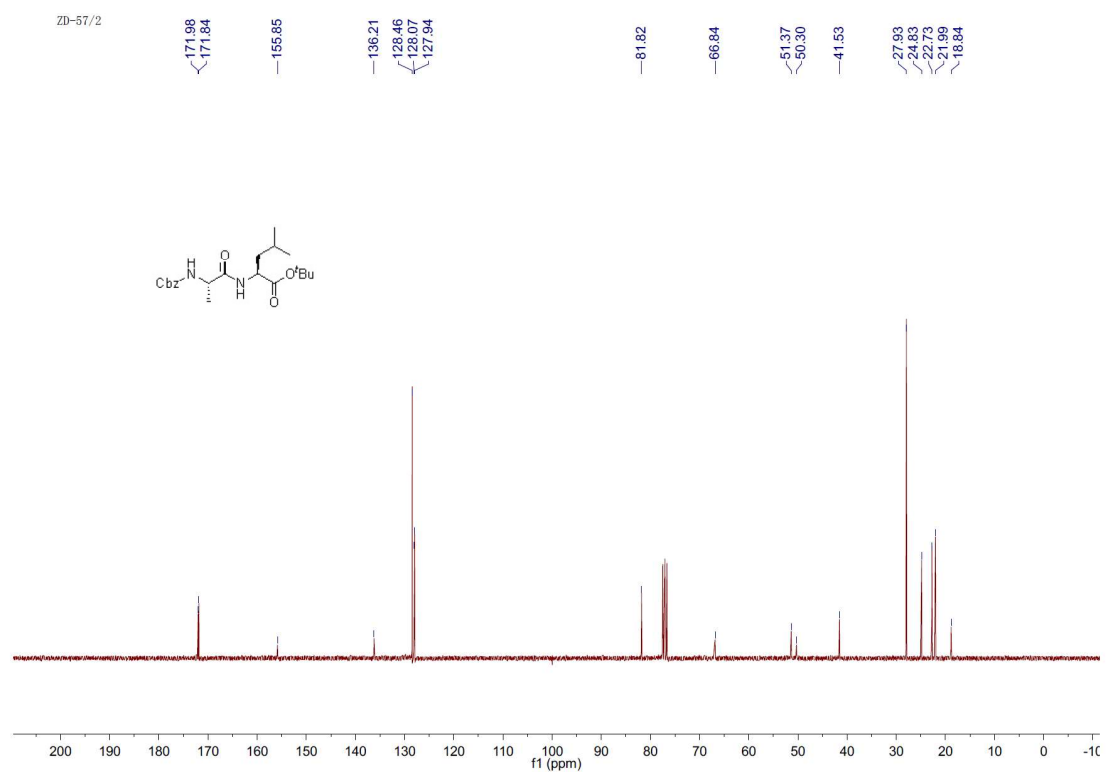

**Figure S69.**  $^{13}\text{C}$  NMR of compound **7u** in  $\text{CDCl}_3$ , 75 MHz for  $^{13}\text{C}$  NMR.



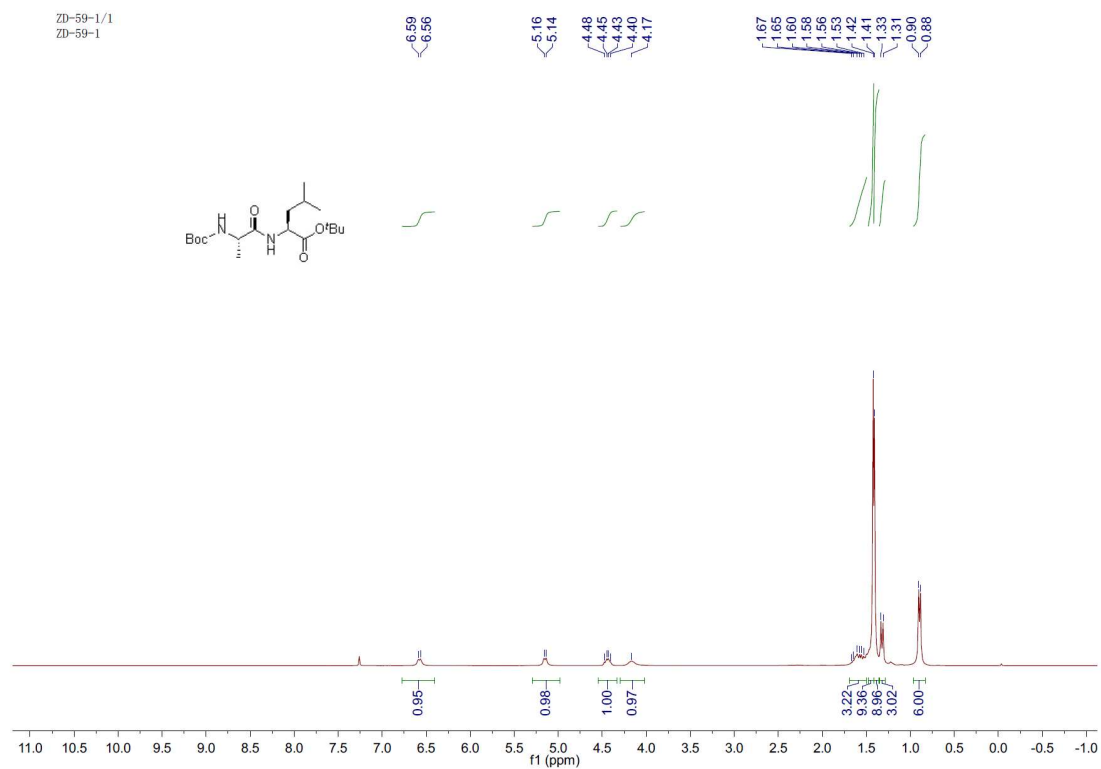

**Figure S70.**  $^1\text{H}$  NMR of compound **7v** in  $\text{CDCl}_3$ , 300 MHz for  $^1\text{H}$  NMR.

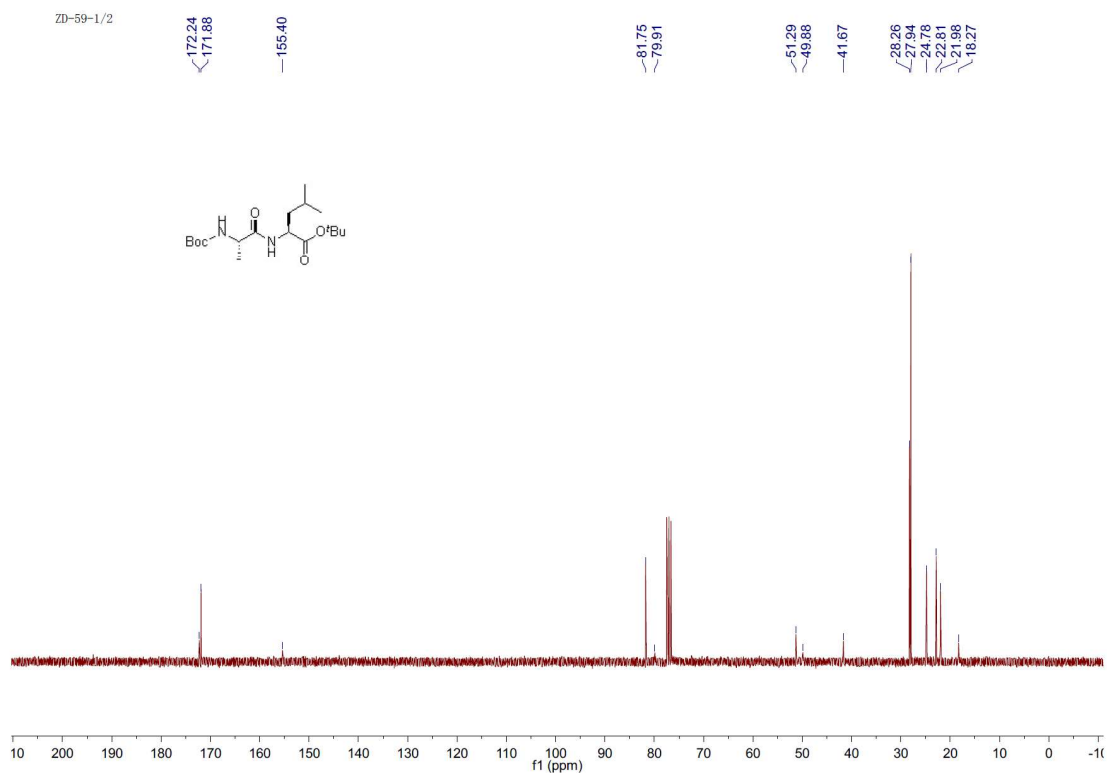

**Figure S71.**  $^{13}\text{C}$  NMR of compound **7v** in  $\text{CDCl}_3$ , 75 MHz for  $^{13}\text{C}$  NMR.

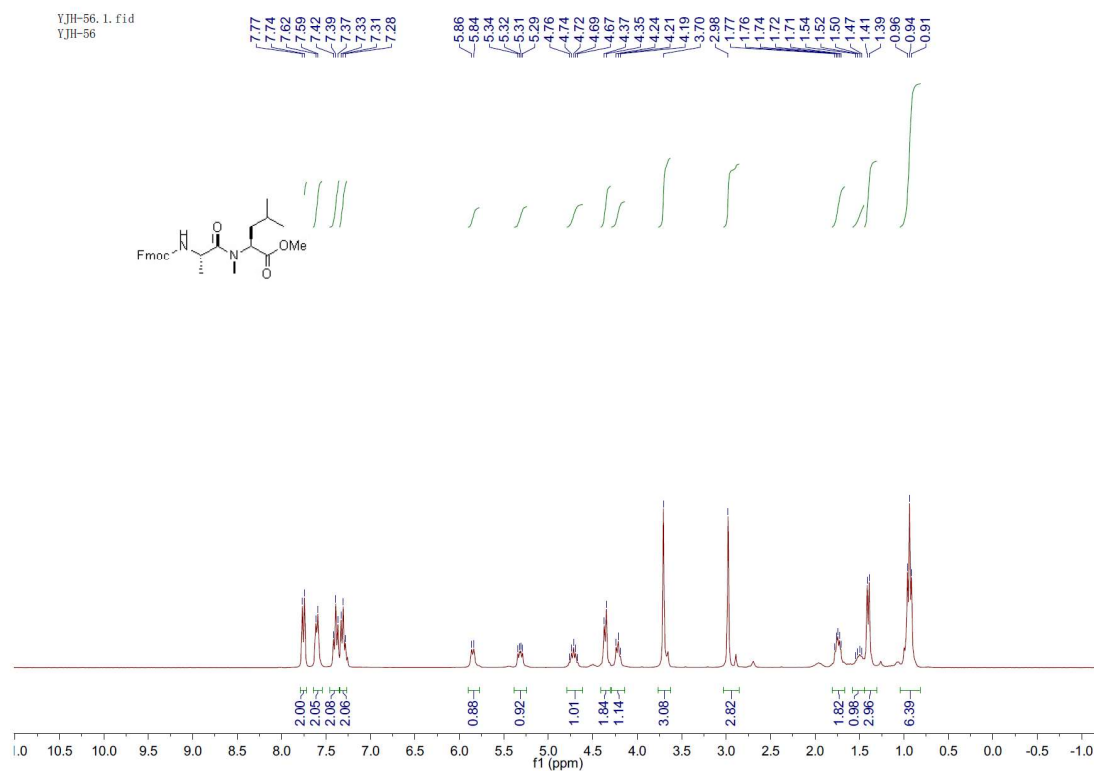

**Figure S72.**  $^1\text{H}$  NMR of compound **7w** in  $\text{CDCl}_3$ , 300 MHz for  $^1\text{H}$  NMR.

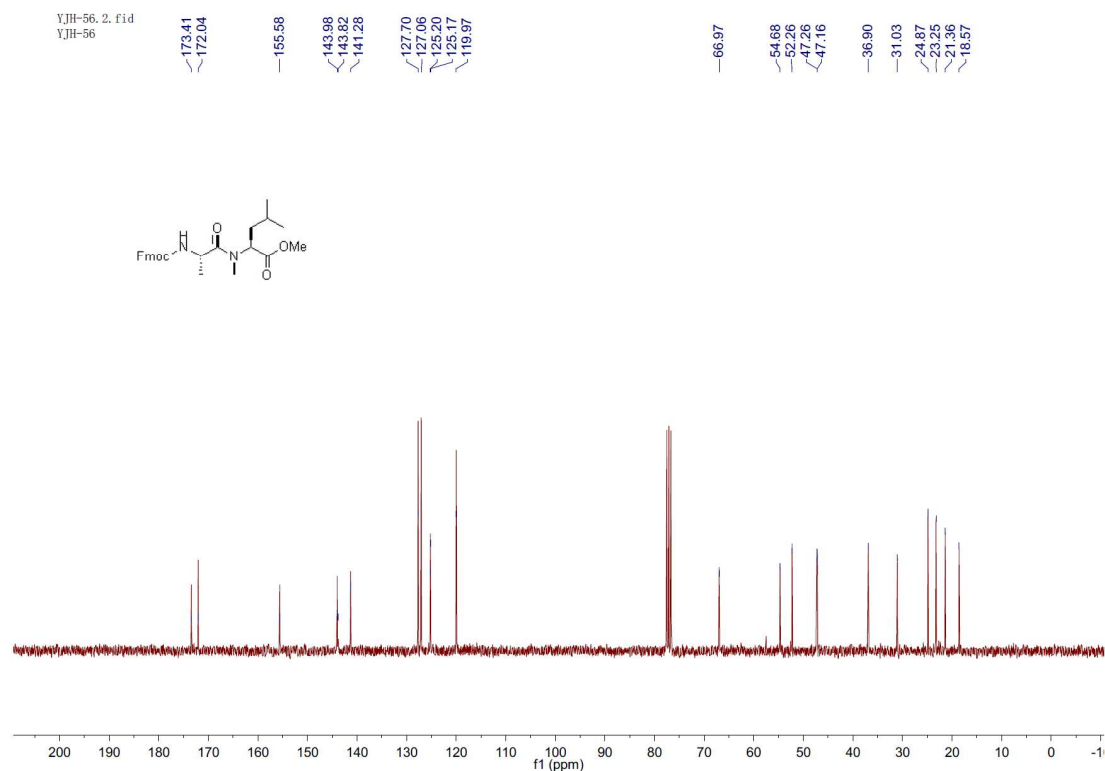

**Figure S73.**  $^{13}\text{C}$  NMR of compound **7w** in  $\text{CDCl}_3$ , 75 MHz for  $^{13}\text{C}$  NMR.

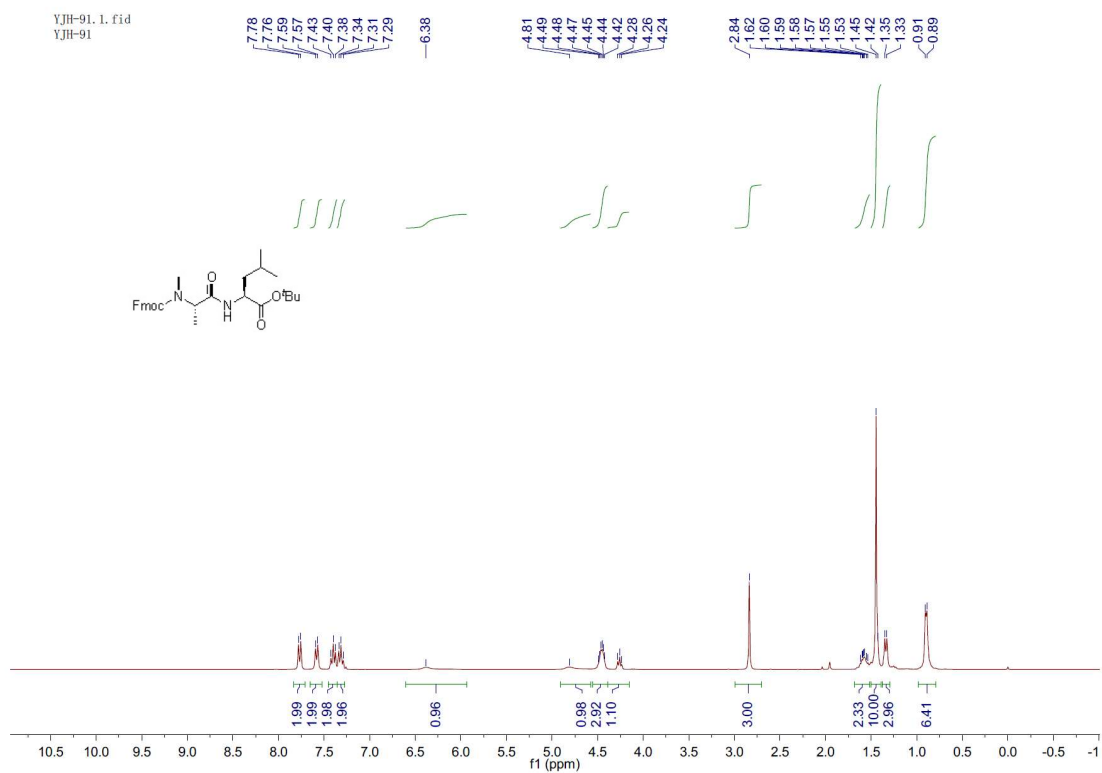

**Figure S74.**  $^1\text{H}$  NMR of compound **7x** in  $\text{CDCl}_3$ , 300 MHz for  $^1\text{H}$  NMR.

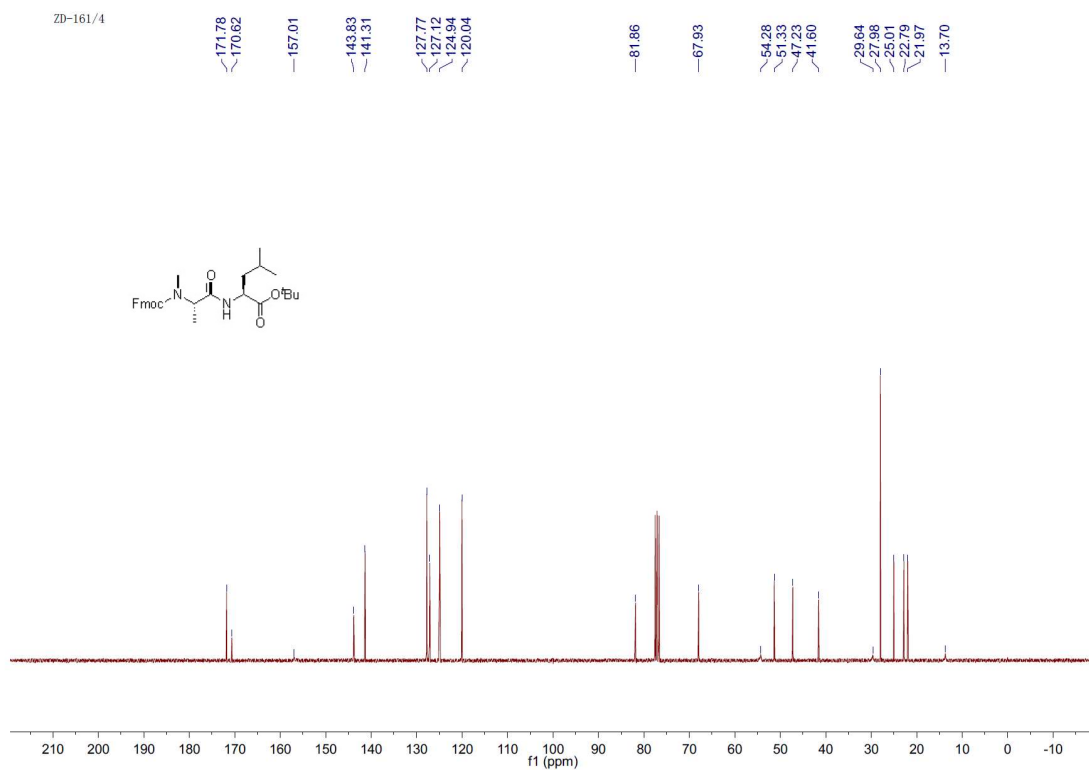

**Figure S75.**  $^{13}\text{C}$  NMR of compound **7x** in  $\text{CDCl}_3$ , 75 MHz for  $^{13}\text{C}$  NMR.

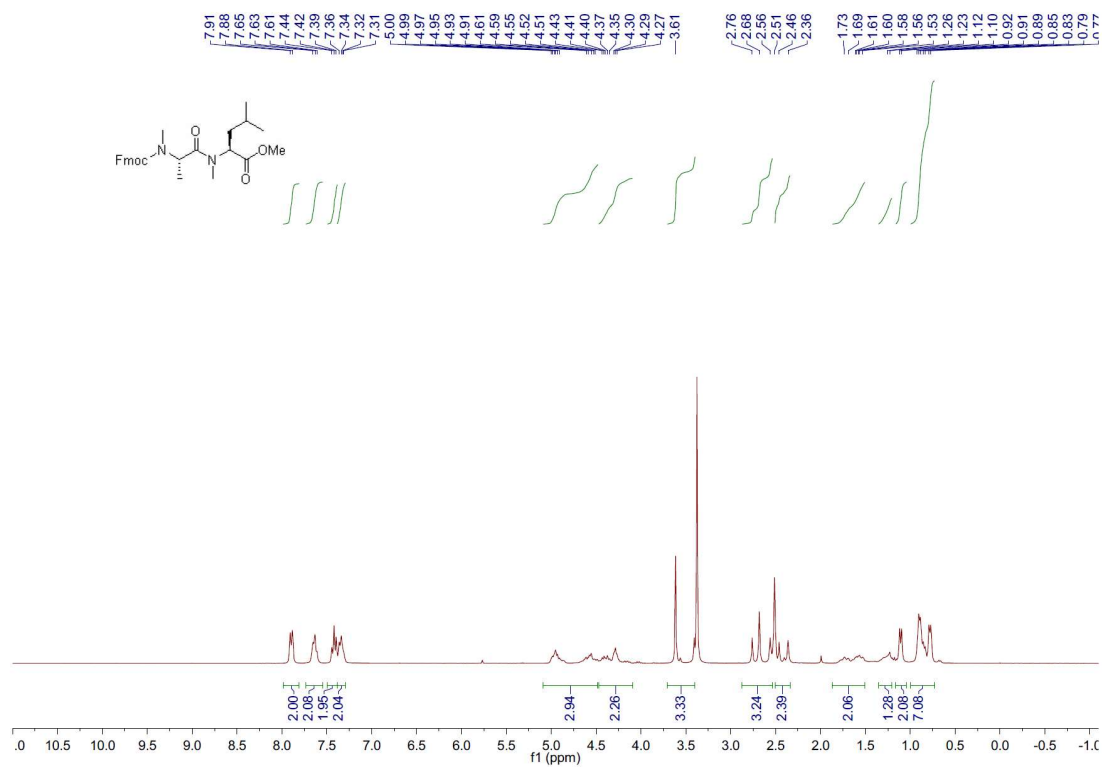

Figure S76. <sup>1</sup>H NMR of compound 7y in DMSO-*d*<sub>6</sub>, 300 MHz for <sup>1</sup>H NMR.

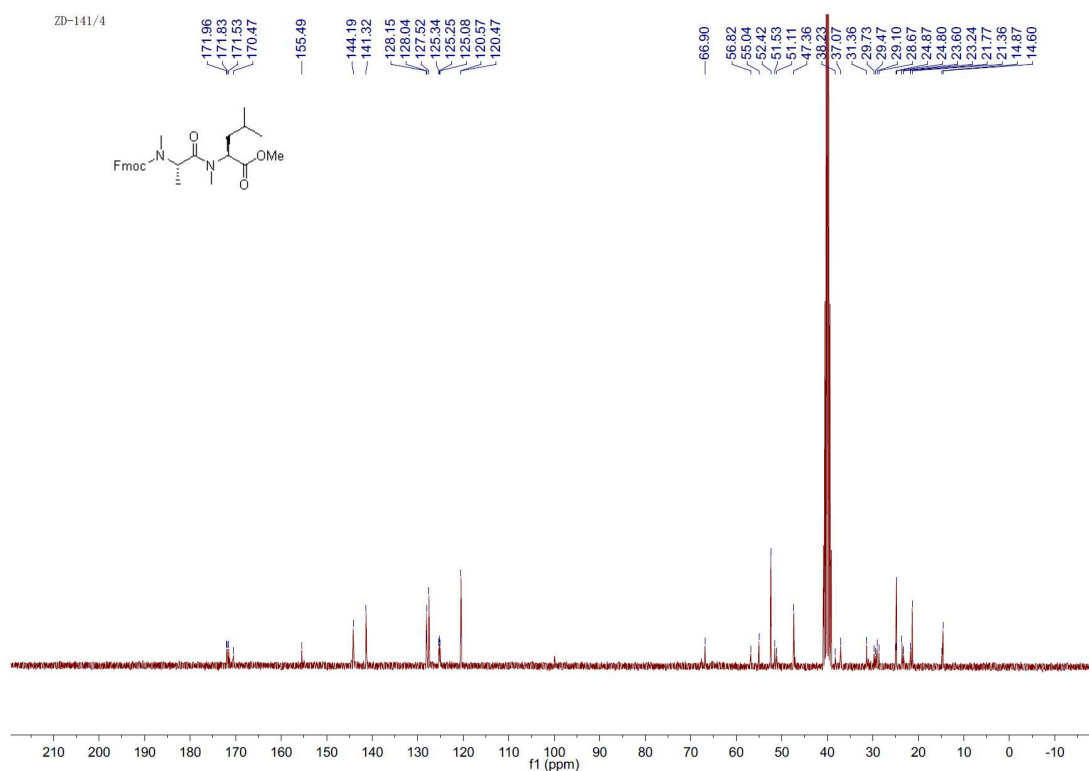

Figure S77. <sup>13</sup>C NMR of compound 7y in DMSO-*d*<sub>6</sub>, 75 MHz for <sup>13</sup>C NMR.

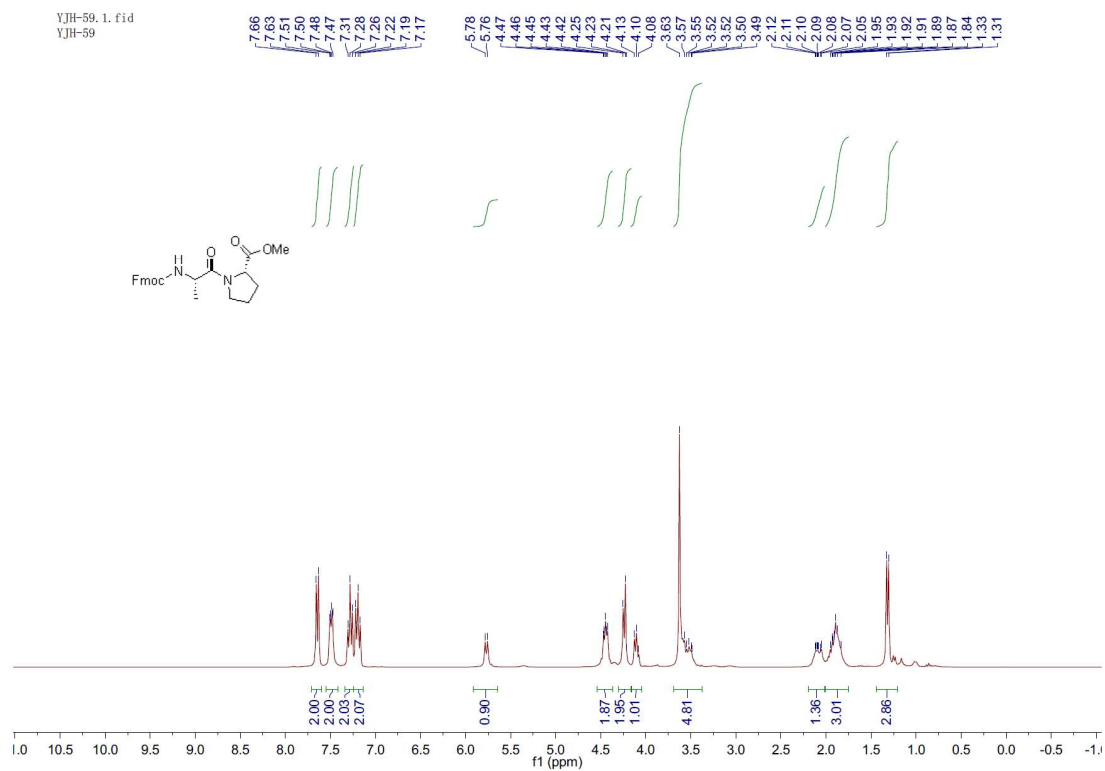

**Figure S78.**  $^1\text{H}$  NMR of compound **7z** in  $\text{CDCl}_3$ , 300 MHz for  $^1\text{H}$  NMR.

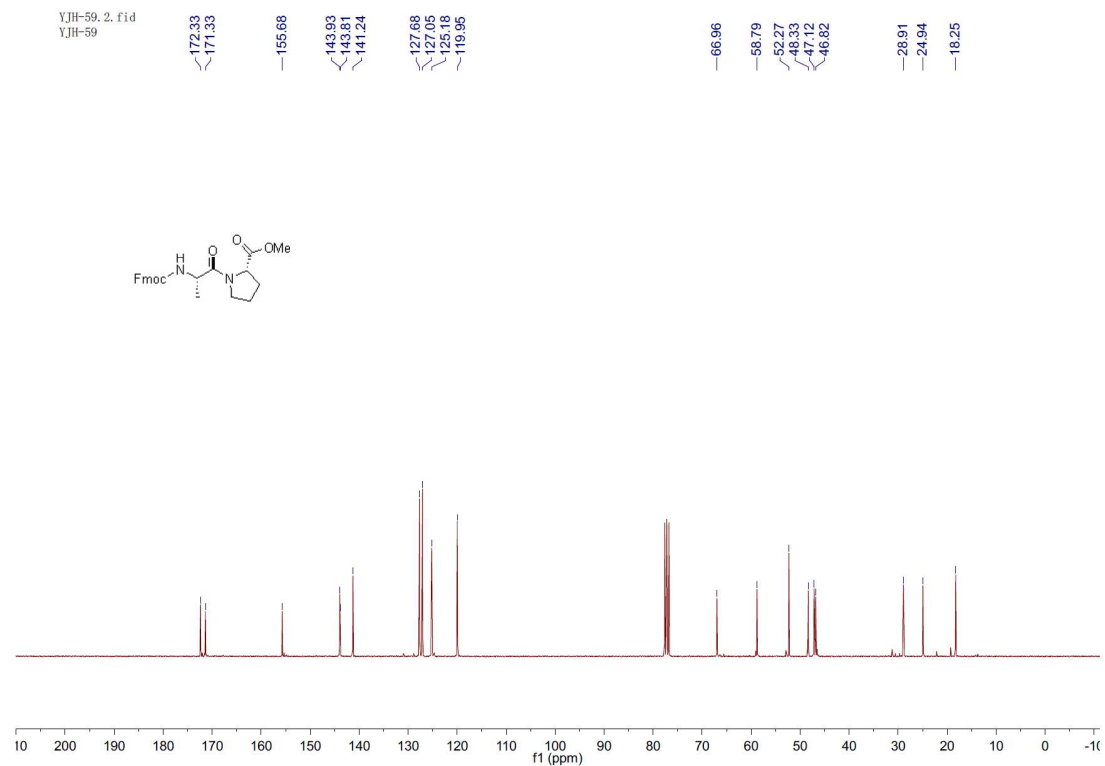

**Figure S79.**  $^{13}\text{C}$  NMR of compound **7z** in  $\text{CDCl}_3$ , 75 MHz for  $^{13}\text{C}$  NMR.

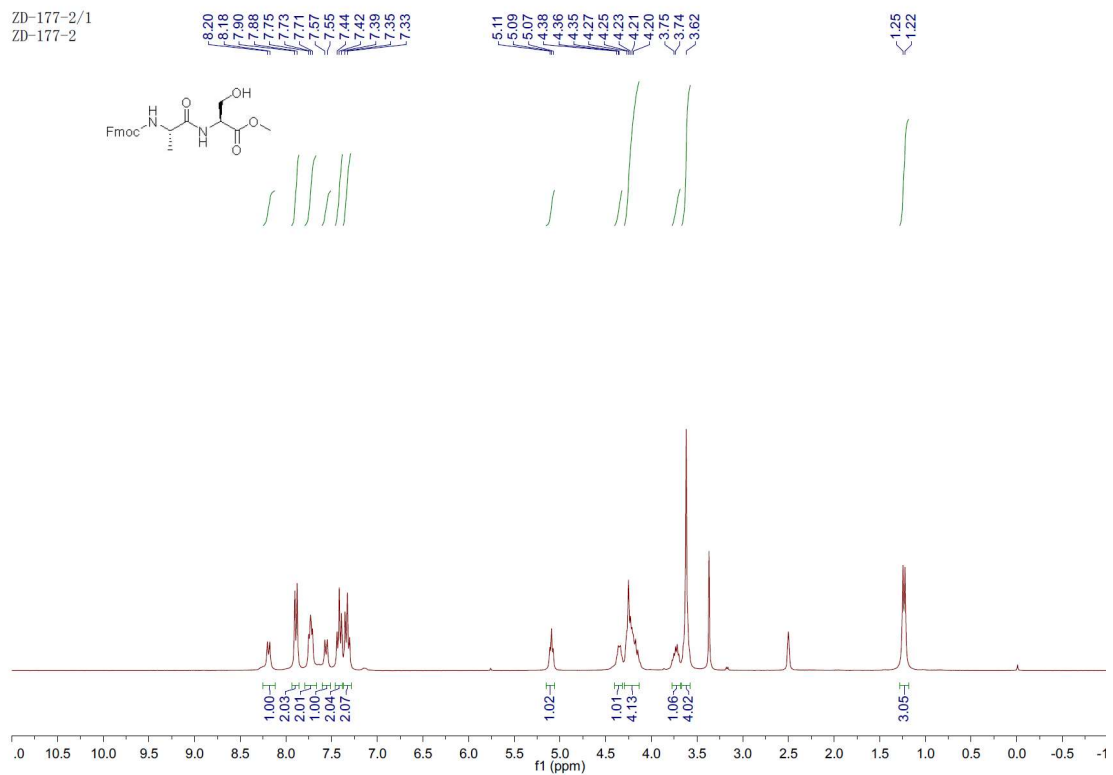

**Figure S80.**  $^1\text{H}$  NMR of compound **7aa** in  $\text{CDCl}_3$ , 300 MHz for  $^1\text{H}$  NMR.

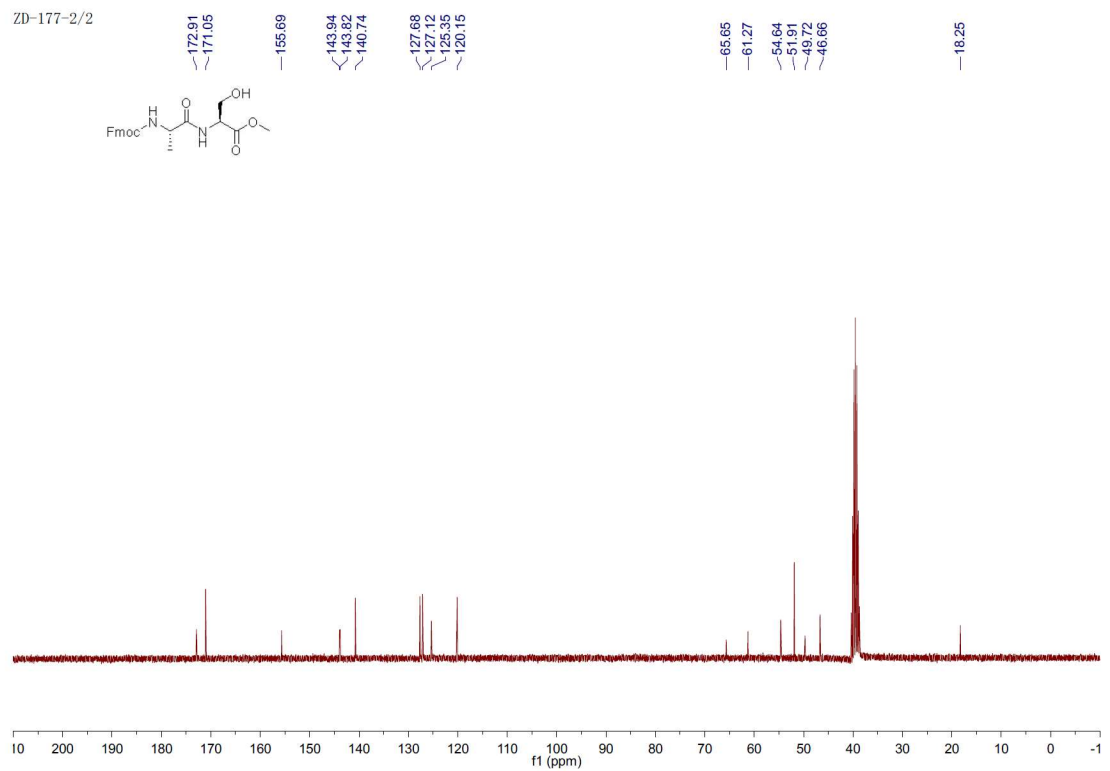

**Figure S81.**  $^{13}\text{C}$  NMR of compound **7aa** in  $\text{CDCl}_3$ , 75 MHz for  $^{13}\text{C}$  NMR.

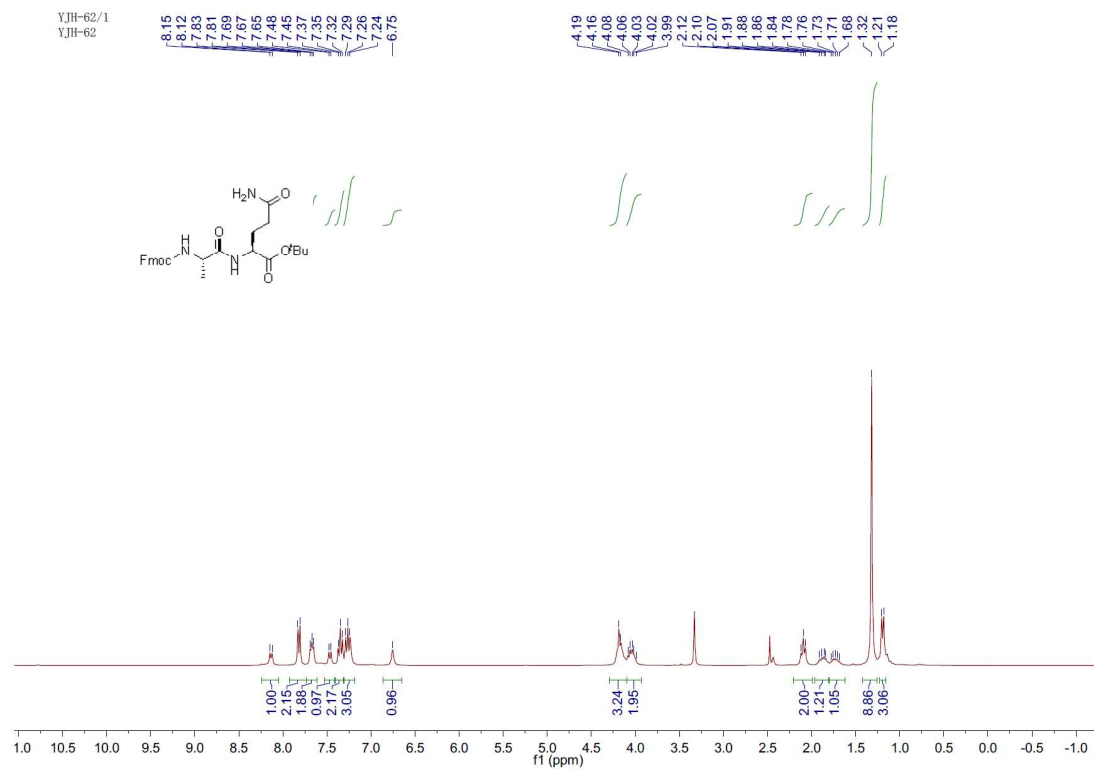

**Figure S82.**  $^1\text{H}$  NMR of compound **7ab** in  $\text{CDCl}_3$ , 300 MHz for  $^1\text{H}$  NMR.

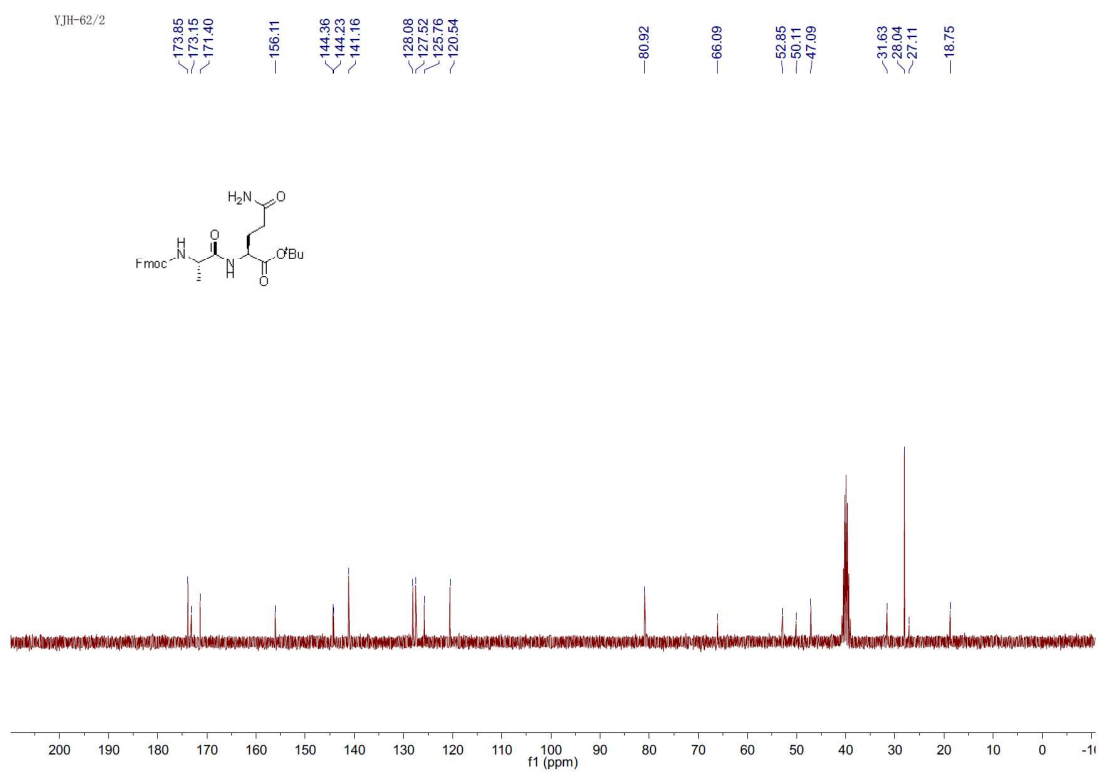

**Figure S83.**  $^{13}\text{C}$  NMR of compound **7ab** in  $\text{CDCl}_3$ , 75 MHz for  $^{13}\text{C}$  NMR.

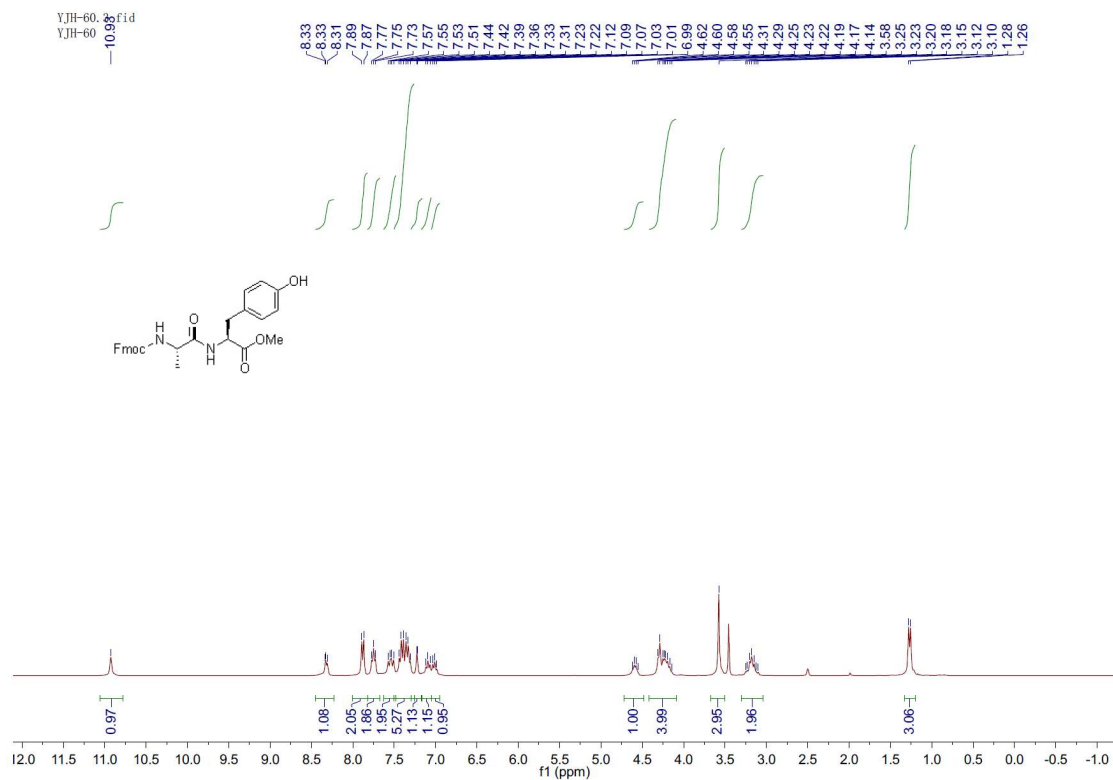

**Figure S84.**  $^1\text{H}$  NMR of compound **7ac** in  $\text{DMSO-}d_6$ , 300 MHz for  $^1\text{H}$  NMR.

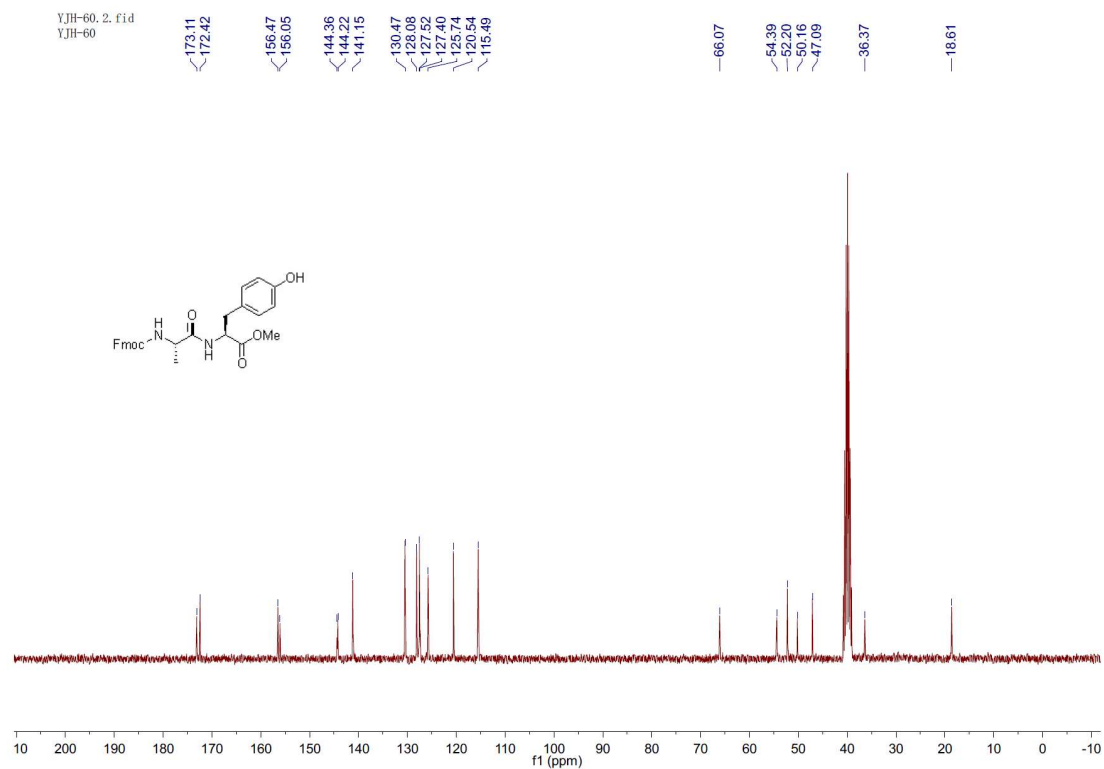

**Figure S85.**  $^{13}\text{C}$  NMR of compound **7ac** in  $\text{DMSO-}d_6$ , 75 MHz for  $^{13}\text{C}$  NMR.



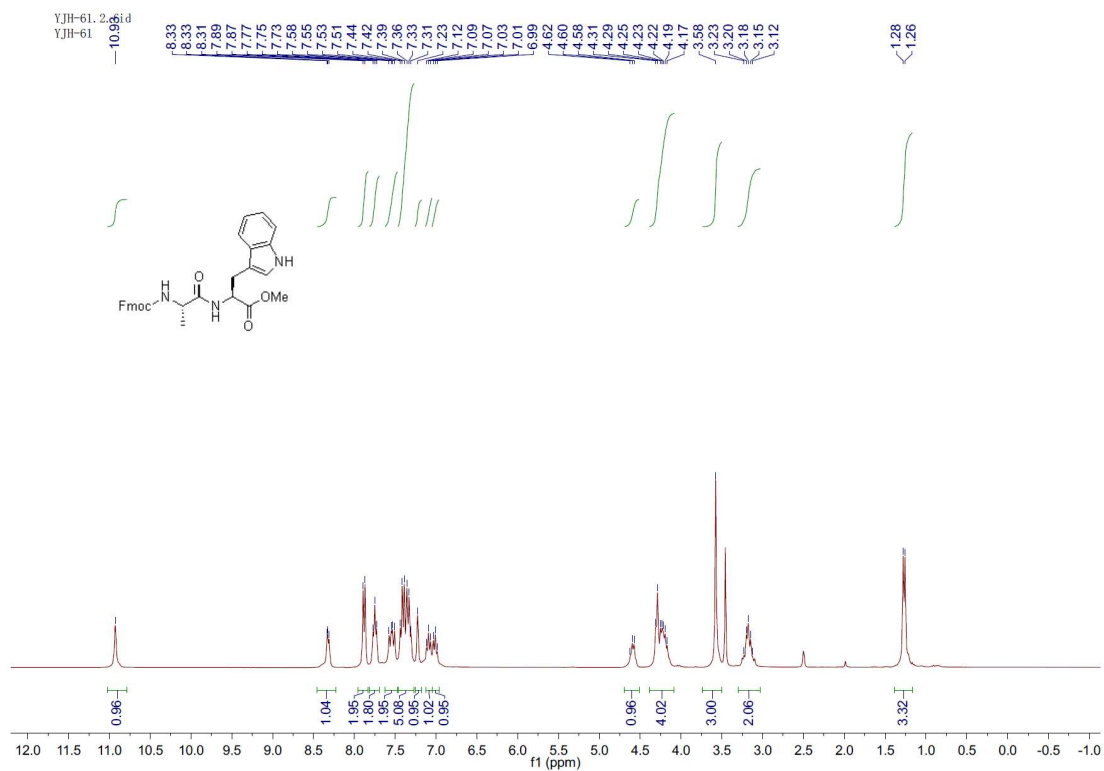

**Figure S86.**  $^1\text{H}$  NMR of compound **7ad** in  $\text{DMSO-}d_6$ , 300 MHz for  $^1\text{H}$  NMR.

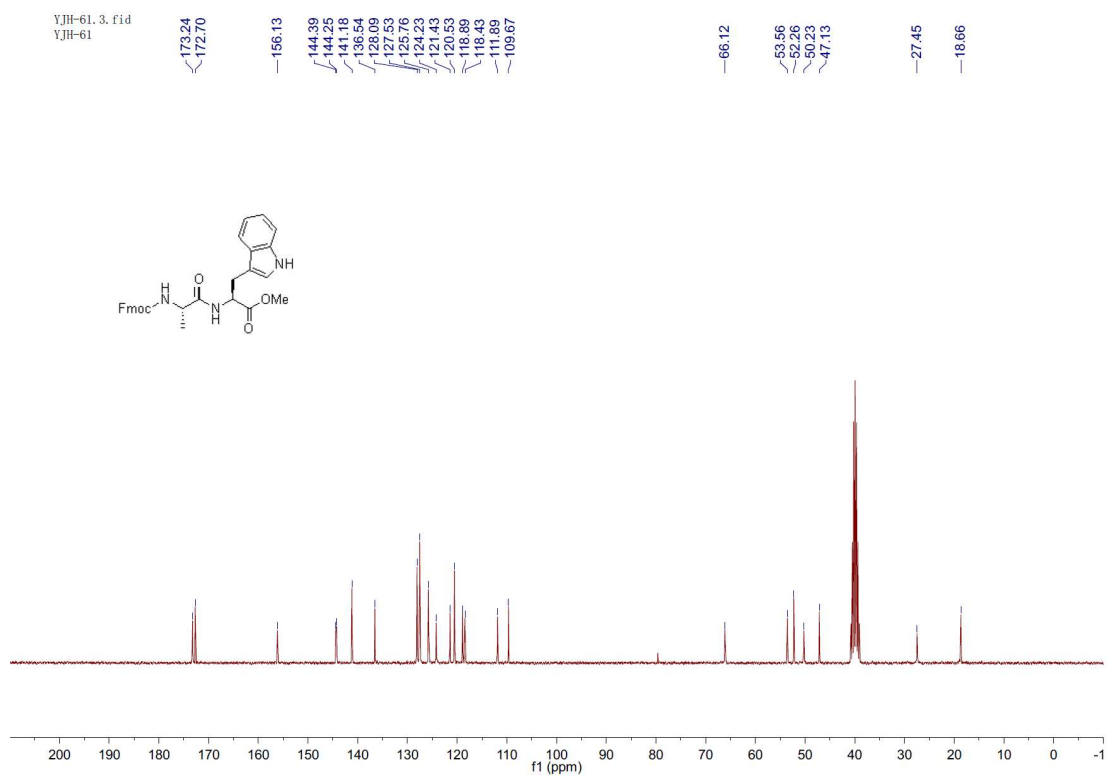

**Figure S87.**  $^{13}\text{C}$  NMR of compound **7ad** in  $\text{DMSO-}d_6$ , 75 MHz for  $^{13}\text{C}$  NMR.

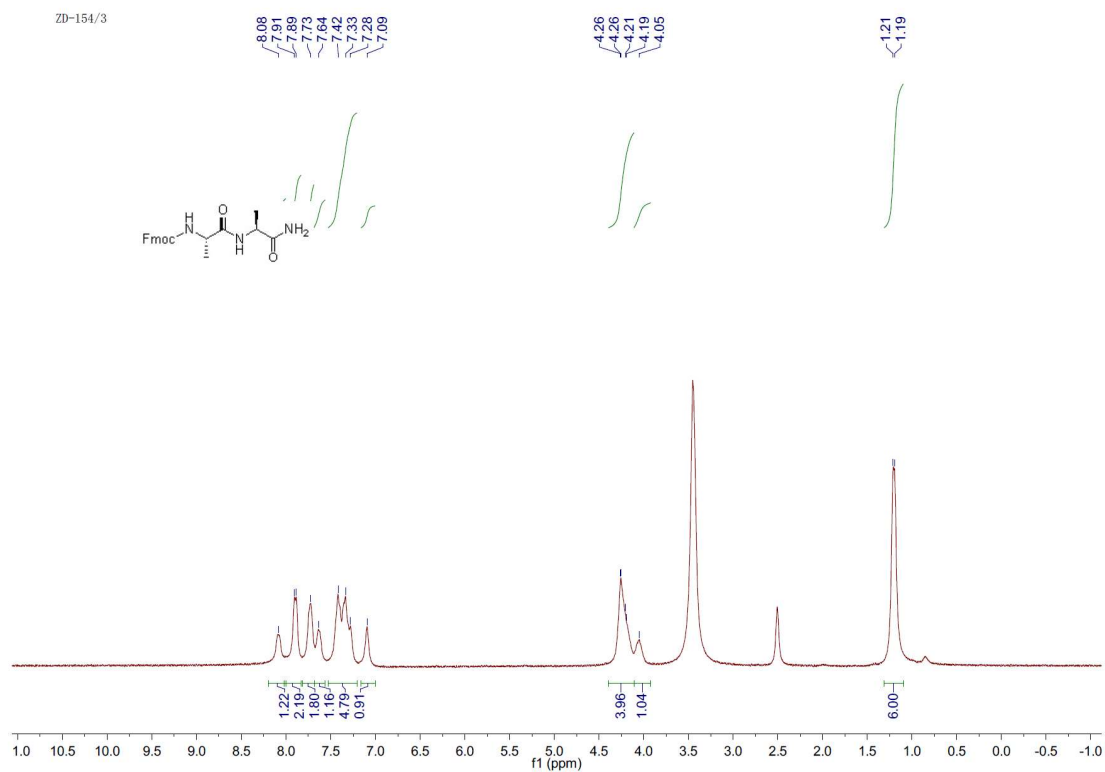

**Figure S88.**  $^1\text{H}$  NMR of compound **7ae** in  $\text{DMSO-}d_6$ , 300 MHz for  $^1\text{H}$  NMR.

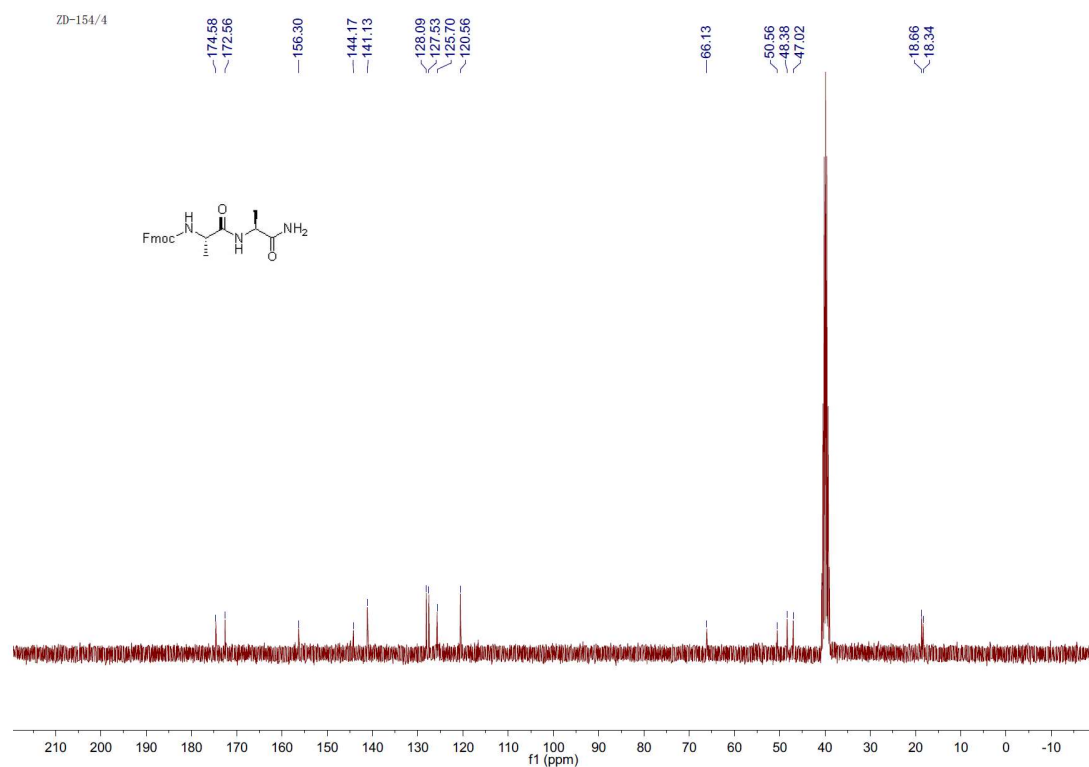

**Figure S89.**  $^{13}\text{C}$  NMR of compound **7ae** in  $\text{DMSO-}d_6$ , 75 MHz for  $^{13}\text{C}$  NMR.

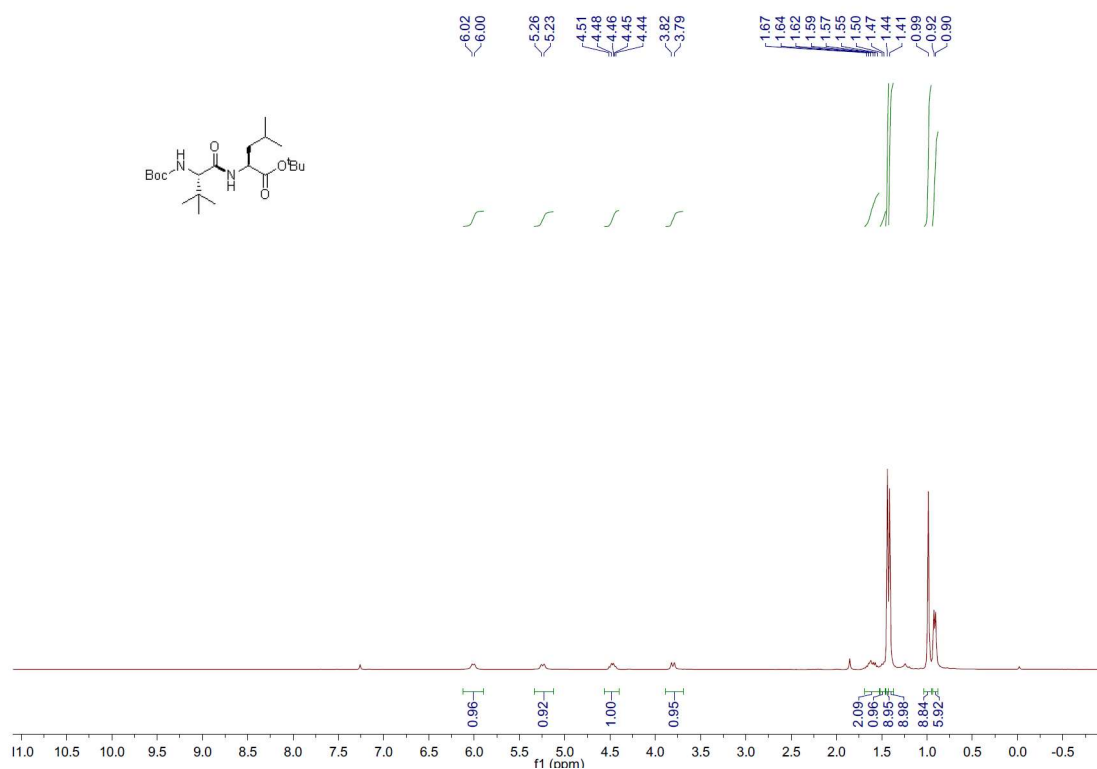

**Figure S90.**  $^1\text{H}$  NMR of compound **7af** in  $\text{CDCl}_3$ , 300 MHz for  $^1\text{H}$  NMR.

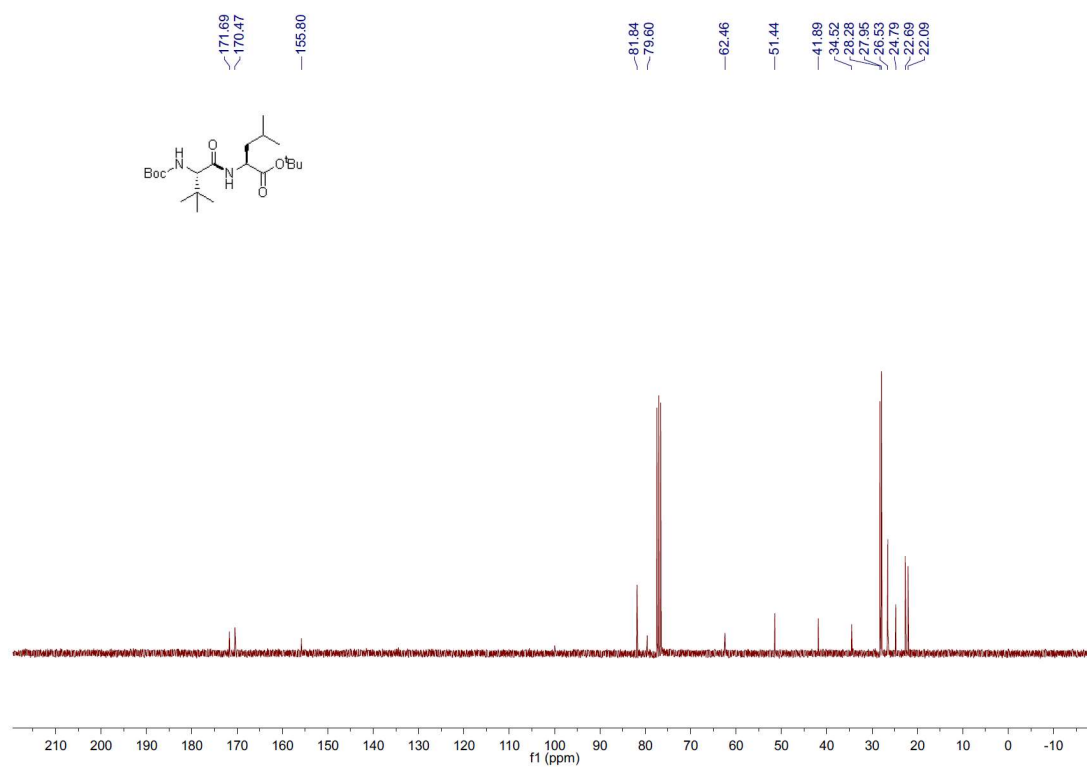

**Figure S91.**  $^{13}\text{C}$  NMR of compound **7af** in  $\text{CDCl}_3$ , 75 MHz for  $^{13}\text{C}$  NMR.

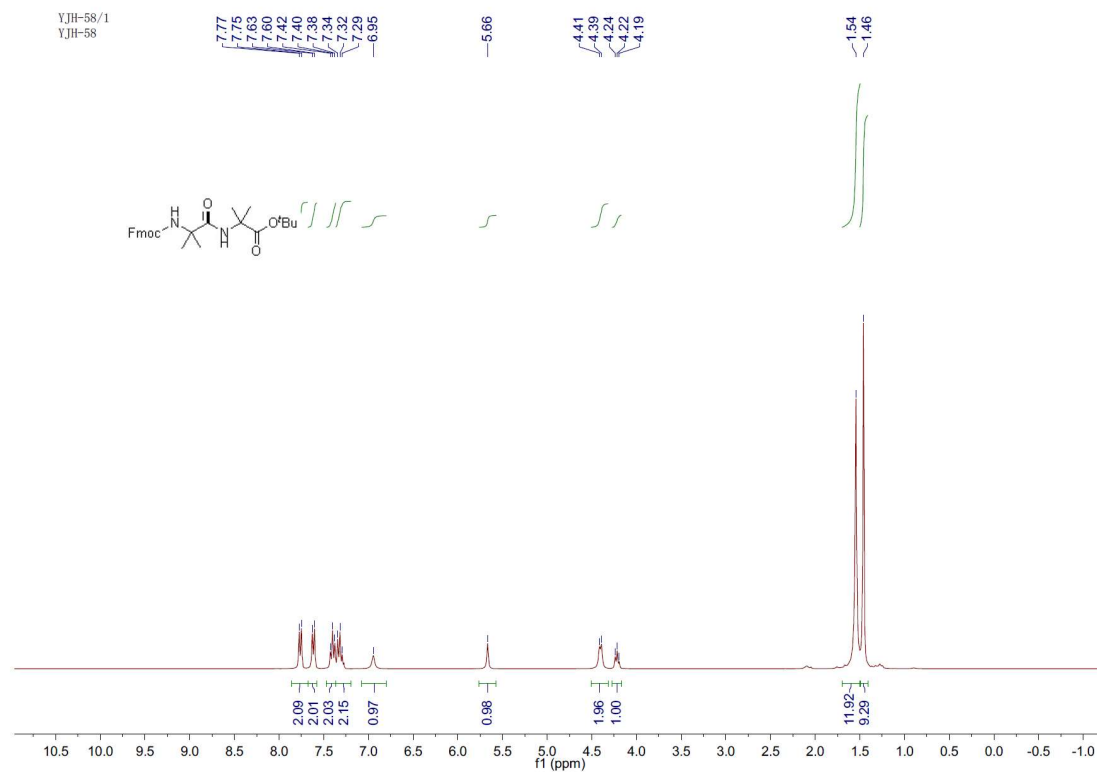

**Figure S92.**  $^1\text{H}$  NMR of compound **7ag** in  $\text{CDCl}_3$ , 300 MHz for  $^1\text{H}$  NMR.

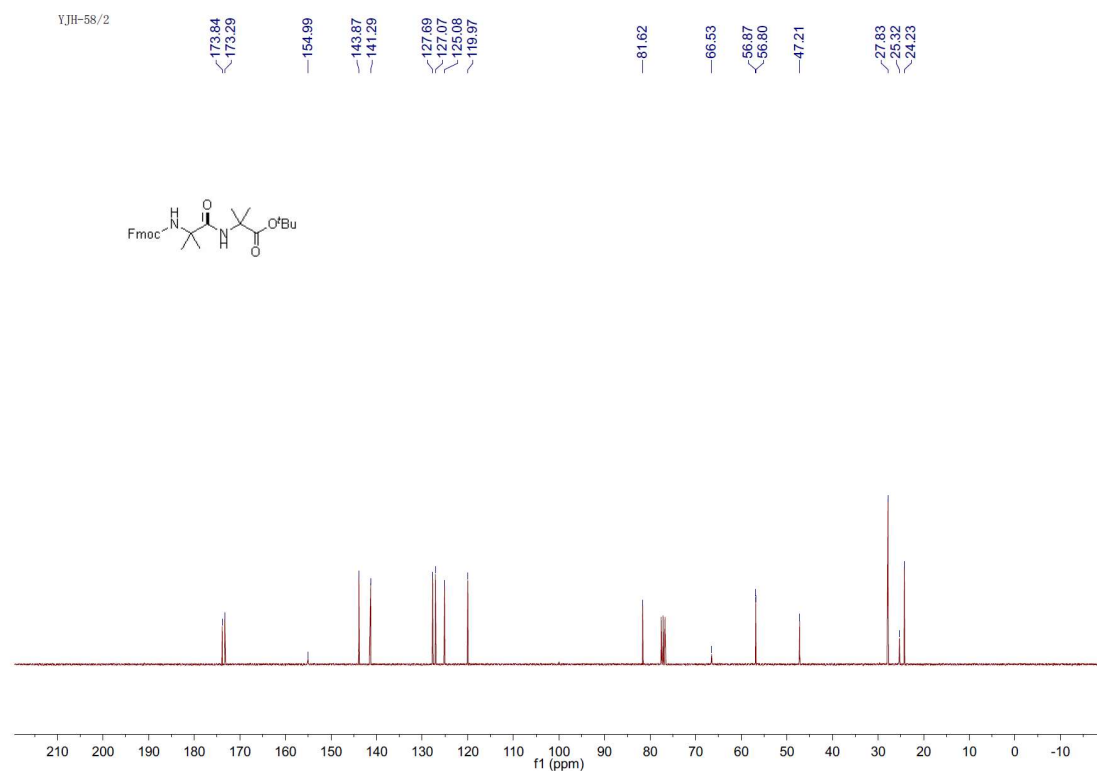

**Figure S93.**  $^{13}\text{C}$  NMR of compound **7ag** in  $\text{CDCl}_3$ , 75 MHz for  $^{13}\text{C}$  NMR.

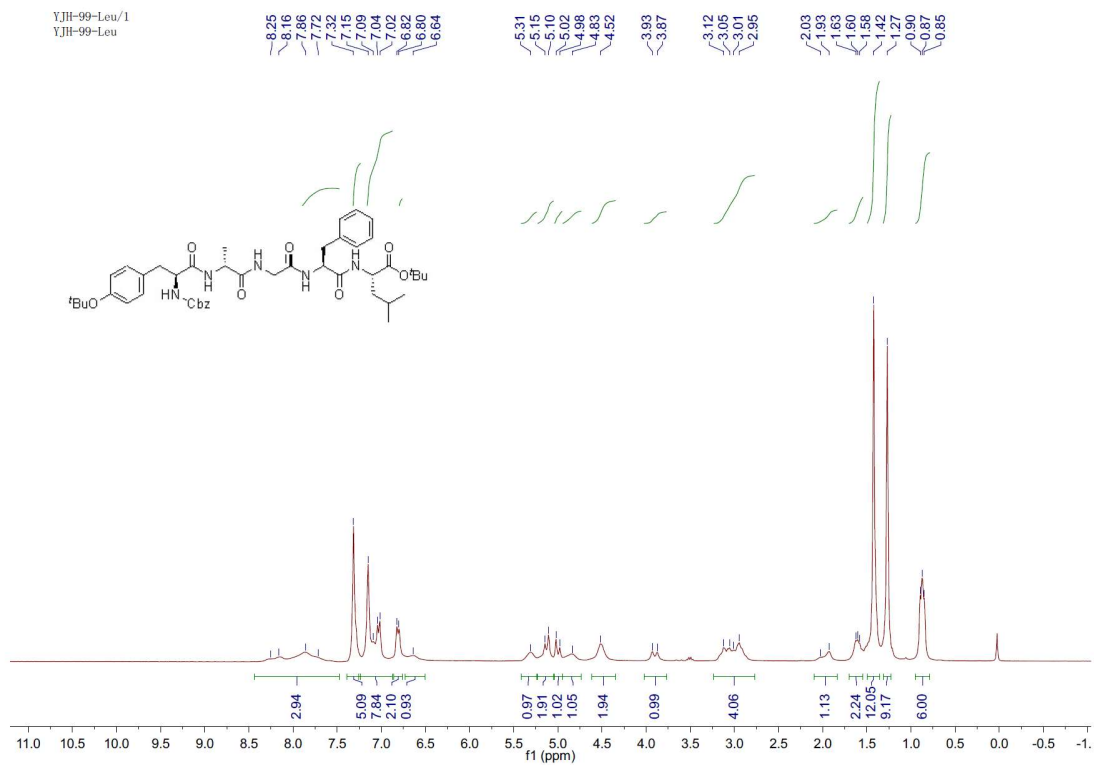

**Figure S94.**  $^1\text{H}$  NMR of compound **7ah** in  $\text{CDCl}_3$ , 300 MHz for  $^1\text{H}$  NMR.

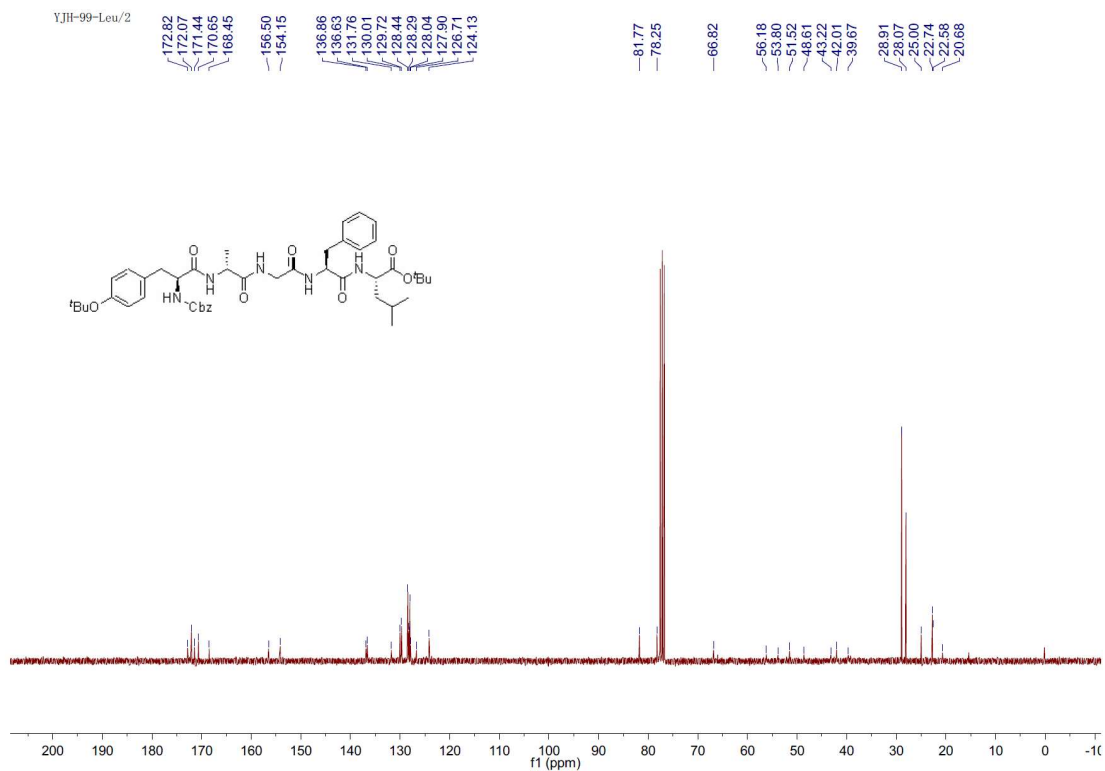

**Figure S95.**  $^{13}\text{C}$  NMR of compound **7ah** in  $\text{CDCl}_3$ , 75 MHz for  $^{13}\text{C}$  NMR.

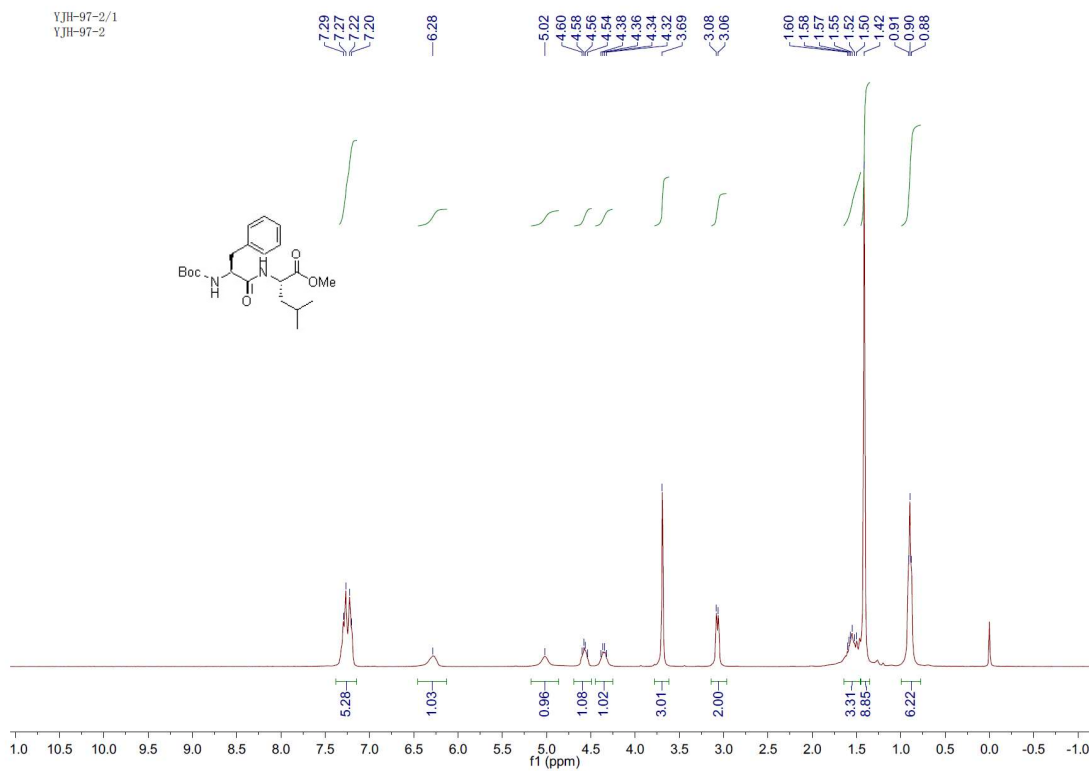

**Figure S96.**  $^1\text{H}$  NMR of compound **8** in  $\text{CDCl}_3$ , 300 MHz for  $^1\text{H}$  NMR.

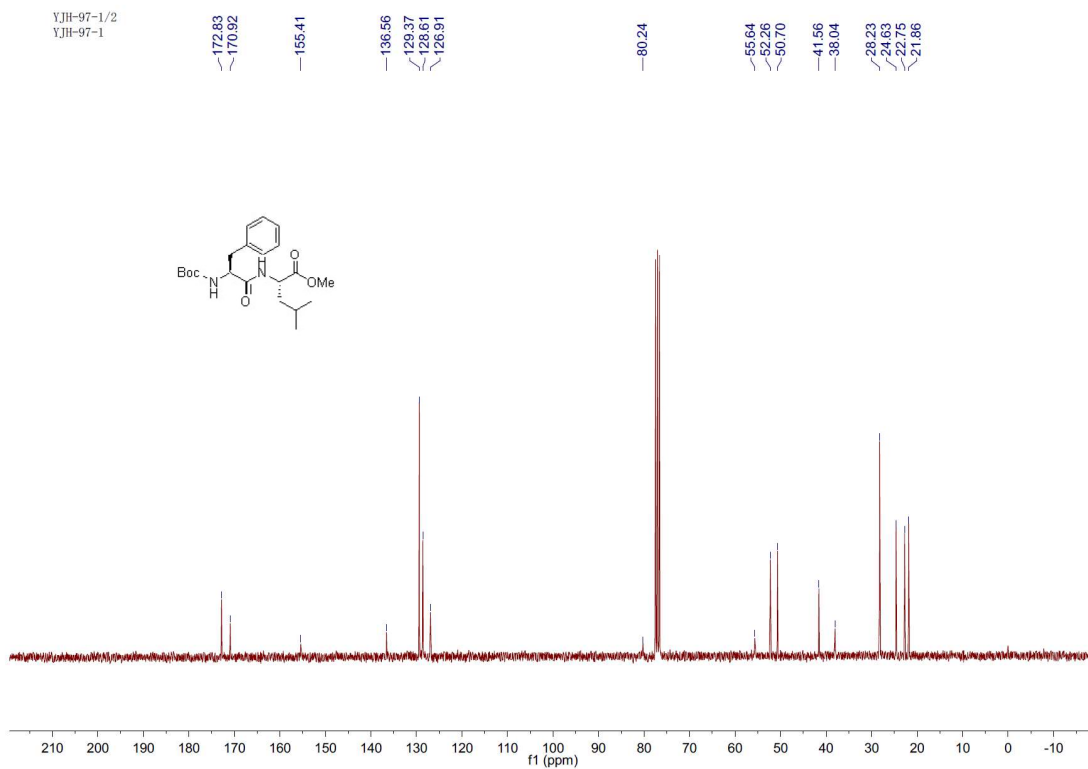

**Figure S97.**  $^{13}\text{C}$  NMR of compound **8** in  $\text{CDCl}_3$ , 75 MHz for  $^{13}\text{C}$  NMR.

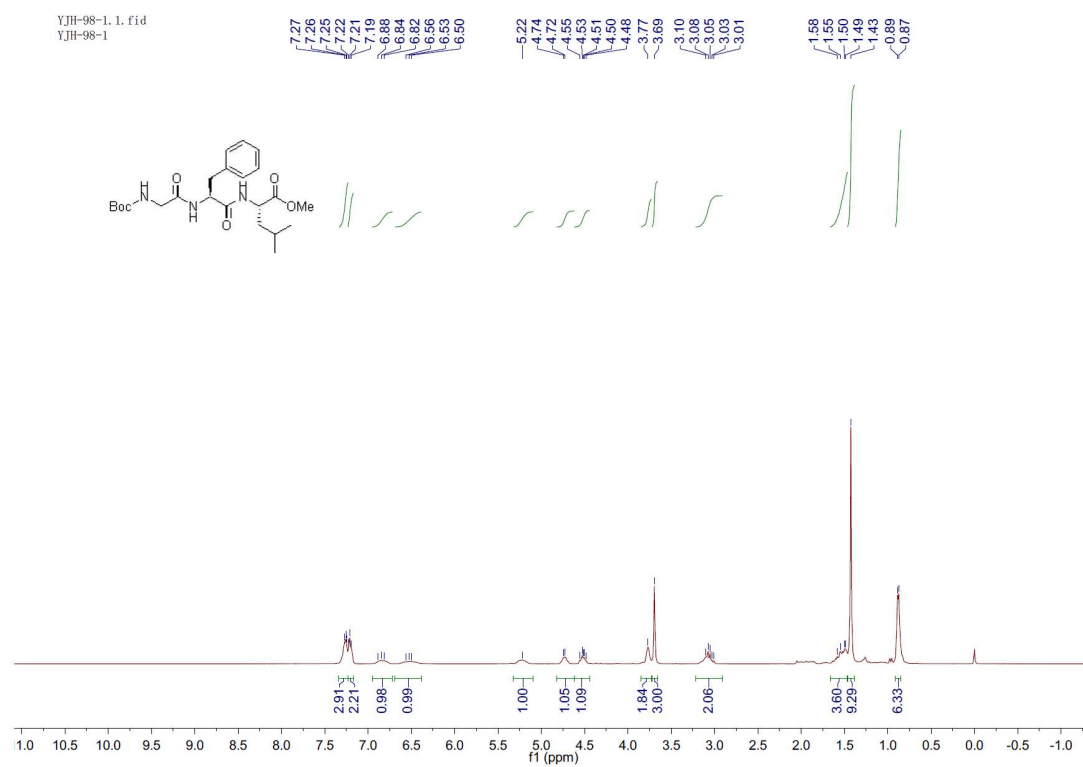

**Figure S98.**  $^1\text{H}$  NMR of compound **10** in  $\text{CDCl}_3$ , 300 MHz for  $^1\text{H}$  NMR.

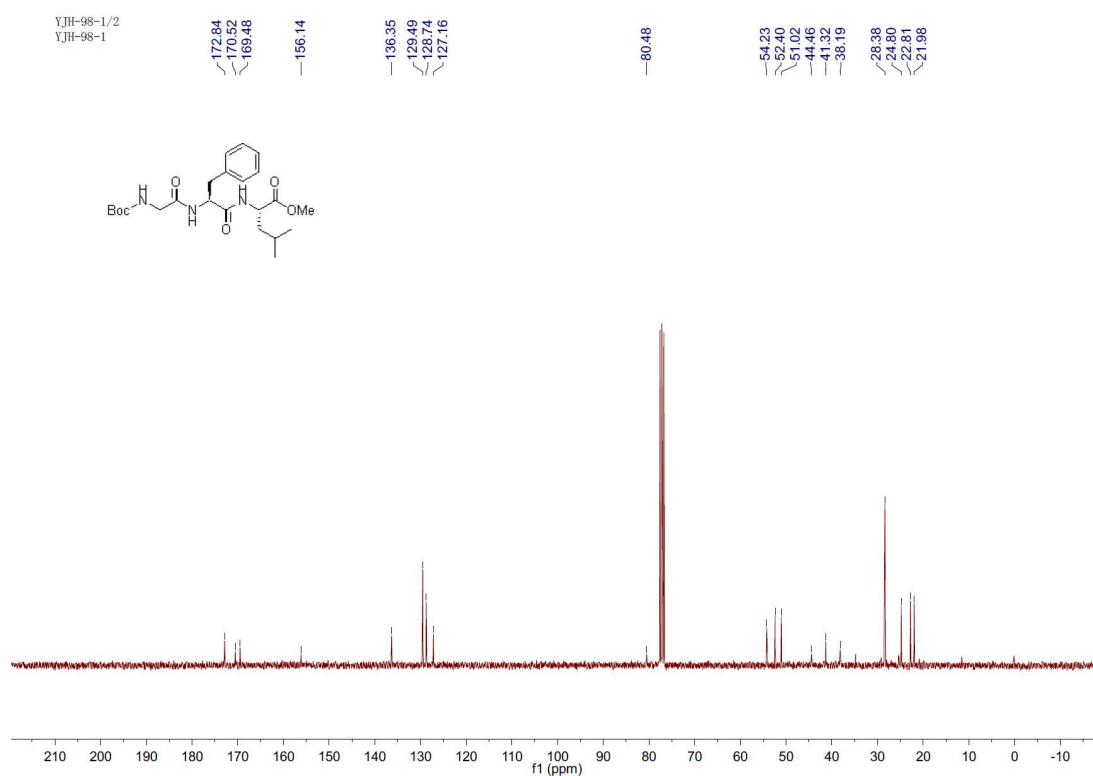

**Figure S99.**  $^{13}\text{C}$  NMR of compound **10** in  $\text{CDCl}_3$ , 75 MHz for  $^{13}\text{C}$  NMR.

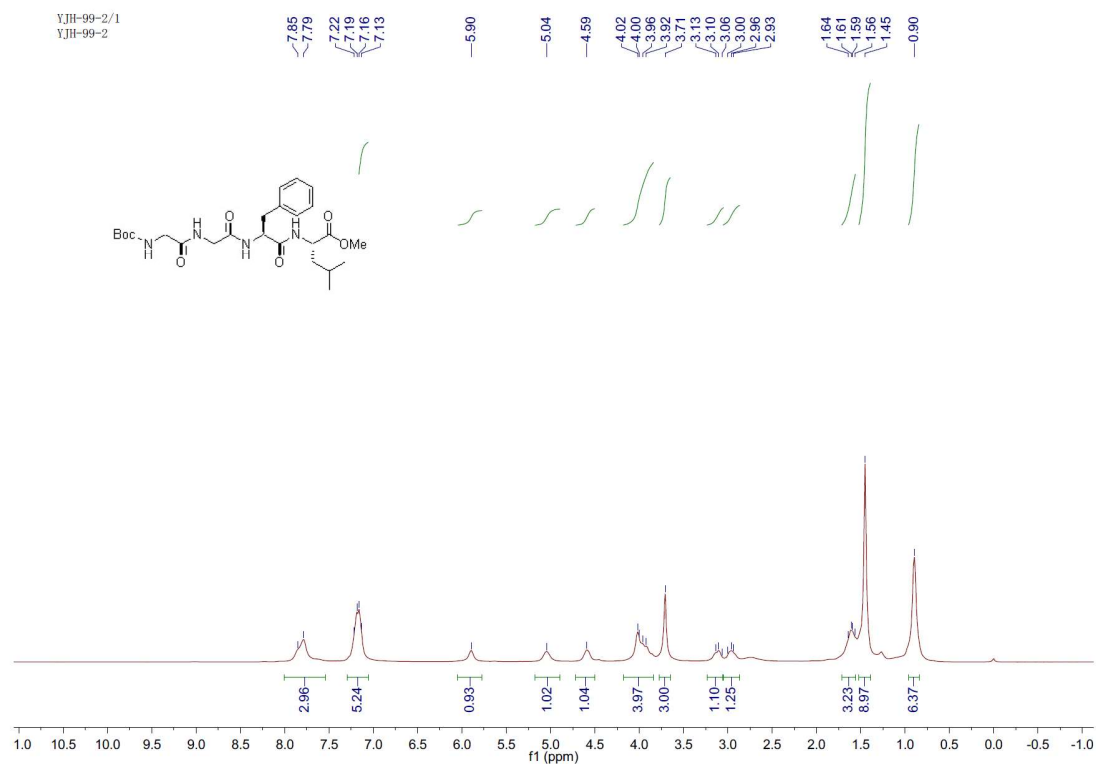

**Figure S100.**  $^1\text{H}$  NMR of compound **12** in  $\text{CDCl}_3$ , 300 MHz for  $^1\text{H}$  NMR.

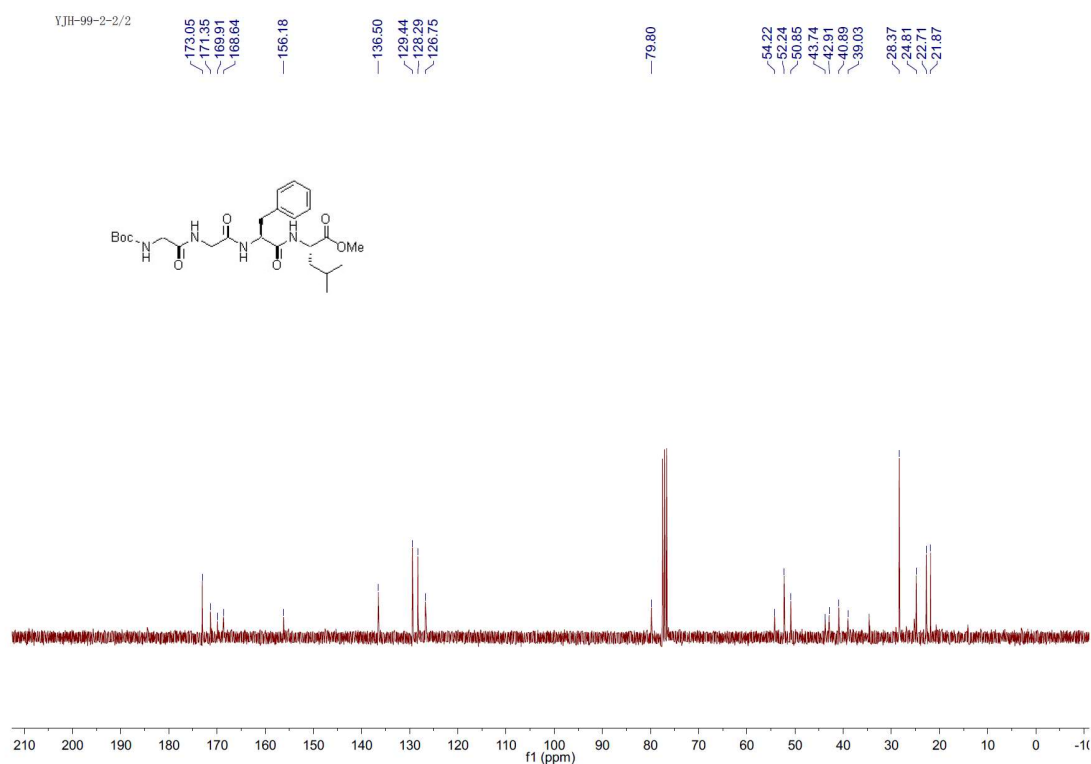

**Figure S101.**  $^{13}\text{C}$  NMR of compound **12** in  $\text{CDCl}_3$ , 75 MHz for  $^{13}\text{C}$  NMR.



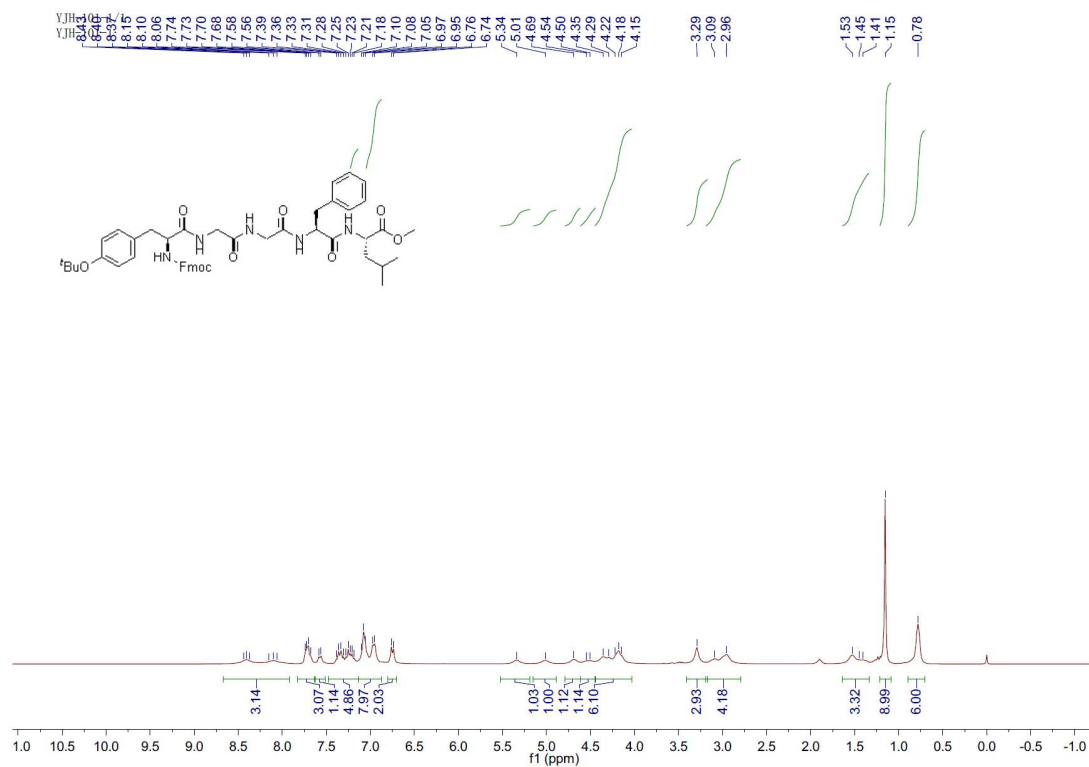

**Figure S102.**  $^1\text{H}$  NMR of compound **14** in  $\text{CDCl}_3$ , 300 MHz for  $^1\text{H}$  NMR.

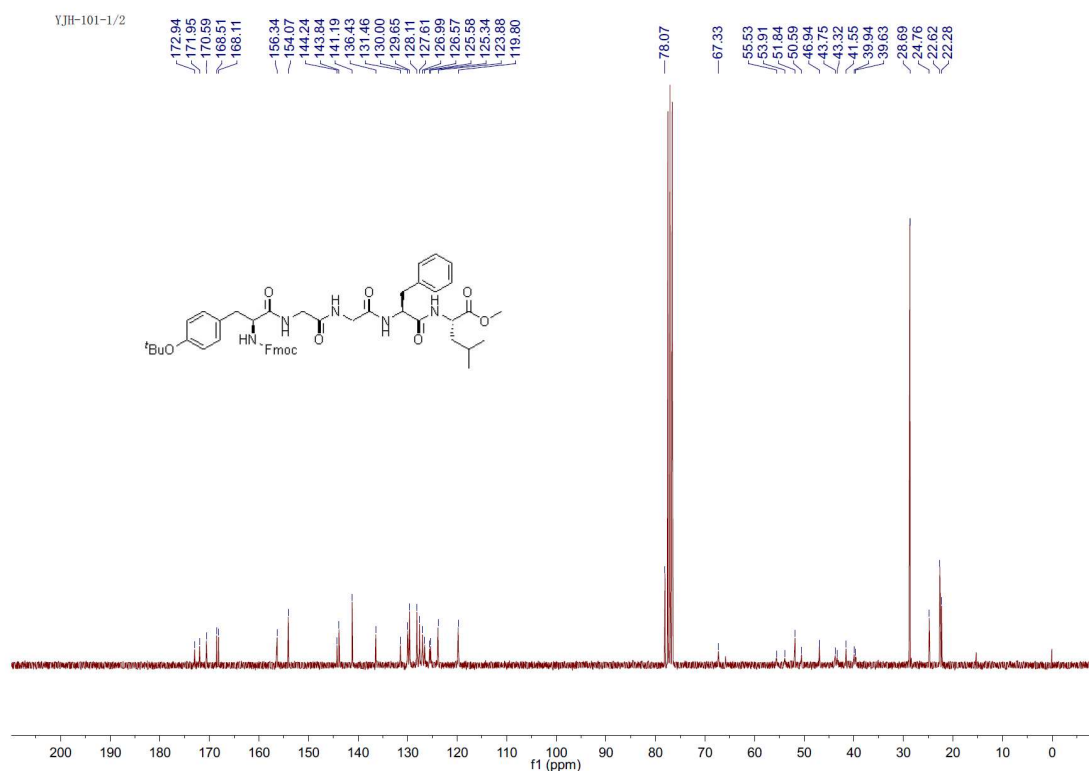

**Figure S103.**  $^{13}\text{C}$  NMR of compound **14** in  $\text{CDCl}_3$ , 75 MHz for  $^{13}\text{C}$  NMR.

## Reference:

1. W. D. G. Brittain and S. L. Cobb, Carboxylic acid deoxyfluorination and one-pot amide bond formation using pentafluoropyridine (PFP), *Org. Lett.*, 2021, **23**, 5793.
2. L. Bao, Z. X. Wang and X. Y. Chen, Photoinduced N-heterocyclic nitrenium-catalyzed single electron reduction of acyl fluorides for phenanthridine synthesis, *Org. Lett.*, 2023, **25**, 565.
3. W. Xiong, Y. Wang, X. Yang and W. H. Liu, Selective hydrolysis of primary and secondary amides enabled by visible light, *Org. Lett.*, 2023, **25**, 2948.
4. S.-P. Wang, C. W. Cheung and J.-A. Ma, Direct Amidation of Carboxylic Acids with Nitroarenes, *J. Org. Chem.*, 2019, **84**, 13922.
5. J.-X. Liang, P.-F. Yang and W. Shu, Synthesis of (hetero)aryl/alkenyl Iodides via Ni-catalyzed finkelstein reaction from bromides or chlorides, *Organometallics*, 2022, **41**, 3795.
6. M. D'Ascenzio, S. Carradori, D. Secci, D. Vullo, M. Ceruso, A. Akdemir and C. T. Supuran, Selective inhibition of human carbonic anhydrases by novel amide derivatives of probenecid: synthesis, biological evaluation and molecular modelling studies, *Bioorg. Med. Chem.*, 2014, **22**, 3982.
7. D. Chen, L. Xu, B. Ren, Z. Wang and C. Liu, Triflylpyridinium as coupling reagent for rapid amide and ester synthesis, *Org. Lett.*, 2023, **25**, 4571.
8. Z. Wang, X. Wang, P. Wang and J. Zhao, Allenone-mediated racemization/epimerization-free peptide bond formation and its application in peptide synthesis, *J. Am. Chem. Soc.*, 2021, **143**, 10374.
9. K. Manzor and F. Kelleher, Synthesis of orthogonally protected thioamide dipeptides for use in solid-phase peptide synthesis, *Tetrahedron Lett.*, 2016, **57**, 5237.
10. L. Gonnet, T. Tintillier, N. Venturini, L. Konnert, J.-F. Hernandez, F. Lamaty, G. Laconde, J. Martinez and E. Colacino, N-acyl benzotriazole derivatives for the synthesis of dipeptides and tripeptides and peptide biotinylation by mechanochemistry, *ACS Sustainable Chem. Eng.*, 2017, **5**, 2936.
11. L. Hu, S. Xu, Z. Zhao, Y. Yang, Z. Peng, M. Yang, C. Wang and J. Zhao, Ynamides as racemization-free coupling reagents for amide and peptide synthesis, *J. Am. Chem. Soc.*, 2016, **138**, 13135.
12. Z. Yuan, M. B. Nodwell, H. Yang, N. Malik, H. Merkens, F. Benard, R. E. Martin, P. Schaffer and R. Britton, Site-selective, late-stage C-H (18) F-fluorination on unprotected peptides for positron emission tomography imaging, *Angew. Chem. Int. Ed.*, 2018, **57**, 12733.
13. T. Liu, X. Zhang, Z. J. Peng and J. F. Zhao, Water-removable ynamide coupling reagent for racemization-free syntheses of peptides, amides, and esters, *Green Chem.*, 2021, **23**, 9916.
14. W. Muramatsu, H. Tsuji and H. Yamamoto, Catalytic peptide synthesis: amidation of N-hydroxyimino esters, *ACS Catal.*, 2018, **8**, 2181.

15. T. G. Bolduc, C. Lee, W. P. Chappell and G. M. Sammis, Thionyl fluoride-mediated one-pot substitutions and reductions of carboxylic acids, *J. Org. Chem.*, 2022, **87**, 7308.
16. J. W. Ren, M. N. Tong, Y. F. Zhao and F. Ni, Synthesis of dipeptide, amide, and ester without racemization by oxalyl chloride and catalytic triphenylphosphine oxide, *Org. Lett.*, 2021, **23**, 7497.
17. M. Huang, J.-J. Li and C. Zhang, Halogen-bonding-mediated synthesis of amides and peptides, *Green Chem.*, 2023, **25**, 9187.
